# Supplementary material for: Comprehensive characterization of anthraquinones in Damnacanthus indicus using mass spectrometry molecular networking and metabolomics-based herb discrimination
Source: Royal Society of Chemistry journal article supplement (doi:10.1039/d4ra06732k), 2024-01-01
Supplement: d4ra06732k1.pdf [file d4ra06732k1.pdf]

## Supplemental Data

### **Comprehensive characterization of anthraquinones in *Damnacanthus indicus* using mass spectrometry molecular networking and metabolomics-based herb discrimination**

**Lihua Zeng<sup>ab</sup>, Xing Yan<sup>ab</sup>, Ya Xu<sup>ab</sup>, Lulu Zheng<sup>ab</sup>, Wenwen Deng<sup>ab</sup>, Mengning Li<sup>\*ab</sup>, Hui Li<sup>\*abc</sup> and Zhixin Wang<sup>\*ab</sup>**

<sup>a</sup> Jiangxi Province Key Laboratory of Traditional Chinese Medicine Pharmacology, Institute of Traditional Chinese Medicine Health Industry, China Academy of Chinese Medical Sciences, Nanchang 330115, China

<sup>b</sup> Jiangxi Health Industry Institute of Traditional Chinese Medicine, Nanchang 330115, China

<sup>c</sup> Institute of Chinese Materia Medica, China Academy of Chinese Medical Sciences, Beijing 100700, China

\* Author for correspondence: Zhixin Wang

Email: gslzzhixin@163.com

**Figure S1.** Total ion current chromatograms (TICs) of UHPLC-MS analysis for 15 batches of *Damnacanthus indicus* samples from different habitats.

**Figure S2.** MS<sup>2</sup> spectra of eight reference compounds with chemical structures.

**Table S1.** All the identified or tentatively identified chemical constituents in *Damnacanthus indicus* by UHPLC-MS with related information.

**Table S2.** Chemical structures, experiment and predicted MS<sup>2</sup> spectra of all the identified compounds in *Damnacanthus indicus*.

**Table S3.** Content comparison of identified chemical markers in *Damnacanthus indicus* from seven different provinces.

**Table S4.** The screening criteria for 27 identified chemical markers.

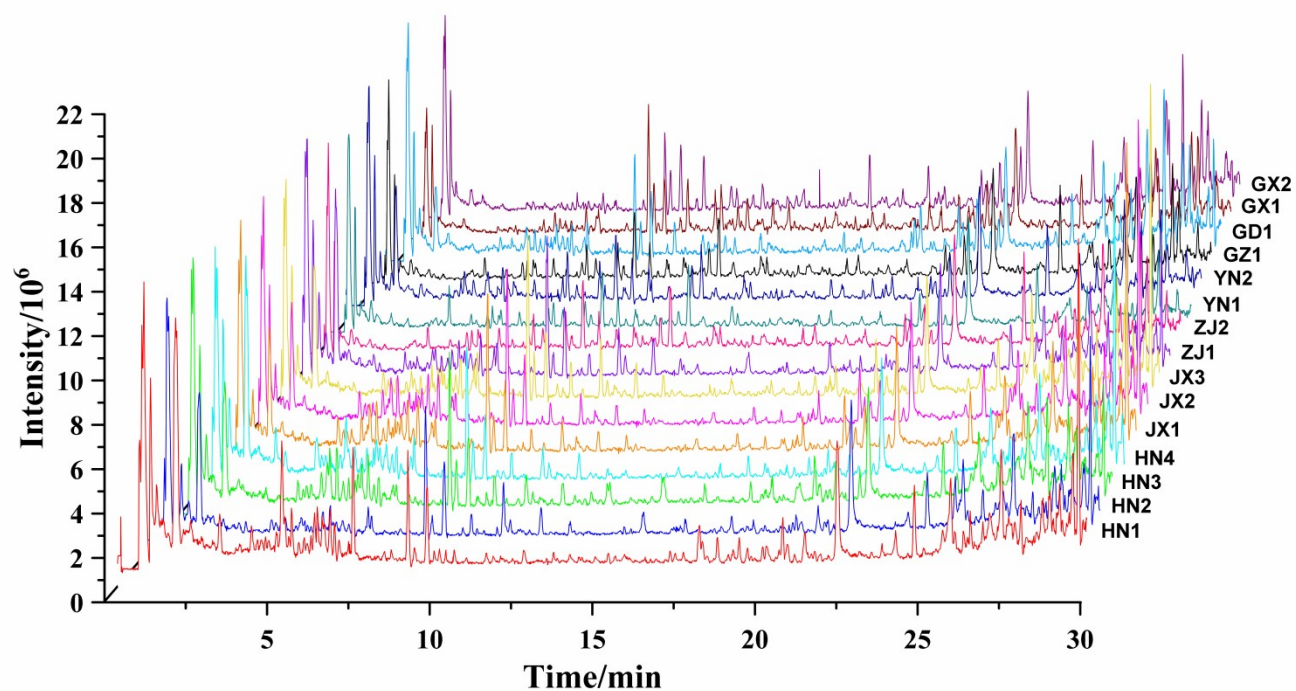

**Figure S1.** Total ion current chromatograms (TICs) of UHPLC-MS analysis for 15 batches of *Damnacanthus indicus* samples from different habitats.

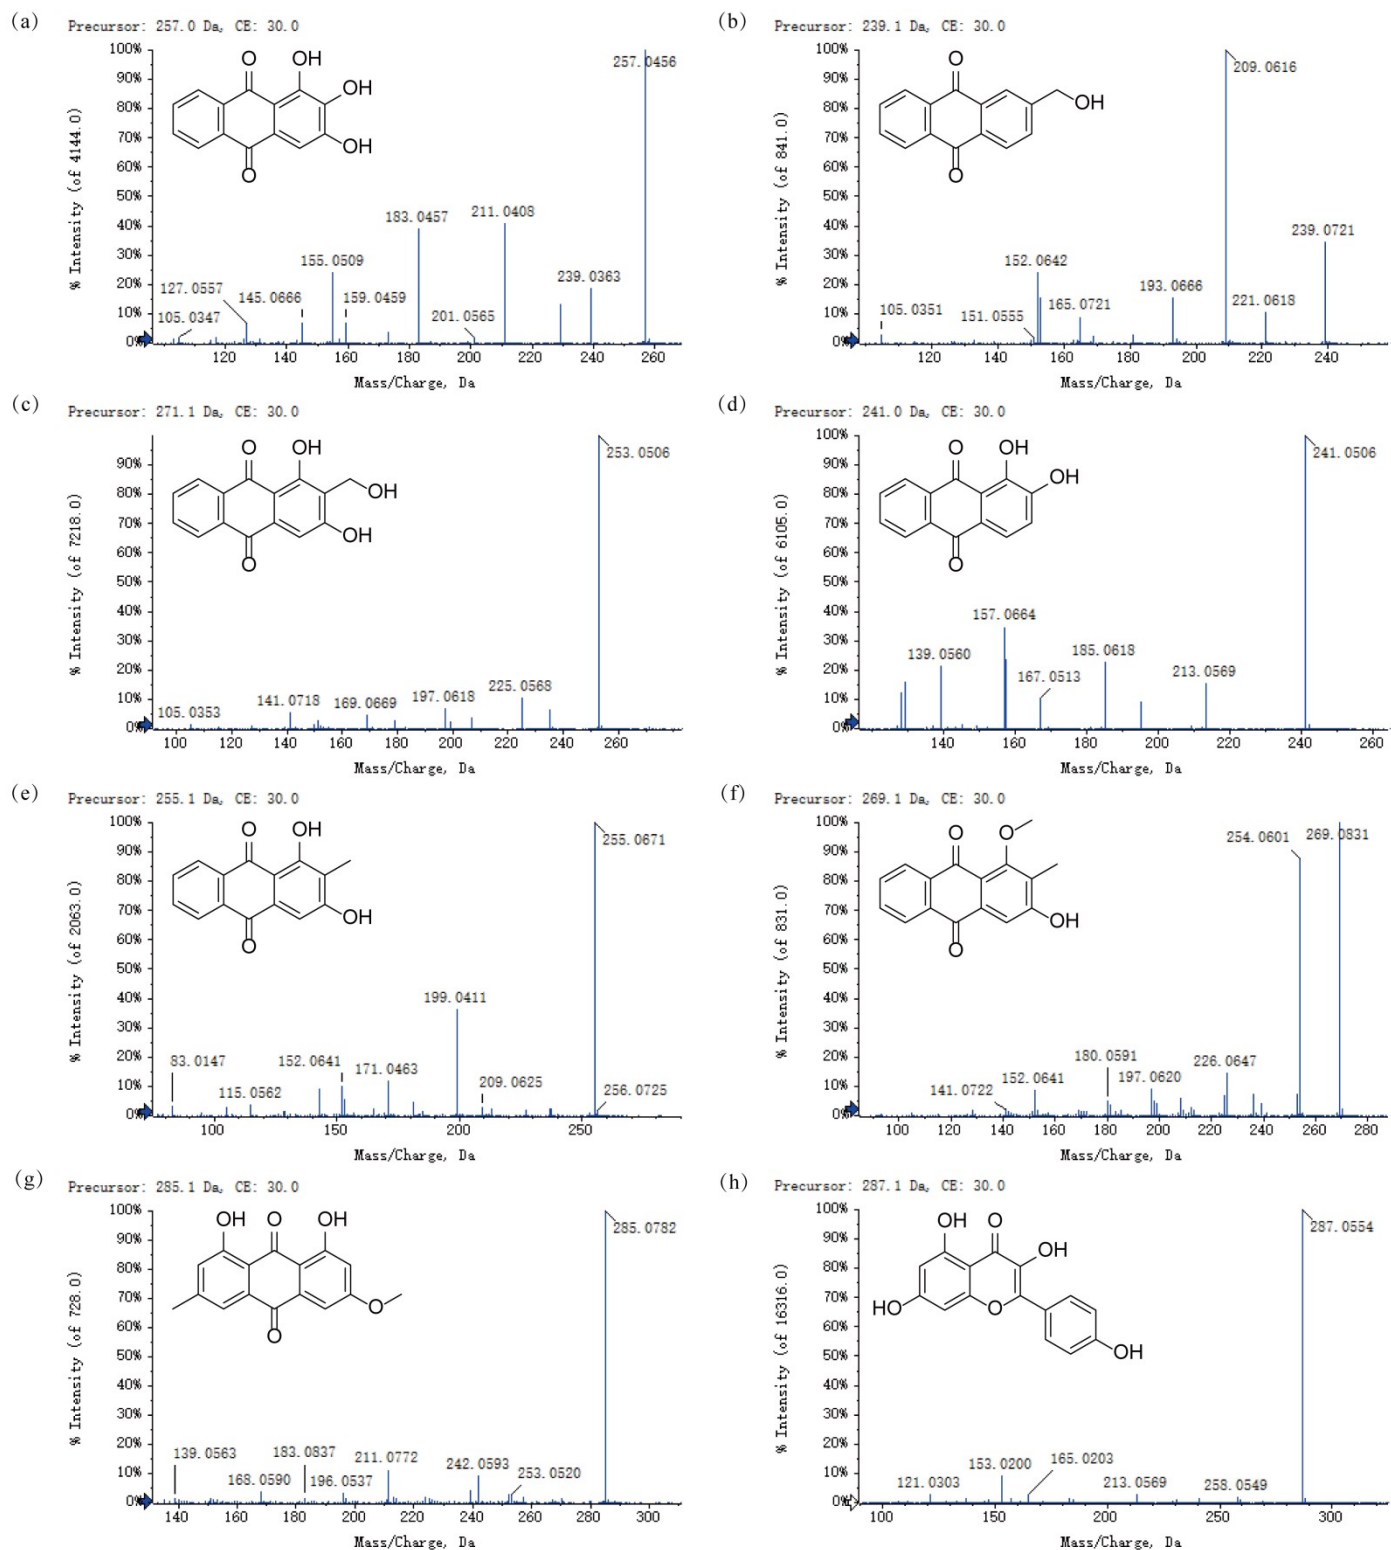

**Figure S2.** MS<sup>2</sup> spectra of eight reference compounds with chemical structures. (a) Anthragallol; (b) 2-Hydroxymethyl-anthraquinone; (c) Lucidin; (d) Alizarin; (e) Rubiadin; (f) Rubiadin-1-methyl ether; (g) Phycion; (h) Kaempferol.

**Table S1.** All the identified or tentatively identified chemical constituents in *Damnacanthus indicus* by UHPLC-MS with related information

| Peak no.       | RT (min) | Formula                                         | Identification                                             | Adduct ion         | Experimental mass m/z | Theoretical mass m/z | Mass error (ppm) | Fragment ions                                              | Score (max = 10) | Confidence level |
|----------------|----------|-------------------------------------------------|------------------------------------------------------------|--------------------|-----------------------|----------------------|------------------|------------------------------------------------------------|------------------|------------------|
| Anthraquinones |          |                                                 |                                                            |                    |                       |                      |                  |                                                            |                  |                  |
| 4              | 0.823    | C <sub>21</sub> H <sub>20</sub> O <sub>11</sub> | 1-O-Glucoside-2,6,8-trihydroxyl-3-methyl-anthraquinone     | [M+H] <sup>+</sup> | 449.1095              | 449.1078             | 3.79             | 287.0578, 269.0464, 303.0513, 449.1097, 85.0289            | 5.98             | II *             |
| 10             | 1.730    | C <sub>21</sub> H <sub>20</sub> O <sub>9</sub>  | Chrysophanein                                              | [M+H] <sup>+</sup> | 417.1174              | 417.1179             | -1.29            | 417.1192, 297.0778, 267.0674, 399.1096, 381.0939           | 7.05             | II               |
| 11             | 1.909    | C <sub>22</sub> H <sub>22</sub> O <sub>10</sub> | Physcion-1-O-glucoside                                     | [M+H] <sup>+</sup> | 447.1298              | 447.1285             | 2.80             | 327.0887, 411.1111, 351.0894, 381.0960                     | 6.73             | II               |
| 13             | 2.337    | C <sub>21</sub> H <sub>20</sub> O <sub>11</sub> | Aloe-emodin-7-hydroxyl-8-O-glucoside                       | [M+H] <sup>+</sup> | 449.1087              | 449.1078             | 2.09             | 329.0682, 299.0569, 353.0675, 449.1105, 395.0784           | 6.76             | II               |
| 14             | 2.340    | C <sub>27</sub> H <sub>30</sub> O <sub>13</sub> | Rubiadin-1-methoxyl-3-O-primeveroside                      | [M+H] <sup>+</sup> | 563.1766              | 563.1758             | 1.39             | 255.0670, 563.1787, 417.1205                               | 6.72             | II               |
| 15             | 2.559    | C <sub>22</sub> H <sub>22</sub> O <sub>11</sub> | 3-O-Glucoside-1,8-dihydroxyl-2-methoxymethyl-anthraquinone | [M+H] <sup>+</sup> | 463.1239              | 463.1234             | 0.97             | 313.0728, 343.0832, 367.0834, 427.1040, 463.1253, 397.0834 | 6.72             | II               |
| 16             | 2.924    | C <sub>21</sub> H <sub>20</sub> O <sub>10</sub> | Emodin-1-O-glucoside                                       | [M+H] <sup>+</sup> | 433.11405             | 433.1129             | 2.77             | 433.1147, 313.0728, 283.0622, 415.1045, 397.0944, 337.0716 | 7.17             | II               |
| 18             | 3.145    | C <sub>26</sub> H <sub>28</sub> O <sub>16</sub> | 1-O-Primeveroside-3,6,8-trihydroxyl-2-methyl-anthraquinone | [M+H] <sup>+</sup> | 597.1453              | 597.1449             | 0.65             | 303.0515, 435.0935, 133.0516                               | 6.78             | II               |
| 27             | 3.845    | C <sub>22</sub> H <sub>22</sub> O <sub>10</sub> | Glucobtusifolin                                            | [M+H] <sup>+</sup> | 447.1291              | 447.1285             | 1.33             | 287.0562, 419.0988, 133.0519                               | 7.07             | II               |
| 29             | 4.086    | C <sub>26</sub> H <sub>28</sub> O <sub>15</sub> | 3-O-Primeveroside-1,6,8-                                   | [M+H] <sup>+</sup> | 581.1497              | 581.1500             | -0.55            | 287.0562, 419.0988,                                        | 7.03             | II               |

| Peak no. | RT (min) | Formula                                        | Identification                                                                           | Adduct ion         | Experimental mass m/z | Theoretical mass m/z | Mass error (ppm) | Fragment ions                                                                                       | Score (max = 10) | Confidence level |
|----------|----------|------------------------------------------------|------------------------------------------------------------------------------------------|--------------------|-----------------------|----------------------|------------------|-----------------------------------------------------------------------------------------------------|------------------|------------------|
| 30       | 4.634    | C <sub>17</sub> H <sub>12</sub> O <sub>5</sub> | trihydroxyl-2-methyl-anthraquinone<br>2-Formyl-1,3-dimethoxyanthraquinone (CLogP: 2.960) | [M+H] <sup>+</sup> | 297.0765              | 297.0763             | 0.64             | 133.0519<br>297.0773, 267.0685,<br>283.0320, 239.0711,<br>165.0722, 193.0703<br>367.0828, 417.1206, | 5.48             | II               |
| 35       | 5.065    | C <sub>21</sub> H <sub>20</sub> O <sub>9</sub> | Rubiadin-3-O-glucoside                                                                   | [M+H] <sup>+</sup> | 417.1179              | 417.1179             | -0.05            | 192.0799, 161.0616,<br>132.0587                                                                     | 6.51             | II               |
| 36       | 5.320    | C <sub>15</sub> H <sub>8</sub> O <sub>5</sub>  | Damnacanthal (CLogP: 3.204)                                                              | [M+H] <sup>+</sup> | 283.0601              | 283.0600             | 0.18             | 283.0607, 253.0525,<br>197.0621, 169.0677,<br>225.0565                                              | 6.09             | II               |
| 37       | 6.181    | C <sub>14</sub> H <sub>8</sub> O <sub>4</sub>  | Xanthopurpurin                                                                           | [M+H] <sup>+</sup> | 241.0493              | 241.0501             | -3.27            | 213.0575, 185.0619,<br>157.0664,<br>139.0558, 129.0716<br>247.0989, 271.0994,                       | 6.30             | II               |
| 38       | 6.461    | C <sub>16</sub> H <sub>16</sub> O <sub>5</sub> | 1,3-Dihydroxyl-2-methoxymethyl-anthraquinone                                             | [M+H] <sup>+</sup> | 289.1077              | 289.1070             | 2.51             | 229.0875, 205.0870,<br>159.0825<br>215.0362, 257.0569,                                              | 6.38             | II               |
| 40       | 6.749    | C <sub>15</sub> H <sub>8</sub> O <sub>6</sub>  | Norjuzunal (CLogP: 3.412)                                                                | [M+H] <sup>+</sup> | 285.0399              | 285.0399             | 0.18             | 187.0411, 159.0469,<br>239.0360<br>345.0988, 315.0517,<br>285.0517                                  | 5.77             | II               |
| 41       | 7.060    | C <sub>17</sub> H <sub>14</sub> O <sub>7</sub> | Obtusin                                                                                  | [M+H] <sup>+</sup> | 345.0977              | 345.0968             | 2.63             | 256.0384, 271.0624,<br>228.0411, 199.0409<br>269.0807, 254.0580,                                    | 5.94             | II               |
| 42       | 7.573    | C <sub>15</sub> H <sub>10</sub> O <sub>5</sub> | 1,7-Dihydroxyl-2-hydroxymethyl-anthraquinone (CLogP: 2.190)                              | [M+H] <sup>+</sup> | 271.0599              | 271.0600             | -0.59            | 299.0912, 223.0763,<br>165.0714                                                                     | 6.38             | II               |
| 43       | 7.805    | C <sub>17</sub> H <sub>14</sub> O <sub>5</sub> | 1,3-Dimethoxyl-2-hydroxymethyl-anthraquinone (CLogP: 2.475)                              | [M+H] <sup>+</sup> | 299.0906              | 299.0913             | -2.32            |                                                                                                     | 6.21             | II               |

| Peak no. | RT (min) | Formula                                         | Identification                                                          | Adduct ion         | Experimental mass m/z | Theoretical mass m/z | Mass error (ppm) | Fragment ions                                              | Score (max = 10) | Confidence level |
|----------|----------|-------------------------------------------------|-------------------------------------------------------------------------|--------------------|-----------------------|----------------------|------------------|------------------------------------------------------------|------------------|------------------|
| 44       | 8.121    | C <sub>28</sub> H <sub>32</sub> O <sub>14</sub> | Physcion-8- <i>O</i> -rutinoside                                        | [M+H] <sup>+</sup> | 593.1861              | 593.1870             | -1.52            | 285.0762, 447.1295, 593.1871                               | 7.12             | II               |
| 45       | 8.209    | C <sub>21</sub> H <sub>20</sub> O <sub>9</sub>  | Franguloside                                                            | [M+H] <sup>+</sup> | 417.1186              | 417.1179             | 1.56             | 367.0829, 161.0614, 399.1086, 132.0583                     | 6.48             | II               |
| 46       | 8.258    | C <sub>16</sub> H <sub>12</sub> O <sub>5</sub>  | 2-Hydroxyl-3-methoxyl-7-hydroxymethyl-anthraquinone (CLogP: 2.025)      | [M+H] <sup>+</sup> | 285.0754              | 285.0757             | -0.98            | 285.0782, 211.0777, 239.0728, 252.0439, 224.0497, 196.0539 | 6.13             | II               |
| 47       | 8.469    | C <sub>16</sub> H <sub>12</sub> O <sub>6</sub>  | 3,6-Dihydroxyl-1-methoxyl-2-hydroxymethyl-anthraquinone (CLogP: 1.685)  | [M+H] <sup>+</sup> | 301.0711              | 301.0706             | 1.57             | 301.0724, 268.0385, 212.0491, 184.0545, 240.0446, 286.0507 | 6.09             | II               |
| 48       | 8.627    | C <sub>15</sub> H <sub>10</sub> O <sub>5</sub>  | 2,3-Dihydroxyl-1-methoxyl-anthraquinone (CLogP: 2.598)                  | [M+H] <sup>+</sup> | 271.0610              | 271.0600             | 3.60             | 253.0515, 225.0575, 197.0624, 141.0720                     | 6.38             | II               |
| 50       | 8.838    | C <sub>20</sub> H <sub>18</sub> O <sub>5</sub>  | Madagascin                                                              | [M+H] <sup>+</sup> | 339.1232              | 339.1233             | -0.13            | 289.0880, 307.0988, 165.0567, 219.0930, 247.0789           | 5.52             | II               |
| 51       | 9.126    | C <sub>16</sub> H <sub>12</sub> O <sub>5</sub>  | Ophiohayatone A (CLogP: 2.566)                                          | [M+H] <sup>+</sup> | 285.0754              | 285.0757             | -1.09            | 267.0645, 181.0654, 209.0608, 152.0629, 237.0559           | 6.18             | II               |
| 52       | 9.162    | C <sub>15</sub> H <sub>10</sub> O <sub>5</sub>  | 2,5-Dihydroxy-1-methoxy-9,10-anthracenedione (CLogP: 2.983)             | [M+H] <sup>+</sup> | 271.0607              | 271.0600             | 2.50             | 256.0382, 228.0465, 172.0537, 126.0476                     | 5.42             | II               |
| 53       | 9.241    | C <sub>16</sub> H <sub>12</sub> O <sub>6</sub>  | 1,2,8-Trihydroxyl-3-methyl-6-hydroxymethyl-anthraquinone (CLogP: 2.529) | [M+H] <sup>+</sup> | 301.0706              | 301.0706             | 0.17             | 283.0612, 255.0667, 237.0553, 201.0560                     | 6.16             | II               |
| 54       | 9.63     | C <sub>17</sub> H <sub>14</sub> O <sub>6</sub>  | Isorhodoptilometrin (CLogP: 2.618)                                      | [M+H] <sup>+</sup> | 315.0861              | 315.0866             | -1.65            | 297.0769, 282.0538, 253.0513, 225.0555                     | 5.87             | II               |
| 55       | 9.654    | C <sub>15</sub> H <sub>10</sub> O <sub>5</sub>  | 1,6-Dihydroxy-2-methoxy-9,10-anthracenedione (CLogP: 2.983)             | [M+H] <sup>+</sup> | 271.0603              | 271.0600             | 1.18             | 271.0614, 153.0201, 215.0726, 243.0679                     | 6.73             | II               |
| 56       | 9.823    | C <sub>20</sub> H <sub>20</sub> O <sub>5</sub>  | Lupinacidin A                                                           | [M+H] <sup>+</sup> | 341.1394              | 341.1383             | 3.21             | 341.1415, 270.0901, 291.1053, 211.0785,                    | 5.97             | II               |

| Peak no. | RT (min) | Formula                                        | Identification                                                  | Adduct ion         | Experimental mass m/z | Theoretical mass m/z | Mass error (ppm) | Fragment ions                                                      | Score (max = 10) | Confidence level |
|----------|----------|------------------------------------------------|-----------------------------------------------------------------|--------------------|-----------------------|----------------------|------------------|--------------------------------------------------------------------|------------------|------------------|
| 57       | 9.861    | C <sub>16</sub> H <sub>12</sub> O <sub>5</sub> | 2-Hydroxyl-1,3-dimethoxyl-anthraquinone (CLogP: 2.656)          | [M+H] <sup>+</sup> | 285.0749              | 285.0757             | -2.67            | 239.0750<br>239.0721, 256.0750,<br>285.0775, 267.0674,<br>224.0492 | 6.34             | II               |
| 58       | 9.957    | C <sub>15</sub> H <sub>10</sub> O <sub>4</sub> | Digiferruginol (CLogP: 2.702)                                   | [M+H] <sup>+</sup> | 255.0651              | 255.0651             | 0.00             | 255.0669, 240.0437,<br>184.0537                                    | 5.86             | II               |
| 60       | 10.095   | C <sub>15</sub> H <sub>8</sub> O <sub>5</sub>  | 1-Hydroxyl-8-carboxy-anthraquinone (CLogP: 3.555)               | [M+H] <sup>+</sup> | 269.0437              | 269.0437             | -4.76            | 269.0443, 199.0402,<br>211.0403, 241.0514,<br>171.0458             | 6.17             | II               |
| 61       | 10.348   | C <sub>16</sub> H <sub>12</sub> O <sub>6</sub> | 1,6-Dihydroxyl-2,5-dimethoxyl-anthraquinone (CLogP: 2.684)      | [M+H] <sup>+</sup> | 301.0695              | 301.0706             | -3.58            | 283.0591, 197.0606,<br>225.0562, 253.0506                          | 6.25             | II               |
| 62       | 10.421   | C <sub>14</sub> H <sub>8</sub> O <sub>5</sub>  | Anthragallol                                                    | [M+H] <sup>+</sup> | 257.0452              | 257.0444             | 3.03             | 257.0564, 211.0407,<br>239.0361, 155.0515                          | 6.39             | I                |
| 63       | 10.563   | C <sub>16</sub> H <sub>10</sub> O <sub>7</sub> | Endocrocin                                                      | [M+H] <sup>+</sup> | 315.0503              | 315.0499             | 1.48             | 297.0408, 254.0222,<br>237.0202                                    | 5.75             | II               |
| 64       | 10.631   | C <sub>17</sub> H <sub>12</sub> O <sub>5</sub> | 3-Hydroxyl-1-methyl-2-carbomethoxy-anthraquinone (CLogP: 4.227) | [M+H] <sup>+</sup> | 297.0766              | 297.0757             | 3.16             | 297.0779, 265.0516,<br>283.0345, 237.0567,<br>250.9394, 209.0625   | 5.62             | II               |
| 66       | 10.743   | C <sub>15</sub> H <sub>10</sub> O <sub>6</sub> | Aloe-emodin-2-hydroxyl (CLogP: 2.030)                           | [M+H] <sup>+</sup> | 287.0554              | 287.0549             | 1.47             | 272.0341, 244.0381,<br>255.0312, 188.0484                          | 6.08             | II               |
| 67       | 10.842   | C <sub>15</sub> H <sub>10</sub> O <sub>3</sub> | 2-Hydroxymethyl-anthraquinone                                   | [M+H] <sup>+</sup> | 239.07067             | 239.0707             | -0.61            | 209.0612, 153.0719,<br>193.0674, 221.0630                          | 6.37             | I                |
| 68       | 10.888   | C <sub>16</sub> H <sub>12</sub> O <sub>5</sub> | 3-Hydroxyl-1,2-dimethoxyl-anthraquinone (CLogP: 2.756)          | [M+H] <sup>+</sup> | 285.0763              | 285.0757             | 2.13             | 256.0757, 241.0516,<br>225.0569, 270.0546,<br>196.0539             | 6.21             | II               |
| 69       | 11.024   | C <sub>17</sub> H <sub>12</sub> O <sub>6</sub> | Emodin-6-geranyl                                                | [M+H] <sup>+</sup> | 313.0701              | 313.0712             | -3.58            | 313.0718, 269.0471,<br>253.0521, 284.0696                          | 6.37             | II               |
| 70       | 11.039   | C <sub>18</sub> H <sub>14</sub> O <sub>6</sub> | Physcion-2-acety                                                | [M+H] <sup>+</sup> | 327.0872              | 327.0869             | 0.92             | 267.0672, 98.9860,<br>309.0777, 281.0826,                          | 5.70             | II               |

| Peak no. | RT (min) | Formula                                        | Identification                                                      | Adduct ion         | Experimental mass m/z | Theoretical mass m/z | Mass error (ppm) | Fragment ions                                                      | Score (max = 10) | Confidence level |
|----------|----------|------------------------------------------------|---------------------------------------------------------------------|--------------------|-----------------------|----------------------|------------------|--------------------------------------------------------------------|------------------|------------------|
| 71       | 11.121   | C <sub>17</sub> H <sub>14</sub> O <sub>5</sub> | 6-Hydroxyl-7-methoxyl-2-methoxymethyl-anthraquinone (CLogP: 2.861)  | [M+H] <sup>+</sup> | 299.0905              | 299.0913             | -2.61            | 238.0652<br>299.0932, 255.0673,<br>284.0700, 269.0466,<br>239.0724 | 6.26             | II               |
| 72       | 11.273   | C <sub>17</sub> H <sub>12</sub> O <sub>4</sub> | 2-Acetoxymethyl-anthraquinone                                       | [M+H] <sup>+</sup> | 281.0800              | 281.0808             | -2.84            | 281.0826, 236.0494,<br>265.0514, 152.0639<br>315.0878, 285.0413,   | 5.65             | II               |
| 73       | 11.286   | C <sub>17</sub> H <sub>14</sub> O <sub>6</sub> | Fistulaquinones-C (CLogP: 2.624)                                    | [M+H] <sup>+</sup> | 315.0853              | 315.0862             | -2.88            | 300.0647, 257.0468,<br>271.0621                                    | 6.03             | II               |
| 74       | 11.289   | C <sub>17</sub> H <sub>14</sub> O <sub>5</sub> | Damnacanthol-2-methoxymethyl (CLogP: 3.061)                         | [M+H] <sup>+</sup> | 299.0912              | 299.0913             | -0.48            | 281.0821, 236.0486,<br>251.0719, 266.0596                          | 5.85             | II               |
| 75       | 11.344   | C <sub>17</sub> H <sub>12</sub> O <sub>6</sub> | Ethyl 9,10-dihydro-1,3-dihydroxy-9,10-dioxo-2-anthracenecarboxylate | [M+H] <sup>+</sup> | 313.0710              | 313.0706             | 1.44             | 313.0719, 269.0469,<br>298.0497, 211.0403                          | 6.36             | II               |
| 76       | 11.347   | C <sub>15</sub> H <sub>10</sub> O <sub>5</sub> | Lucidin                                                             | [M+H] <sup>+</sup> | 271.0603              | 271.0600             | 1.03             | 253.0494, 225.0560,<br>197.0610                                    | 6.79             | I                |
| 78       | 11.569   | C <sub>15</sub> H <sub>10</sub> O <sub>4</sub> | Alizarin 1-methyl ether (CLogP: 3.063)                              | [M+H] <sup>+</sup> | 255.0639              | 255.0651             | -4.67            | 240.0413, 255.0651,<br>212.0473, 181.0659<br>267.0306, 183.0462,   | 6.56             | II               |
| 79       | 11.716   | C <sub>15</sub> H <sub>8</sub> O <sub>6</sub>  | 1,5-Dihydroxyl-3-carboxy-anthraquinone (CLogP: 3.529)               | [M+H] <sup>+</sup> | 285.0398              | 285.0393             | 1.89             | 211.0415, 239.0368,<br>155.0511                                    | 6.07             | II               |
| 80       | 11.926   | C <sub>17</sub> H <sub>14</sub> O <sub>5</sub> | 3-Hydroxyl-2,4-dimethoxyl-1-methyl-anthraquinone (CLogP: 3.255)     | [M+H] <sup>+</sup> | 299.0915              | 299.0913             | 0.72             | 299.0933, 284.0706,<br>256.0753                                    | 6.00             | II               |
| 81       | 11.941   | C <sub>16</sub> H <sub>8</sub> O <sub>5</sub>  | 1-Hydroxyl-3,7-dialdehyde-anthraquinone                             | [M+H] <sup>+</sup> | 281.0453              | 281.0444             | 3.13             | 281.0453, 150.0287,<br>169.0670, 253.0510,<br>197.0616             | 6.39             | II               |
| 82       | 12.170   | C <sub>16</sub> H <sub>12</sub> O <sub>5</sub> | Lucidin ω-methyl ether (CLogP: 2.976)                               | [M+H] <sup>+</sup> | 285.0752              | 285.0757             | -1.79            | 267.0659, 285.0765,<br>252.0430, 196.0534,                         | 6.47             | II               |

| Peak no. | RT (min) | Formula                                         | Identification                                                  | Adduct ion         | Experimental mass m/z | Theoretical mass m/z | Mass error (ppm) | Fragment ions                                                      | Score (max = 10) | Confidence level |
|----------|----------|-------------------------------------------------|-----------------------------------------------------------------|--------------------|-----------------------|----------------------|------------------|--------------------------------------------------------------------|------------------|------------------|
| 83       | 12.308   | C <sub>14</sub> H <sub>8</sub> O <sub>4</sub>   | Alizarin                                                        | [M+H] <sup>+</sup> | 241.0495              | 241.0495             | 0.21             | 237.0565<br>241.0513, 185.0615,<br>157.0667, 139.0561,<br>213.0569 | 6.33             | I                |
| 84       | 12.405   | C <sub>17</sub> H <sub>14</sub> O <sub>6</sub>  | Rhodoptilometrin (CLogP: 2.918)                                 | [M+H] <sup>+</sup> | 315.0853              | 315.0862             | -3.10            | 315.0875, 282.0544,<br>254.0591, 300.0651<br>283.0622, 268.0392,   | 6.65             | II               |
| 85       | 12.496   | C <sub>16</sub> H <sub>12</sub> O <sub>6</sub>  | 1,7-Dihydroxyl-3,6-dimethoxyl-anthraquinone                     | [M+H] <sup>+</sup> | 301.0710              | 301.0706             | 1.23             | 286.0490, 239.0365,<br>255.0681                                    | 6.19             | II               |
| 86       | 12.498   | C <sub>15</sub> H <sub>8</sub> O <sub>3</sub>   | 1-Formylanthraquinone                                           | [M+H] <sup>+</sup> | 237.0537              | 237.0545             | -3.69            | 237.0544, 209.0600,<br>152.0627, 181.0600                          | 5.54             | II               |
| 87       | 12.503   | C <sub>15</sub> H <sub>10</sub> O <sub>4</sub>  | Alizarin 2-methyl ether (CLogP: 3.523)                          | [M+H] <sup>+</sup> | 255.0656              | 255.0651             | 2.00             | 237.0549, 209.0604,<br>181.0660                                    | 6.37             | II               |
| 88       | 12.517   | C <sub>15</sub> H <sub>10</sub> O <sub>6</sub>  | 1,3,6-Trihydroxy-2-methoxy-9,10-anthracenedione (CLogP: 2.111)  | [M+H] <sup>+</sup> | 287.0557              | 287.0549             | 2.72             | 269.0446, 241.0513,<br>213.0570, 251.0353<br>269.0443, 241.0514,   | 6.94             | II               |
| 89       | 12.530   | C <sub>15</sub> H <sub>8</sub> O <sub>5</sub>   | Nordamnacanthal (CLogP: 3.575)                                  | [M+H] <sup>+</sup> | 269.0432              | 269.0444             | -4.46            | 213.0556, 195.0460,<br>251.0353                                    | 6.18             | II               |
| 90       | 12.815   | C <sub>15</sub> H <sub>10</sub> O <sub>7</sub>  | Robustaquinone F                                                | [M+H] <sup>+</sup> | 303.0503              | 303.0499             | 1.44             | 285.0410, 231.0301,<br>257.0462                                    | 6.56             | II               |
| 91       | 12.823   | C <sub>21</sub> H <sub>18</sub> O <sub>11</sub> | Alatonal                                                        | [M+H] <sup>+</sup> | 285.0392              | 285.0393             | -0.34            | 285.0412, 257.0464,<br>229.0518                                    | 6.54             | II               |
| 92       | 12.895   | C <sub>15</sub> H <sub>8</sub> O <sub>4</sub>   | 3-Hydroxyl-2-aldehyde-anthraquinone (CLogP: 3.264)              | [M+H] <sup>+</sup> | 253.0488              | 253.0501             | -5.06            | 253.0500, 195.0454,<br>139.0553, 167.0507,<br>225.0569             | 6.17             | II               |
| 93       | 12.993   | C <sub>17</sub> H <sub>14</sub> O <sub>5</sub>  | 1-Hydroxyl-5,6-dimethoxyl-2-methyl-anthraquinone (CLogP: 3.802) | [M+H] <sup>+</sup> | 299.0918              | 299.0913             | 1.57             | 299.0934, 255.0667,<br>284.0700, 269.0452,<br>238.0658             | 6.05             | II               |
| 94       | 13.059   | C <sub>16</sub> H <sub>12</sub> O <sub>6</sub>  | 1,3,5-Trihydroxy-2-                                             | [M+H] <sup>+</sup> | 301.0708              | 301.0706             | 0.73             | 301.0718, 240.0435,                                                | 6.46             | II               |

| Peak no. | RT (min) | Formula                                        | Identification                                                                              | Adduct ion         | Experimental mass m/z | Theoretical mass m/z | Mass error (ppm) | Fragment ions                                                                                           | Score (max = 10) | Confidence level |
|----------|----------|------------------------------------------------|---------------------------------------------------------------------------------------------|--------------------|-----------------------|----------------------|------------------|---------------------------------------------------------------------------------------------------------|------------------|------------------|
| 95       | 13.208   | C <sub>16</sub> H <sub>12</sub> O <sub>6</sub> | (methoxymethyl)-9,10-anthracenedione<br>2,7,8-Trihydroxyl-1-methoxyl-3-methyl-anthraquinone | [M+H] <sup>+</sup> | 301.0698              | 301.0706             | -2.59            | 212.0486, 268.0386, 184.0536<br>301.0716, 240.0436, 212.0483, 227.0357, 268.0388<br>329.1029, 299.0571, | 6.25             | II               |
| 96       | 13.365   | C <sub>18</sub> H <sub>16</sub> O <sub>6</sub> | Isorhodoptilometrin-1-methoxyl                                                              | [M+H] <sup>+</sup> | 329.1015              | 329.1019             | -1.27            | 314.0807, 271.0625, 253.0521<br>254.0571, 269.0802, 226.0634, 197.0617                                  | 6.25             | II               |
| 97       | 13.437   | C <sub>16</sub> H <sub>12</sub> O <sub>4</sub> | Rubiadin 1-methyl ether                                                                     | [M+H] <sup>+</sup> | 269.0804              | 269.0808             | -1.37            | 283.0979, 268.0752, 239.0725                                                                            | 6.22             | I                |
| 98       | 13.451   | C <sub>17</sub> H <sub>14</sub> O <sub>4</sub> | 2-Dimethoxymethyl-anthraquinone (CLogP: 3.103)                                              | [M+H] <sup>+</sup> | 283.0960              | 283.0970             | -3.81            | 301.0709, 268.0376, 212.0482, 227.0355, 286.0488                                                        | 6.62             | II               |
| 99       | 13.485   | C <sub>16</sub> H <sub>12</sub> O <sub>6</sub> | Obtusifolin-6-hydroxyl                                                                      | [M+H] <sup>+</sup> | 301.0702              | 301.0706             | -1.16            | 271.0610, 256.0376, 228.0430, 197.0611                                                                  | 6.19             | II               |
| 100      | 13.535   | C <sub>15</sub> H <sub>10</sub> O <sub>5</sub> | Rubiadin-6-hydroxyl (CLogP: 3.057)                                                          | [M+H] <sup>+</sup> | 271.0590              | 271.0600             | -3.62            | 299.0940, 210.0706, 225.0564, 266.0609                                                                  | 6.47             | II               |
| 101      | 13.745   | C <sub>17</sub> H <sub>14</sub> O <sub>5</sub> | 1-Hydroxyl-6,7-dimethoxyl-2-methyl-anthraquinone (CLogP: 3.852)                             | [M+H] <sup>+</sup> | 299.0920              | 299.0913             | 2.19             | 253.0502, 225.0560, 197.0614, 141.0718                                                                  | 5.90             | II               |
| 102      | 14.011   | C <sub>15</sub> H <sub>8</sub> O <sub>4</sub>  | 1-Hydroxyl-2-carbaldehyde-anthraquinone (CLogP: 3.354)                                      | [M+H] <sup>+</sup> | 253.0489              | 253.0495             | -2.33            | 225.0551, 254.0581, 269.0807, 208.0538, 236.0487                                                        | 6.25             | II               |
| 103      | 14.023   | C <sub>16</sub> H <sub>12</sub> O <sub>4</sub> | 6-Hydroxyl-2-methoxymethyl-anthraquinone (CLogP: 3.128)                                     | [M+H] <sup>+</sup> | 269.0799              | 269.0808             | -3.23            | 267.0671, 237.0564, 209.0614, 196.0538                                                                  | 6.23             | II               |
| 104      | 14.030   | C <sub>16</sub> H <sub>10</sub> O <sub>4</sub> | 2-(Methoxycarbonyl)anthraquinone                                                            | [M+H] <sup>+</sup> | 267.0654              | 267.0651             | 1.24             | 253.0504, 225.0561, 197.0618, 271.0622                                                                  | 5.93             | II               |
| 105      | 14.051   | C <sub>15</sub> H <sub>10</sub> O <sub>5</sub> | 1,5-Dihydroxy-2-methoxy-9,10-anthracenedione (CLogP: 3.443)                                 | [M+H] <sup>+</sup> | 271.0606              | 271.0600             | 2.07             |                                                                                                         | 6.75             | II               |

| Peak no. | RT (min) | Formula                                        | Identification                                                            | Adduct ion         | Experimental mass m/z | Theoretical mass m/z | Mass error (ppm) | Fragment ions                                              | Score (max = 10) | Confidence level |
|----------|----------|------------------------------------------------|---------------------------------------------------------------------------|--------------------|-----------------------|----------------------|------------------|------------------------------------------------------------|------------------|------------------|
| 106      | 14.232   | C <sub>17</sub> H <sub>12</sub> O <sub>5</sub> | 8-Hydroxyl-2-methyl-3-carbomethoxy-anthraquinone (CLogP: 4.315)           | [M+H] <sup>+</sup> | 297.0763              | 297.0757             | 2.02             | 297.0792, 267.0670, 211.0779, 239.0702                     | 5.66             | II               |
| 107      | 14.271   | C <sub>15</sub> H <sub>10</sub> O <sub>6</sub> | 1,5,8-Trihydroxyl-2-methoxyl-anthraquinone                                | [M+H] <sup>+</sup> | 287.0551              | 287.0549             | 0.56             | 287.0570, 272.0337, 244.0391, 213.0568                     | 6.20             | II               |
| 108      | 14.404   | C <sub>15</sub> H <sub>10</sub> O <sub>3</sub> | 2-Hydroxyl-3-methyl-anthraquinone (CLogP: 3.779)                          | [M+H] <sup>+</sup> | 239.0703              | 239.0702             | 0.25             | 239.0719, 165.0717, 211.0769, 193.0669                     | 6.37             | II               |
| 109      | 14.436   | C <sub>16</sub> H <sub>12</sub> O <sub>5</sub> | Morindone 5-methyl ether (CLogP: 3.432)                                   | [M+H] <sup>+</sup> | 285.0758              | 285.0757             | 0.35             | 270.0546, 242.0603, 224.0494, 196.0541                     | 6.40             | II               |
| 110      | 14.482   | C <sub>15</sub> H <sub>10</sub> O <sub>5</sub> | Morindone                                                                 | [M+H] <sup>+</sup> | 271.0604              | 271.0600             | 1.44             | 271.0619, 256.0385, 228.0437, 211.0408                     | 5.9              | II               |
| 111      | 14.594   | C <sub>16</sub> H <sub>12</sub> O <sub>6</sub> | Xanthorin (CLogP: 3.779)                                                  | [M+H] <sup>+</sup> | 301.0709              | 301.0706             | 1.04             | 283.0620, 255.0676, 227.0730, 301.1434                     | 6.38             | II               |
| 112      | 14.682   | C <sub>17</sub> H <sub>14</sub> O <sub>6</sub> | 1,6,7-Trihydroxyl-3-methoxyl-8-methoxymethyl-anthraquinone (CLogP: 2.975) | [M+H] <sup>+</sup> | 315.0862              | 315.0862             | -0.06            | 315.0884, 300.0649, 282.0542, 253.0519                     | 6.39             | II               |
| 113      | 14.704   | C <sub>15</sub> H <sub>10</sub> O <sub>4</sub> | 1,2-Dihydroxy-6-methyl-9,10-anthracenedione (CLogP: 3.777)                | [M+H] <sup>+</sup> | 255.0659              | 255.0651             | 2.98             | 255.0678, 171.0825, 199.0776, 227.0727, 181.0670           | 6.17             | II               |
| 114      | 14.946   | C <sub>16</sub> H <sub>12</sub> O <sub>5</sub> | 1,5-Dihydroxyl-6-methoxyl-2-methyl-anthraquinone                          | [M+H] <sup>+</sup> | 285.0762              | 285.0757             | 1.86             | 285.0777, 270.0555, 229.0515, 201.0571                     | 6.62             | II               |
| 116      | 15.063   | C <sub>18</sub> H <sub>16</sub> O <sub>6</sub> | 1,3-Dihydroxyl-6-methoxyl-2-ethoxymethyl-anthraquinone                    | [M+H] <sup>+</sup> | 329.1012              | 329.1025             | -3.94            | 329.1028, 299.0568, 271.0621, 311.0931, 211.0408, 253.0514 | 5.94             | II               |
| 117      | 15.337   | C <sub>15</sub> H <sub>10</sub> O <sub>4</sub> | Soranjidiol (CLogP: 3.727)                                                | [M+H] <sup>+</sup> | 255.0655              | 255.0651             | 1.42             | 255.0670, 240.0440, 181.0671, 212.0490                     | 6.27             | II               |
| 118      | 15.356   | C <sub>17</sub> H <sub>14</sub> O <sub>5</sub> | Emodin-1,6-dimethoxyl (CLogP: 4.208)                                      | [M+H] <sup>+</sup> | 299.0910              | 299.0919             | -3.11            | 299.0929, 269.0462, 255.0669, 284.0699                     | 5.97             | II               |
| 119      | 15.632   | C <sub>15</sub> H <sub>8</sub> O <sub>6</sub>  | Munjistin (CLogP: 4.339)                                                  | [M+H] <sup>+</sup> | 285.0394              | 285.0393             | 0.32             | 285.0412, 227.0361,                                        | 5.84             | II               |

| Peak no. | RT (min) | Formula                                        | Identification                                                        | Adduct ion         | Experimental mass m/z | Theoretical mass m/z | Mass error (ppm) | Fragment ions                                          | Score (max = 10) | Confidence level |
|----------|----------|------------------------------------------------|-----------------------------------------------------------------------|--------------------|-----------------------|----------------------|------------------|--------------------------------------------------------|------------------|------------------|
| 122      | 16.035   | C <sub>15</sub> H <sub>8</sub> O <sub>5</sub>  | 7-Hydroxyanthra[1,2- <i>d</i> ]-1,3-dioxole-6,11-dione (CLogP: 3.660) | [M+H] <sup>+</sup> | 269.0443              | 269.0444             | -0.37            | 257.0462<br>269.0460, 241.0523,<br>213.0562            | 6.86             | II               |
| 123      | 16.163   | C <sub>17</sub> H <sub>14</sub> O <sub>4</sub> | 1,5-Dimethoxyl-2-methyl-anthraquinone (CLogP: 3.998)                  | [M+H] <sup>+</sup> | 283.0967              | 283.0964             | 1.17             | 283.0989, 239.0722,<br>268.0757, 165.0713,<br>222.0699 | 5.66             | II               |
| 124      | 16.302   | C <sub>15</sub> H <sub>8</sub> O <sub>4</sub>  | Morindaparvin A                                                       | [M+H] <sup>+</sup> | 253.0488              | 253.0495             | -2.49            | 253.0513, 225.0567,<br>197.1192, 139.0559,<br>167.0512 | 5.74             | II               |
| 126      | 16.678   | C <sub>17</sub> H <sub>14</sub> O <sub>6</sub> | 1,3-Dihydroxyl-5,6-dimethoxyl-2-methyl-anthraquinone (CLogP: 3.210)   | [M+H] <sup>+</sup> | 315.0857              | 315.0862             | -1.61            | 315.0879, 285.0417,<br>271.0624, 300.0655,<br>257.0465 | 6.19             | II               |
| 127      | 16.832   | C <sub>16</sub> H <sub>12</sub> O <sub>3</sub> | 1-Methoxyl-2-methyl-anthraquinone (CLogP: 4.037)                      | [M+H] <sup>+</sup> | 253.0865              | 253.0858             | 2.43             | 253.0878, 238.0643,<br>181.0663, 141.0564,<br>221.0613 | 6.08             | II               |
| 128      | 16.899   | C <sub>15</sub> H <sub>10</sub> O <sub>4</sub> | Rubiadin                                                              | [M+H] <sup>+</sup> | 255.0648              | 255.0651             | -1.29            | 255.0658, 199.0406,<br>171.0461, 152.0642              | 6.16             | I                |
| 130      | 17.225   | C <sub>21</sub> H <sub>18</sub> O <sub>6</sub> | Siameaquinones-A                                                      | [M+H] <sup>+</sup> | 367.1188              | 367.1175             | 3.40             | 268.0388, 311.0569,<br>283.0627, 255.0671,<br>227.0712 | 6.27             | II               |
| 132      | 17.498   | C <sub>18</sub> H <sub>16</sub> O <sub>5</sub> | 3-Hydroxyl-1-methoxyl-2-carboxy-anthraquinone                         | [M+H] <sup>+</sup> | 313.1077              | 313.1070             | 2.24             | 313.1085, 269.0828,<br>283.0627, 298.0859,<br>255.0669 | 6.02             | II               |
| 133      | 17.658   | C <sub>16</sub> H <sub>12</sub> O <sub>5</sub> | Digitolutein-5-hydroxyl                                               | [M+H] <sup>+</sup> | 285.0766              | 285.0757             | 3.12             | 285.0785, 229.0523,<br>242.0592                        | 6.97             | II               |
| 134      | 17.677   | C <sub>16</sub> H <sub>12</sub> O <sub>4</sub> | 1-Hydroxyl-2-ethoxy-anthraquinone (CLogP: 4.052)                      | [M+H] <sup>+</sup> | 269.0817              | 269.0808             | 3.46             | 269.0832, 254.0602,<br>226.0646, 198.0697,<br>153.0713 | 6.04             | II               |
| 135      | 17.752   | C <sub>15</sub> H <sub>8</sub> O <sub>3</sub>  | 2-Formylanthraquinone                                                 | [M+H] <sup>+</sup> | 237.0539              | 237.0545             | -2.67            | 237.0560, 209.0614,                                    | 5.62             | II               |

| Peak no. | RT (min) | Formula                                        | Identification                                               | Adduct ion         | Experimental mass m/z | Theoretical mass m/z | Mass error (ppm) | Fragment ions                                          | Score (max = 10) | Confidence level |
|----------|----------|------------------------------------------------|--------------------------------------------------------------|--------------------|-----------------------|----------------------|------------------|--------------------------------------------------------|------------------|------------------|
| 137      | 17.801   | C <sub>19</sub> H <sub>18</sub> O <sub>7</sub> | 1,3-Dihydroxyl-5-methoxyl-2,6-dismethoxymethyl-anthraquinone | [M+H] <sup>+</sup> | 359.1126              | 359.1125             | 0.41             | 152.0638, 181.0667<br>359.1148, 329.0676,<br>344.0924  | 6.86             | II               |
| 138      | 17.994   | C <sub>16</sub> H <sub>10</sub> O <sub>5</sub> | 7-Methoxyanthra[1,2- <i>d</i> ]-1,3-dioxole-6,11-dione       | [M+H] <sup>+</sup> | 283.0600              | 283.0600             | -0.07            | 283.0621, 255.0313,<br>240.0447                        | 5.89             | II               |
| 139      | 18.305   | C <sub>17</sub> H <sub>14</sub> O <sub>4</sub> | Chrysophanol-1,8-dimethoxyl (CLogP: 3.998)                   | [M+H] <sup>+</sup> | 283.0962              | 283.0964             | -0.70            | 251.0717, 283.0974,<br>223.0769, 205.0673,<br>177.0717 | 5.90             | II               |
| 143      | 20.173   | C <sub>15</sub> H <sub>10</sub> O <sub>3</sub> | 1-Hydroxy-2-methylanthraquinone (CLogP: 4.239)               | [M+H] <sup>+</sup> | 239.0705              | 239.0702             | 1.20             | 239.0721, 165.0714,<br>211.0774, 193.0669,<br>211.0634 | 6.60             | II               |
| 144      | 20.293   | C <sub>16</sub> H <sub>12</sub> O <sub>5</sub> | Damnacanthol (CLogP: 5.894)                                  | [M+H] <sup>+</sup> | 285.0763              | 285.0757             | 2.13             | 267.0668, 181.0668,<br>152.0650, 285.0802,<br>232.0415 | 5.74             | II               |
| 150      | 21.380   | C <sub>16</sub> H <sub>12</sub> O <sub>5</sub> | Physcion                                                     | [M+H] <sup>+</sup> | 285.0751              | 285.0757             | -1.86            | 285.0765, 242.0599,<br>211.0773                        | 6.32             | I                |
| 151      | 21.442   | C <sub>17</sub> H <sub>14</sub> O <sub>3</sub> | 1-Hydroxyl-8-methoxyl-2-methyl-anthraquinone                 | [M+H] <sup>+</sup> | 267.1015              | 267.1015             | -0.13            | 252.0805, 208.0906,<br>237.0568, 224.0846,<br>193.0672 | 5.58             | II               |
| 154      | 22.531   | C <sub>18</sub> H <sub>16</sub> O <sub>7</sub> | Obtusin-6-hydroxyl-2-methoxyl                                | [M+H] <sup>+</sup> | 345.0975              | 345.0968             | 2.12             | 345.0993, 327.0878,<br>233.0831, 261.0782,<br>303.0876 | 6.31             | II               |
| 156      | 22.648   | C <sub>16</sub> H <sub>12</sub> O <sub>7</sub> | Aurantio-obtusin-1-hydroxyl                                  | [M+H] <sup>+</sup> | 407.1857              | 407.1852             | 1.08             | 295.0622, 351.1247,<br>407.1874                        | 6.37             | II               |
| 160      | 23.915   | C <sub>16</sub> H <sub>12</sub> O <sub>3</sub> | 3-Hydroxyl-1,2-dimethyl-anthraquinone (CLogP: 4.228)         | [M+H] <sup>+</sup> | 253.0860              | 253.0865             | -1.83            | 197.1198, 141.0553,<br>225.0925, 179.1100,<br>95.0503  | 5.29             | II               |
| 175      | 28.703   | C <sub>26</sub> H <sub>28</sub> O <sub>4</sub> | Emodin-6-geranyloxy                                          | [M+H] <sup>+</sup> | 405.2052              | 405.2060             | -1.97            | 337.1446, 233.0824,<br>131.0504, 219.1037,             | 6.03             | II               |

| Peak no.         | RT (min) | Formula                                         | Identification            | Adduct ion         | Experimental mass m/z | Theoretical mass m/z | Mass error (ppm) | Fragment ions                                    | Score (max = 10) | Confidence level |
|------------------|----------|-------------------------------------------------|---------------------------|--------------------|-----------------------|----------------------|------------------|--------------------------------------------------|------------------|------------------|
|                  |          |                                                 |                           |                    |                       |                      |                  | 295.1349                                         |                  |                  |
| Phenylpropanoids |          |                                                 |                           |                    |                       |                      |                  |                                                  |                  |                  |
| 6                | 1.215    | C <sub>9</sub> H <sub>8</sub> O <sub>3</sub>    | <i>o</i> -Coumaric acid   | [M+H] <sup>+</sup> | 165.0552              | 165.0545             | 4.16             | 91.0558, 119.0495, 147.0454                      | 5.80             | II               |
| 8                | 1.725    | C <sub>27</sub> H <sub>30</sub> O <sub>15</sub> | Epoxymethoxygaertneroside | [M+H] <sup>+</sup> | 595.1668              | 595.1657             | 1.90             | 595.1675, 457.1150, 577.1538, 379.0847           | 6.51             | II               |
| 17               | 3.088    | C <sub>9</sub> H <sub>8</sub> O <sub>3</sub>    | <i>p</i> -Coumaric acid   | [M+H] <sup>+</sup> | 165.0553              | 165.0545             | 4.82             | 91.0555, 119.0547, 79.0576, 107.0503, 147.0468   | 6.33             | II               |
| 19               | 3.245    | C <sub>14</sub> H <sub>6</sub> O <sub>8</sub>   | Ellagic acid              | [M+H] <sup>+</sup> | 303.0138              | 303.0135             | 1.07             | 303.0154, 257.0100, 275.0205                     | 6.14             | II               |
| 22               | 3.336    | C <sub>9</sub> H <sub>8</sub> O <sub>3</sub>    | <i>m</i> -Coumaric acid   | [M+H] <sup>+</sup> | 165.0551              | 165.0545             | 3.19             | 79.0557, 135.0457, 121.0295, 147.0466            | 6.63             | II               |
| 25               | 3.751    | C <sub>11</sub> H <sub>12</sub> O <sub>5</sub>  | Sinapic acid              | [M+H] <sup>+</sup> | 225.0761              | 225.0757             | 1.72             | 207.0668, 175.0408, 147.0456, 119.0509, 91.0556  | 6.92             | II               |
| 26               | 3.775    | C <sub>10</sub> H <sub>10</sub> O <sub>4</sub>  | Ferulic acid              | [M+H] <sup>+</sup> | 195.0653              | 195.0657             | -2.25            | 177.0557, 145.0296, 83.0396, 117.0349, 134.0378  | 7.22             | II               |
| 32               | 4.735    | C <sub>25</sub> H <sub>26</sub> O <sub>13</sub> | Gaertneric acid           | [M+H] <sup>+</sup> | 535.1453              | 535.1445             | 1.36             | 163.0406, 147.0464, 193.0523, 535.2736, 175.0407 | 6.71             | II               |
| 33               | 4.951    | C <sub>10</sub> H <sub>10</sub> O <sub>3</sub>  | Coniferaldehyde           | [M+H] <sup>+</sup> | 179.0700              | 179.0702             | -1.25            | 147.0459, 91.0556, 161.0619, 119.0507, 133.0668  | 7.01             | II               |
| 34               | 4.970    | C <sub>11</sub> H <sub>12</sub> O <sub>4</sub>  | Methyl ferulate           | [M+H] <sup>+</sup> | 209.0802              | 209.0808             | -2.53            | 177.0569, 191.0725, 149.0614, 91.0558, 55.0192   | 7.26             | II               |

| Peak no.      | RT (min) | Formula                                        | Identification                                     | Adduct ion         | Experimental mass m/z | Theoretical mass m/z | Mass error (ppm) | Fragment ions                                     | Score (max = 10) | Confidence level |
|---------------|----------|------------------------------------------------|----------------------------------------------------|--------------------|-----------------------|----------------------|------------------|---------------------------------------------------|------------------|------------------|
| 65            | 10.698   | C <sub>10</sub> H <sub>10</sub> O <sub>3</sub> | 4-Methoxycinnamic acid                             | [M+H] <sup>+</sup> | 179.0704              | 179.0702             | 0.93             | 161.0614, 133.0667, 105.0714, 179.0718            | 6.6              | II               |
| 157           | 23.002   | C <sub>9</sub> H <sub>6</sub> O <sub>4</sub>   | 5,7-Dihydroxychromone                              | [M+H] <sup>+</sup> | 179.0344              | 179.0338             | 3.35             | 179.0363, 136.0232, 93.0349                       | 6.07             | II               |
| Triterpenoids |          |                                                |                                                    |                    |                       |                      |                  |                                                   |                  |                  |
| 121           | 16.008   | C <sub>30</sub> H <sub>48</sub> O <sub>6</sub> | Clethric acid                                      | [M+H] <sup>+</sup> | 505.3527              | 505.3523             | 0.81             | 423.3258, 469.3340, 187.1494, 223.1709, 487.3454  | 6.81             | II               |
| 155           | 22.639   | C <sub>30</sub> H <sub>48</sub> O <sub>5</sub> | Barbinervic acid                                   | [M+H] <sup>+</sup> | 489.3579              | 489.3574             | 0.97             | 425.3430, 471.3481, 235.1715, 189.1656, 95.0868   | 6.81             | II               |
| 159           | 23.680   | C <sub>30</sub> H <sub>50</sub> O <sub>2</sub> | Betulin                                            | [M+H] <sup>+</sup> | 443.3886              | 443.3883             | 0.63             | 443.3897, 425.3812, 191.1818, 147.1189, 339.3059  | 7.23             | II               |
| 161           | 24.581   | C <sub>32</sub> H <sub>50</sub> O <sub>4</sub> | Oleanolic acid                                     | [M+H] <sup>+</sup> | 457.3680              | 457.3682             | -0.33            | 457.3695, 203.1816, 439.3591, 249.1868, 135.1182  | 7.33             | II               |
| 163           | 25.134   | C <sub>30</sub> H <sub>48</sub> O <sub>3</sub> | Ursolic acid                                       | [M+H] <sup>+</sup> | 457.3681              | 457.3676             | 1.16             | 457.3693, 191.1814, 411.3637                      | 7.07             | II               |
| 166           | 26.145   | C <sub>32</sub> H <sub>50</sub> O <sub>5</sub> | (3β)-3-(Acetyloxy)-19-hydroxyurs-12-en-28-oic acid | [M+H] <sup>+</sup> | 515.3737              | 515.3730             | 1.27             | 189.1661, 437.3453, 409.3484, 191.1814, 409.3839, | 7.08             | II               |
| 169           | 27.687   | C <sub>30</sub> H <sub>50</sub> O              | α-Amyrin                                           | [M+H] <sup>+</sup> | 427.3932              | 427.3934             | -0.32            | 137.1343, 109.1024, 163.1500                      | 6.87             | II               |
| 172           | 28.036   | C <sub>30</sub> H <sub>48</sub> O <sub>4</sub> | Hederagenin                                        | [M+H] <sup>+</sup> | 473.3629              | 473.3625             | 0.91             | 473.3646, 427.3571, 189.1649, 235.1709, 371.2986  | 6.67             | II               |
| 174           | 28.596   | C <sub>32</sub> H <sub>50</sub> O <sub>4</sub> | Oleanolic acid acetate                             | [M+H] <sup>+</sup> | 499.3786              | 499.3781             | 1.00             | 191.1797, 439.3564, 203.1801, 249.1864,           | 7.32             | II               |

| Peak no.         | RT (min) | Formula                                         | Identification                                                 | Adduct ion         | Experimental mass m/z | Theoretical mass m/z | Mass error (ppm) | Fragment ions                                    | Score (max = 10) | Confidence level |
|------------------|----------|-------------------------------------------------|----------------------------------------------------------------|--------------------|-----------------------|----------------------|------------------|--------------------------------------------------|------------------|------------------|
|                  |          |                                                 |                                                                |                    |                       |                      |                  | 393.3540                                         |                  |                  |
| Terpenoids       |          |                                                 |                                                                |                    |                       |                      |                  |                                                  |                  |                  |
| 20               | 3.254    | C <sub>13</sub> H <sub>20</sub> O <sub>2</sub>  | 4-(1-Hydroxy-2,6,6-trimethyl-2-cyclohexen-1-yl)-3-buten-2-one  | [M+H] <sup>+</sup> | 209.1537              | 209.1535             | 0.86             | 149.0973, 209.1551, 125.0972, 107.0874, 191.1449 | 7.20             | II               |
| 21               | 3.260    | C <sub>13</sub> H <sub>18</sub> O <sub>2</sub>  | 4-Oxo-β-ionone                                                 | [M+H] <sup>+</sup> | 207.1384              | 207.1379             | 2.37             | 95.0870, 149.0981, 65.0558, 207.1402, 149.0981   | 6.78             | II               |
| 28               | 4.028    | C <sub>20</sub> H <sub>22</sub> O <sub>6</sub>  | Pinoresinol                                                    | [M+H] <sup>+</sup> | 359.1498              | 359.1494             | 1.03             | 137.0619, 175.0774, 205.0876, 161.0619           | 6.82             | II               |
| 31               | 4.726    | C <sub>13</sub> H <sub>20</sub> O <sub>2</sub>  | 4-(1-Hydroxy-2,2-dimethyl-6-methylenecyclohexyl)-3-buten-2-one | [M+H] <sup>+</sup> | 209.1535              | 209.1535             | -0.29            | 209.1549, 83.0141, 139.0766, 125.0980, 191.1447  | 6.33             | II               |
| 39               | 6.469    | C <sub>27</sub> H <sub>28</sub> O <sub>14</sub> | Gaertneroside                                                  | [M+H] <sup>+</sup> | 549.1600              | 549.1608             | -1.39            | 177.0559, 147.0454, 387.1091, 549.1621           | 6.88             | II               |
| 49               | 8.825    | C <sub>20</sub> H <sub>20</sub> O <sub>6</sub>  | Balanophonin                                                   | [M+H] <sup>+</sup> | 357.1331              | 357.1332             | -0.28            | 307.0982, 321.1147, 339.1250, 247.0779, 289.0871 | 6.44             | II               |
| 142              | 19.590   | C <sub>13</sub> H <sub>20</sub> O               | 4-(2,2-Dimethyl-6-methylenecyclohexylidene)-2-butanone         | [M+H] <sup>+</sup> | 193.1590              | 193.1586             | 1.99             | 193.1605, 109.0669, 69.0713, 135.1187, 175.1498  | 6.84             | II               |
| 145              | 20.406   | C <sub>20</sub> H <sub>28</sub> O <sub>2</sub>  | 5,6-Epoxy-5,6-dihydroretinal                                   | [M+H] <sup>+</sup> | 301.2167              | 301.2161             | 1.76             | 301.2184, 255.2122, 147.1180, 109.1029, 199.1506 | 6.39             | II               |
| 146              | 20.885   | C <sub>20</sub> H <sub>28</sub> O               | Retinal                                                        | [M+H] <sup>+</sup> | 285.2216              | 285.2212             | 1.31             | 285.2238, 257.2260, 187.1467, 147.1136, 55.0558  | 5.87             | II               |
| Sesquiterpenoids |          |                                                 |                                                                |                    |                       |                      |                  |                                                  |                  |                  |
| 115              | 15.033   | C <sub>18</sub> H <sub>26</sub> O <sub>2</sub>  | 4-Hydroxy-β-apo-13-carotenone                                  | [M+H] <sup>+</sup> | 275.2007              | 275.2005             | 0.73             | 135.0821, 173.1341,                              | 6.75             | II               |

| Peak no.    | RT (min) | Formula                                                       | Identification                  | Adduct ion         | Experimental mass m/z | Theoretical mass m/z | Mass error (ppm) | Fragment ions                                                                 | Score (max = 10) | Confidence level |
|-------------|----------|---------------------------------------------------------------|---------------------------------|--------------------|-----------------------|----------------------|------------------|-------------------------------------------------------------------------------|------------------|------------------|
| 125         | 16.580   | C <sub>18</sub> H <sub>26</sub> O <sub>2</sub>                | β-Apo-13-carotenone 5,6-epoxide | [M+H] <sup>+</sup> | 275.2008              | 275.2005             | 1.24             | 159.1191, 257.1915, 95.0870, 133.1029, 149.0251, 161.0977, 121.0661, 257.1931 | 6.61             | II               |
| 136         | 17.781   | C <sub>15</sub> H <sub>20</sub> O <sub>2</sub>                | 4-Oxo-β-ionylideneacetaldehyde  | [M+H] <sup>+</sup> | 233.1539              | 233.1535             | 1.46             | 233.1556, 175.0766, 145.1018                                                  | 6.26             | II               |
| 140         | 18.913   | C <sub>15</sub> H <sub>22</sub> O                             | β-Ionylideneacetaldehyde        | [M+H] <sup>+</sup> | 219.1737              | 219.1743             | -2.44            | 135.0822, 121.0664, 81.0714, 203.1449, 93.0714                                | 6.85             | II               |
| 165         | 25.827   | C <sub>18</sub> H <sub>26</sub> O                             | β-Apo-13-carotenone             | [M+H] <sup>+</sup> | 259.2057              | 259.2056             | 0.67             | 175.1502, 161.1342, 133.1029, 259.2082, 119.0871                              | 6.79             | II               |
| Alkaloids   |          |                                                               |                                 |                    |                       |                      |                  |                                                                               |                  |                  |
| 9           | 1.727    | C <sub>8</sub> H <sub>10</sub> N <sub>4</sub> O <sub>2</sub>  | Caffeine                        | [M+H] <sup>+</sup> | 195.0867              | 195.0876             | -4.33            | 195.0888, 138.0674, 110.0727                                                  | 6.70             | II               |
| 23          | 3.518    | C <sub>10</sub> H <sub>13</sub> NO <sub>2</sub>               | Phenacetin                      | [M+H] <sup>+</sup> | 180.1019              | 180.1018             | 0.51             | 162.0930, 112.0776, 138.0932, 120.0827, 69.0350                               | 5.99             | II               |
| 171         | 27.927   | C <sub>35</sub> H <sub>36</sub> N <sub>4</sub> O <sub>5</sub> | Pheophorbide a                  | [M+H] <sup>+</sup> | 593.2733              | 593.2758             | -4.10            | 593.2722, 533.2527, 460.2266                                                  | 6.52             | II               |
| 176         | 29.136   | C <sub>36</sub> H <sub>38</sub> N <sub>4</sub> O <sub>6</sub> | Methyl-21-hydroxypheophorbide a | [M+H] <sup>+</sup> | 623.2854              | 623.2863             | -1.56            | 623.2837, 605.2741, 545.2541, 573.2501, 591.2603                              | 6.63             | II               |
| Fatty acids |          |                                                               |                                 |                    |                       |                      |                  |                                                                               |                  |                  |
| 141         | 19.189   | C <sub>18</sub> H <sub>28</sub> O <sub>2</sub>                | Stearidonic acid                | [M+H] <sup>+</sup> | 277.2155              | 277.2161             | -2.24            | 93.0704, 79.0550, 135.1177, 107.0869, 121.1023                                | 6.69             | II               |
| 147         | 20.899   | C <sub>20</sub> H <sub>30</sub> O <sub>2</sub>                | Timnodonic acid                 | [M+H] <sup>+</sup> | 303.2310              | 303.2318             | -2.74            | 257.2276, 147.1183,                                                           | 6.83             | II               |

| Peak no.      | RT (min) | Formula                                        | Identification                                   | Adduct ion         | Experimental mass m/z | Theoretical mass m/z | Mass error (ppm) | Fragment ions                                                                                    | Score (max = 10) | Confidence level |
|---------------|----------|------------------------------------------------|--------------------------------------------------|--------------------|-----------------------|----------------------|------------------|--------------------------------------------------------------------------------------------------|------------------|------------------|
| 148           | 21.041   | C <sub>18</sub> H <sub>32</sub> O <sub>2</sub> | Linoleic acid                                    | [M+H] <sup>+</sup> | 281.2465              | 281.2474             | -3.17            | 201.1650, 133.1031, 81.0712<br>55.0554, 69.0713, 83.0868, 95.0872, 263.2400<br>67.0556, 81.0717, | 6.56             | II               |
| 158           | 23.284   | C <sub>20</sub> H <sub>34</sub> O <sub>2</sub> | Dihomo-γ-linolenic acid                          | [M+H] <sup>+</sup> | 307.2634              | 307.2631             | 1.11             | 95.0856, 307.2627, 289.2627<br>149.0245, 81.0706,                                                | 5.95             | II               |
| 164           | 25.767   | C <sub>18</sub> H <sub>30</sub> O <sub>2</sub> | Linolenic acid                                   | [M+H] <sup>+</sup> | 279.2309              | 279.2318             | -3.08            | 95.0864, 67.0548, 109.1022                                                                       | 6.76             | II               |
| Organic acids |          |                                                |                                                  |                    |                       |                      |                  |                                                                                                  |                  |                  |
| 12            | 2.197    | C <sub>8</sub> H <sub>8</sub> O <sub>4</sub>   | Vanillic acid                                    | [M+H] <sup>+</sup> | 169.0497              | 169.0495             | 1.25             | 65.0400, 111.0461, 141.0566, 125.0617, 169.0515<br>255.2123, 301.2180,                           | 6.69             | II               |
| 129           | 16.964   | C <sub>20</sub> H <sub>28</sub> O <sub>2</sub> | Retinoic acid                                    | [M+H] <sup>+</sup> | 301.2157              | 301.2161             | -1.30            | 199.1502, 133.1030, 240.1892<br>181.0515, 166.0280, 138.0328<br>179.1437, 135.1184,              | 6.85             | II               |
| 131           | 17.281   | C <sub>9</sub> H <sub>8</sub> O <sub>4</sub>   | Aspirin                                          | [M+H] <sup>+</sup> | 181.0499              | 181.0495             | 2.44             | 93.0714, 81.0711, 151.1134, 67.0554<br>277.2173, 151.1130,                                       | 6.00             | II               |
| 149           | 21.222   | C <sub>18</sub> H <sub>30</sub> O <sub>3</sub> | 13-KODE                                          | [M+H] <sup>+</sup> | 295.2263              | 295.4428             | -3.39            | 81.0347, 95.0507, 67.0556                                                                        | 6.58             | II               |
| 152           | 21.703   | C <sub>18</sub> H <sub>30</sub> O <sub>3</sub> | 13-HOTE                                          | [M+H] <sup>+</sup> | 295.2262              | 295.2267             | -1.57            |                                                                                                  | 6.74             | II               |
| Steroids      |          |                                                |                                                  |                    |                       |                      |                  |                                                                                                  |                  |                  |
| 170           | 27.832   | C <sub>28</sub> H <sub>44</sub> O <sub>3</sub> | 5α,8α-Epidioxy-24-methylcholesta-6,22-dien-3β-ol | [M+H] <sup>+</sup> | 429.3369              | 429.3362             | 1.59             | 411.3258, 69.0716, 429.3375, 191.1082,                                                           | 6.69             | II               |

| Peak no.        | RT (min) | Formula                                         | Identification            | Adduct ion         | Experimental mass m/z | Theoretical mass m/z | Mass error (ppm) | Fragment ions                                                    | Score (max = 10) | Confidence level |
|-----------------|----------|-------------------------------------------------|---------------------------|--------------------|-----------------------|----------------------|------------------|------------------------------------------------------------------|------------------|------------------|
| 173             | 28.112   | C <sub>29</sub> H <sub>46</sub> O               | Stigmasta-4,22-dien-3-one | [M+H] <sup>+</sup> | 411.3622              | 411.3621             | 0.35             | 287.2034<br>411.3636, 157.1034,<br>215.1454, 81.0717<br>413.3787 | 6.38             | II               |
| 178             | 29.912   | C <sub>29</sub> H <sub>48</sub> O               | Stigmasterol              | [M+H] <sup>+</sup> | 413.3772              | 413.3777             | -1.15            | 395.3695, 159.1193,<br>131.0873, 213.1652                        | 7.17             | II               |
| Monoterpenoids  |          |                                                 |                           |                    |                       |                      |                  |                                                                  |                  |                  |
| 3               | 0.812    | C <sub>16</sub> H <sub>20</sub> O <sub>10</sub> | Deacetylasperuloside      | [M+H] <sup>+</sup> | 373.1133              | 373.1135             | -0.39            | 175.0404, 147.0458,<br>193.0513, 211.0616,<br>119.0507           | 6.67             | II               |
| 7               | 1.215    | C <sub>18</sub> H <sub>22</sub> O <sub>11</sub> | Asperuloside              | [M+H] <sup>+</sup> | 415.1247              | 415.1234             | 3.18             | 147.0454, 175.0407,<br>193.0515, 165.0572,<br>235.0624, 253.0731 | 6.92             | II               |
| 77              | 11.397   | C <sub>11</sub> H <sub>16</sub> O <sub>2</sub>  | Dihydroactinidiolide      | [M+H] <sup>+</sup> | 181.1212              | 181.1222             | -3.72            | 181.1229, 135.1182,<br>163.1133, 107.0869,<br>93.0712            | 6.37             | II               |
| Flavonoids      |          |                                                 |                           |                    |                       |                      |                  |                                                                  |                  |                  |
| 59              | 10.007   | C <sub>15</sub> H <sub>10</sub> O <sub>6</sub>  | Kaempferol                | [M+H] <sup>+</sup> | 287.0552              | 287.0555             | -1.11            | 287.0568, 153.0202,<br>213.0558                                  | 7.44             | I                |
| 120             | 15.813   | C <sub>16</sub> H <sub>12</sub> O <sub>5</sub>  | Farnisin                  | [M+H] <sup>+</sup> | 285.0756              | 285.0757             | -0.14            | 285.0771, 241.0511,<br>270.0537, 224.0484                        | 6.75             | II               |
| Tetraterpenoids |          |                                                 |                           |                    |                       |                      |                  |                                                                  |                  |                  |
| 162             | 24.749   | C <sub>25</sub> H <sub>34</sub> O               | β-Apo-12'-carotenal       | [M+H] <sup>+</sup> | 351.2688              | 351.2682             | 1.83             | 199.1509, 295.2098,<br>157.1024, 133.1033,<br>241.1997           | 6.34             | II               |
| 167             | 26.149   | C <sub>40</sub> H <sub>56</sub> O <sub>4</sub>  | β-Carotenone              | [M+H] <sup>+</sup> | 601.4219              | 601.4251             | -5.01            | 601.4227, 583.4153,<br>221.1559, 565.4067,<br>167.1087           | 6.11             | II               |
| Amino acids     |          |                                                 |                           |                    |                       |                      |                  |                                                                  |                  |                  |

| Peak no. | RT (min) | Formula                                                     | Identification    | Adduct ion         | Experimental mass m/z | Theoretical mass m/z | Mass error (ppm) | Fragment ions                                                      | Score (max = 10) | Confidence level |
|----------|----------|-------------------------------------------------------------|-------------------|--------------------|-----------------------|----------------------|------------------|--------------------------------------------------------------------|------------------|------------------|
| 1        | 0.779    | C <sub>4</sub> H <sub>8</sub> N <sub>2</sub> O <sub>3</sub> | Asparagine        | [M+H] <sup>+</sup> | 133.0610              | 133.0607             | 2.09             | 133.0627, 74.0244, 87.0564                                         | 7.82             | II               |
| 2        | 0.785    | C <sub>5</sub> H <sub>11</sub> NO <sub>2</sub>              | Valine            | [M+H] <sup>+</sup> | 118.0854              | 118.0862             | -4.93            | 58.0654, 59.0738, 72.0826, 56.0506                                 | 6.14             | II               |
| 5        | 1.068    | C <sub>9</sub> H <sub>11</sub> NO <sub>2</sub>              | Phenylalanine     | [M+H] <sup>+</sup> | 166.0866              | 166.0862             | 2.30             | 103.0556, 91.0555, 93.0714                                         | 6.87             | II               |
| Others   |          |                                                             |                   |                    |                       |                      |                  |                                                                    |                  |                  |
| 24       | 3.645    | C <sub>10</sub> H <sub>8</sub> O <sub>4</sub>               | Scopoletin        | [M+H] <sup>+</sup> | 193.0485              | 193.0495             | -4.97            | 53.0398, 77.0404, 193.0504, 133.0297, 178.0274, 150.0328, 122.0377 | 6.78             | II               |
| 168      | 27.329   | C <sub>19</sub> H <sub>38</sub> O <sub>4</sub>              | 1-Monopalmitin    | [M+H] <sup>+</sup> | 331.2832              | 331.2842             | -2.99            | 57.0703, 313.2740, 57.0703, 95.0865, 239.2376                      | 5.93             | II               |
| 153      | 22.239   | C <sub>8</sub> H <sub>4</sub> O <sub>3</sub>                | Phthalandione     | [M+H] <sup>+</sup> | 149.0225              | 149.0239             | -4.57            | 65.0391, 121.0294, 93.0350, 53.0030, 71.0155                       | 5.31             | II               |
| 177      | 29.716   | C <sub>35</sub> H <sub>42</sub> O <sub>9</sub>              | Morinol A acetate | [M+H] <sup>+</sup> | 607.2894              | 607.7308             | -4.38            | 607.2929, 547.2688, 575.2664, 461.2348, 519.2415                   | 6.52             | II               |

\* The confidence level was determined following the four levels defined by the Metabolomics Standards Initiative. Level I : confidently identified compounds; Level II : Putatively annotated compounds; Level III: putatively annotated compound classes; Level IV: unknown compounds.

**Table S2.** Chemical structures, experiment and predicted MS<sup>2</sup> spectra of all the identified compounds in *Damnacanthus indicus*.

No.1 Asparagine

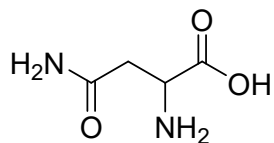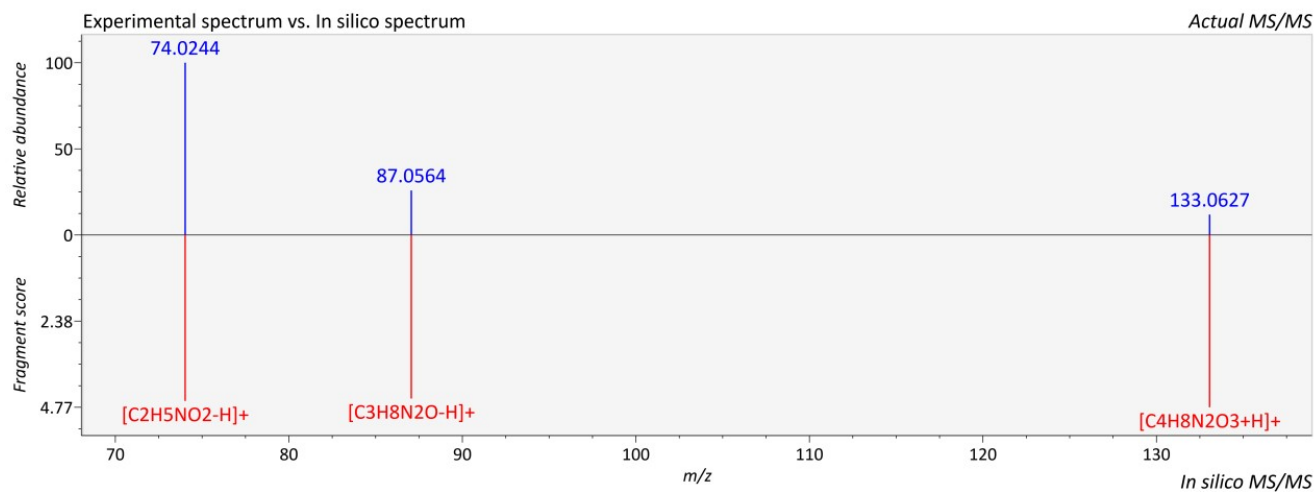

No.2 Valine

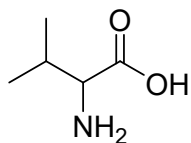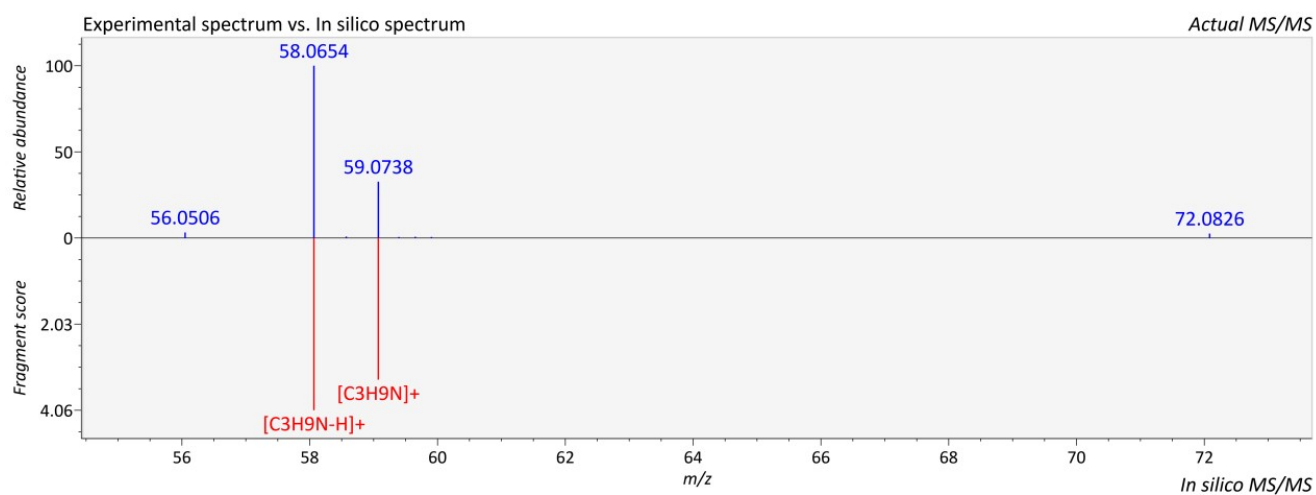

No.3 Deacetylasperuloside

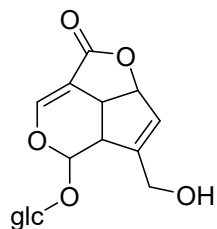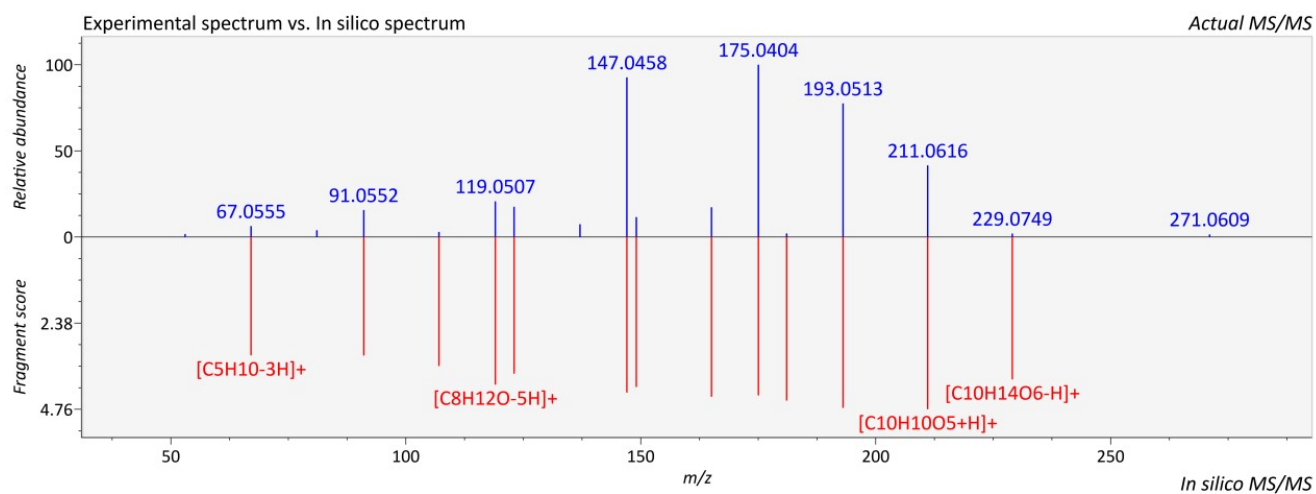

#### No.4 1-O-glucoside-2,6,8-trihydroxyl-3-methyl-anthraquinone

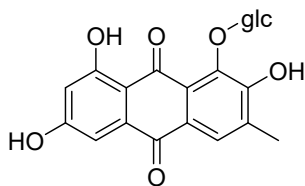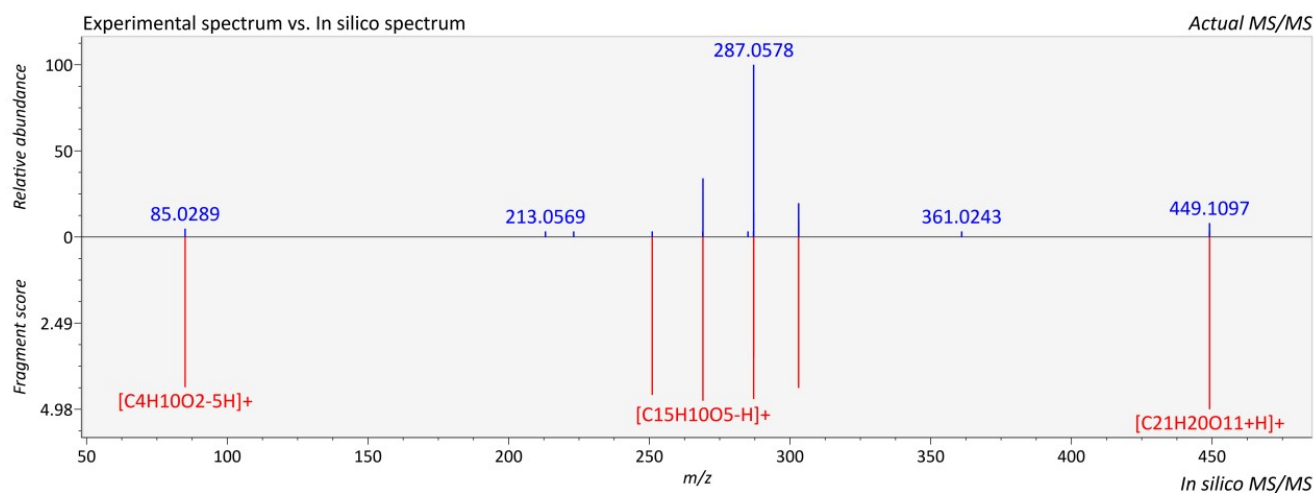

#### No.5 Phenylalanine

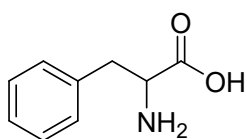

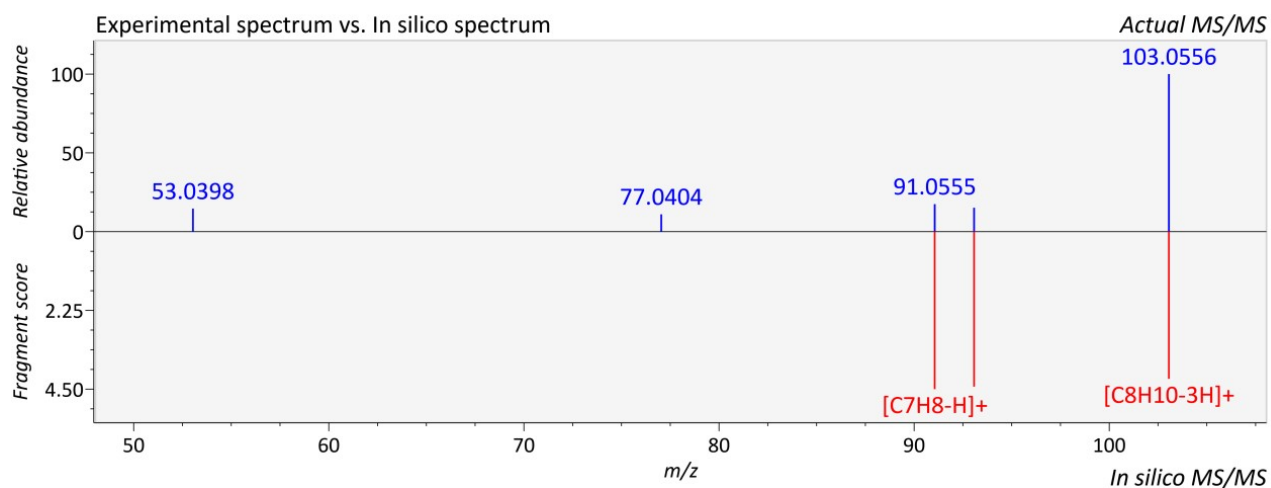

No.6 *o*-Coumaric acid

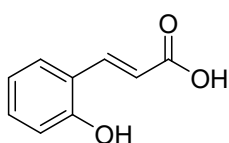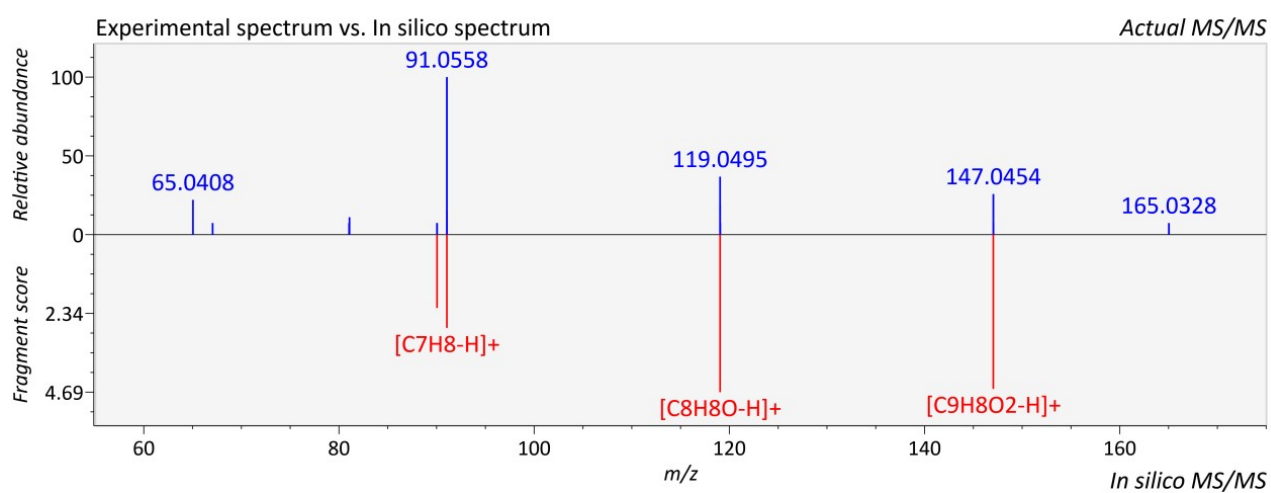

No.7 Asperuloside

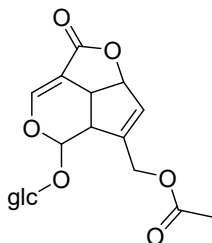

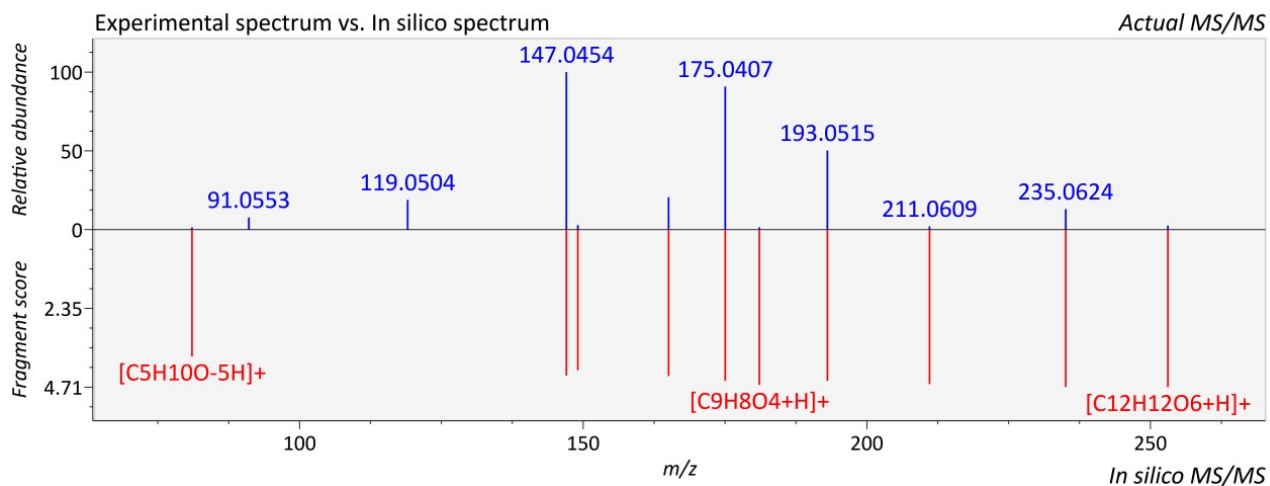

## No.8 Epoxymethoxygaertneroside

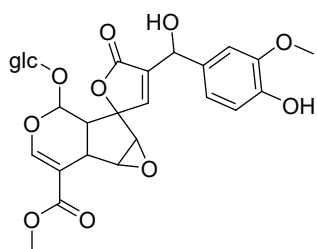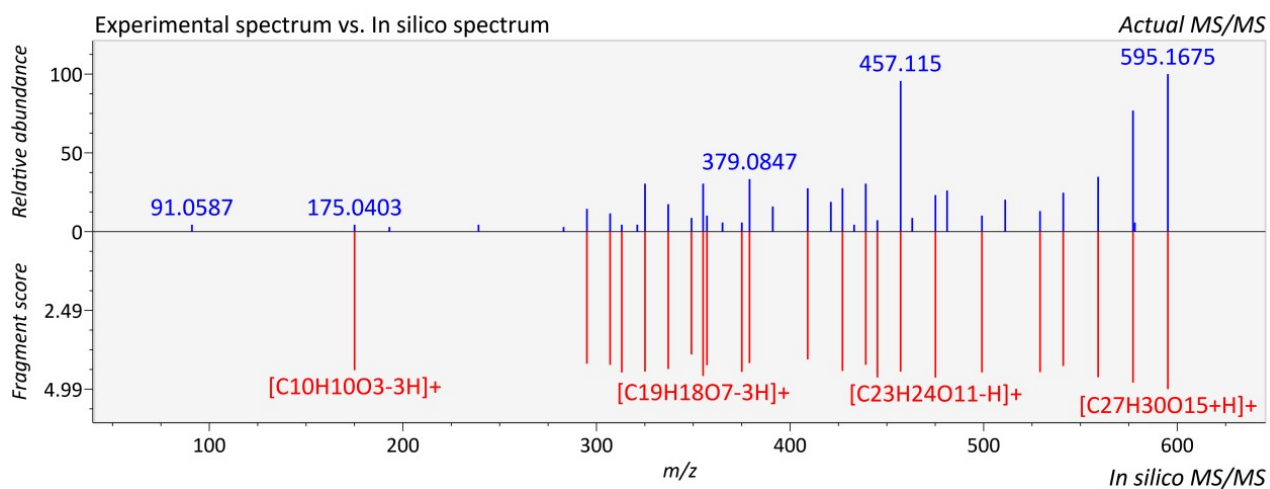

## No.9 Caffeine

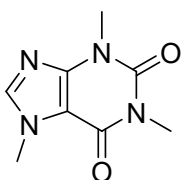

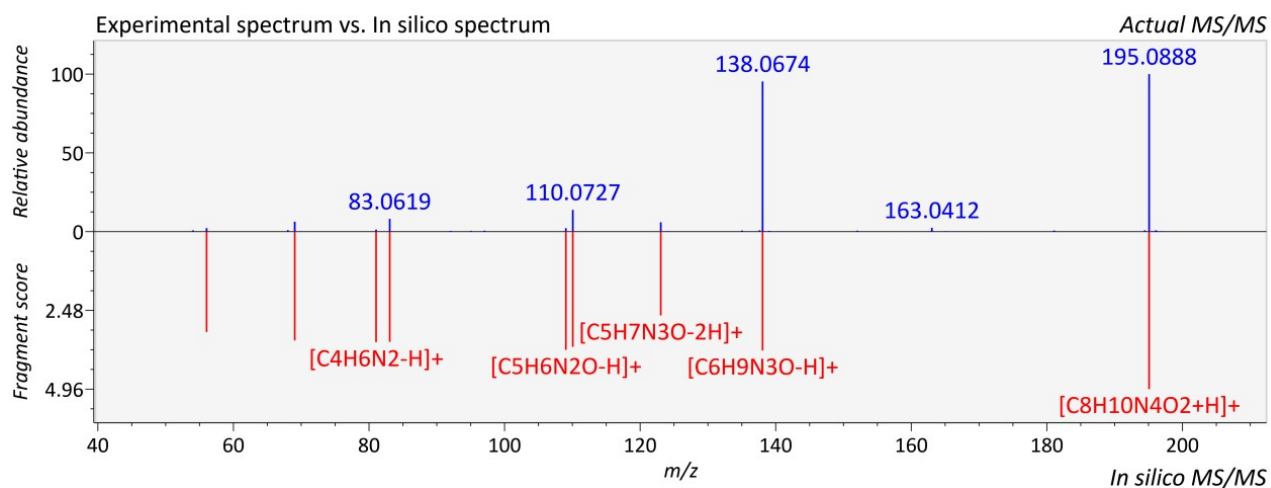

### No.10 Chrysophanein

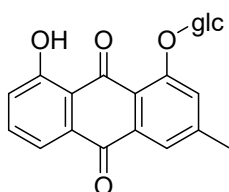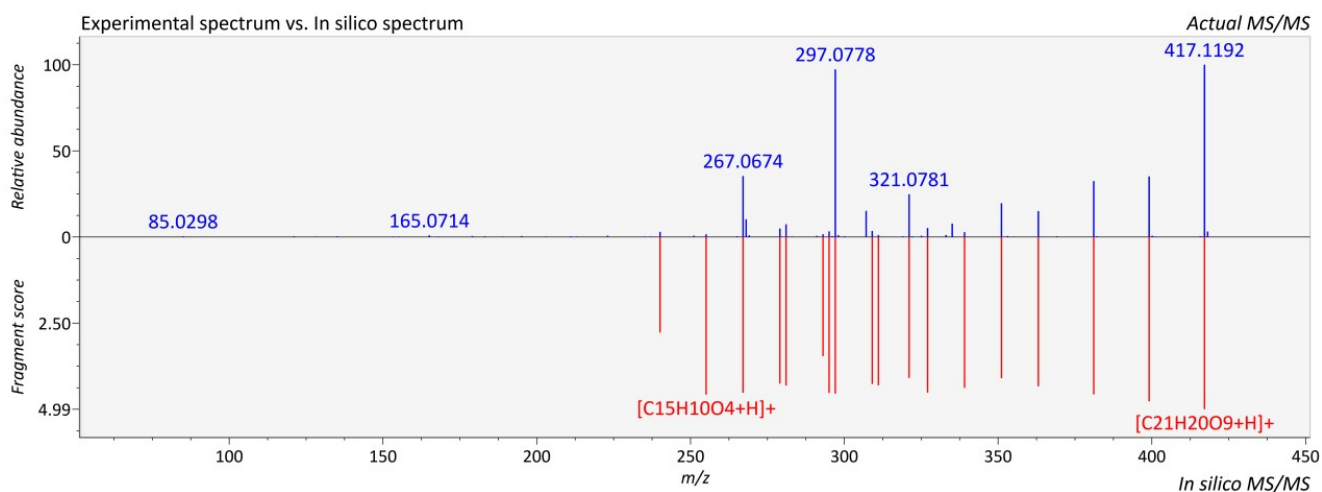

### No.11 Physcion-1-O-glucoside

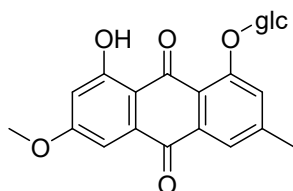

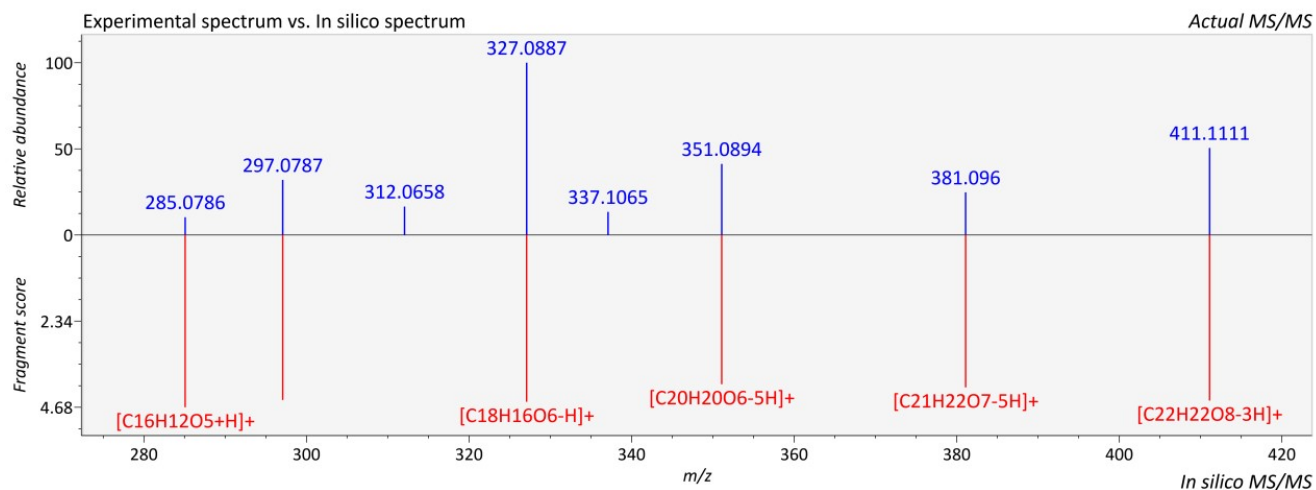

No.12 Vanillic acid

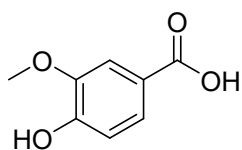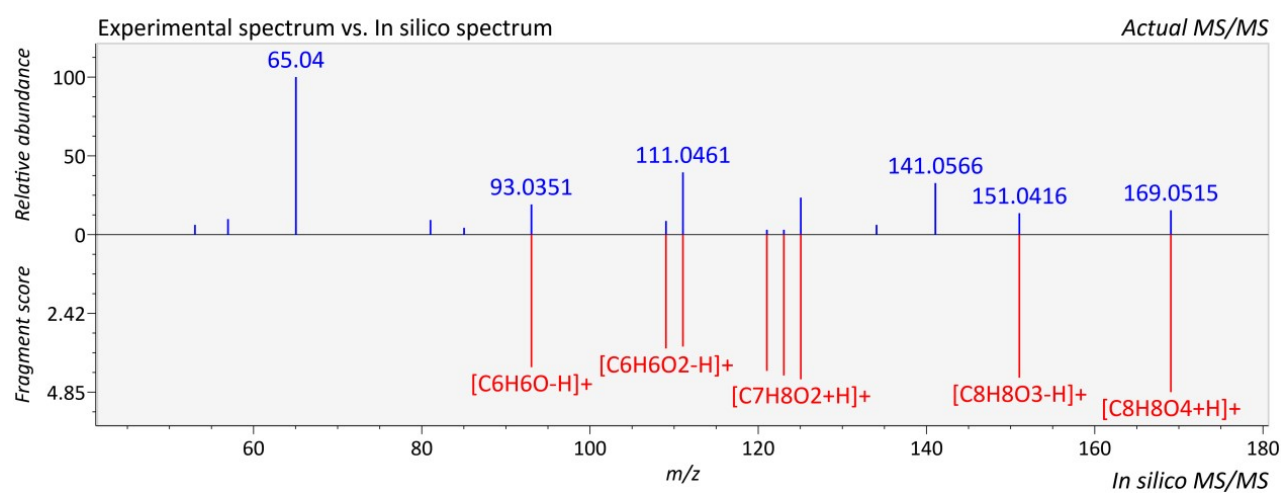

No.13 Aloe-emodin-7-hydroxyl-8-O-glucoside

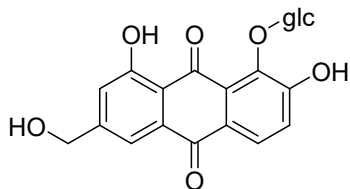

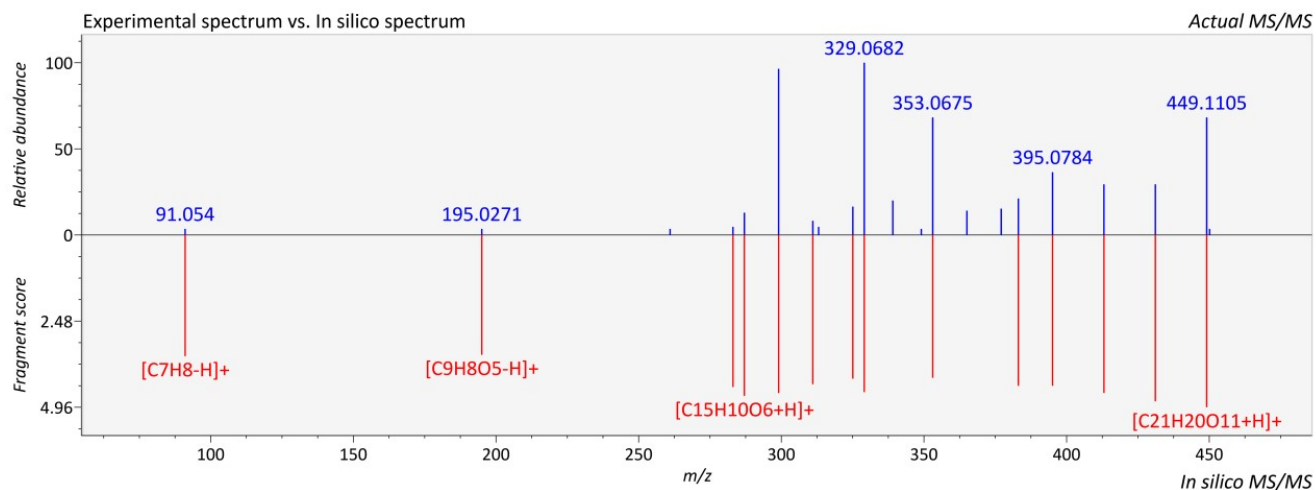

No.14 Rubiadin-1-methoxyl-3-O-primeveroside

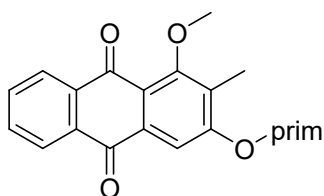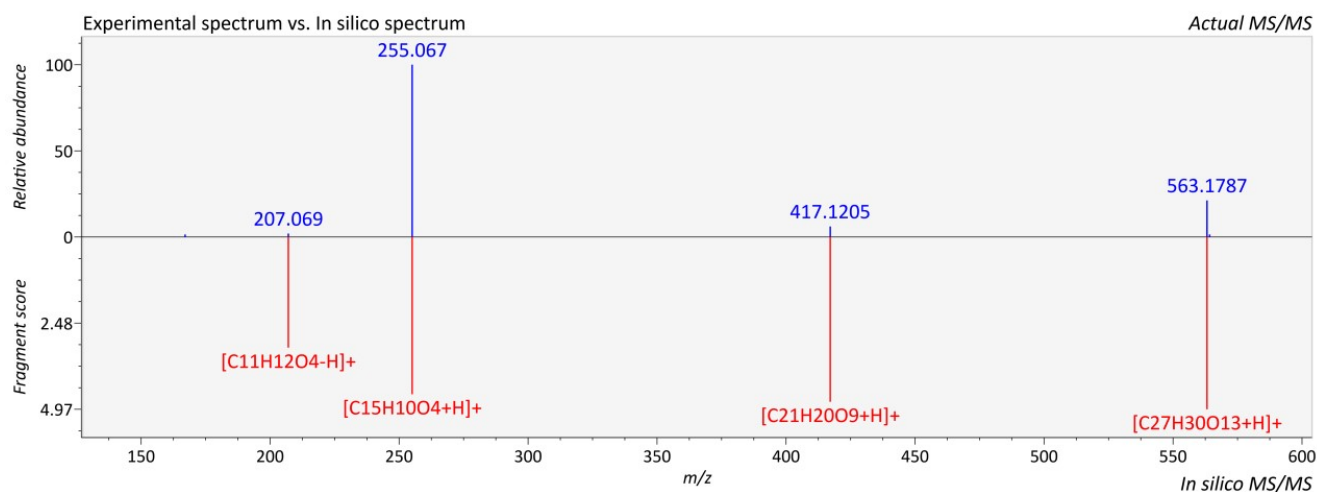

No.15 3-O-glucoside-1,8-dihydroxyl-2-methoxymethyl-anthraquinone

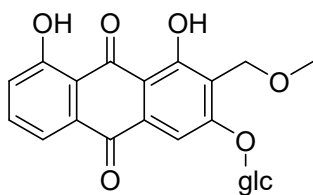

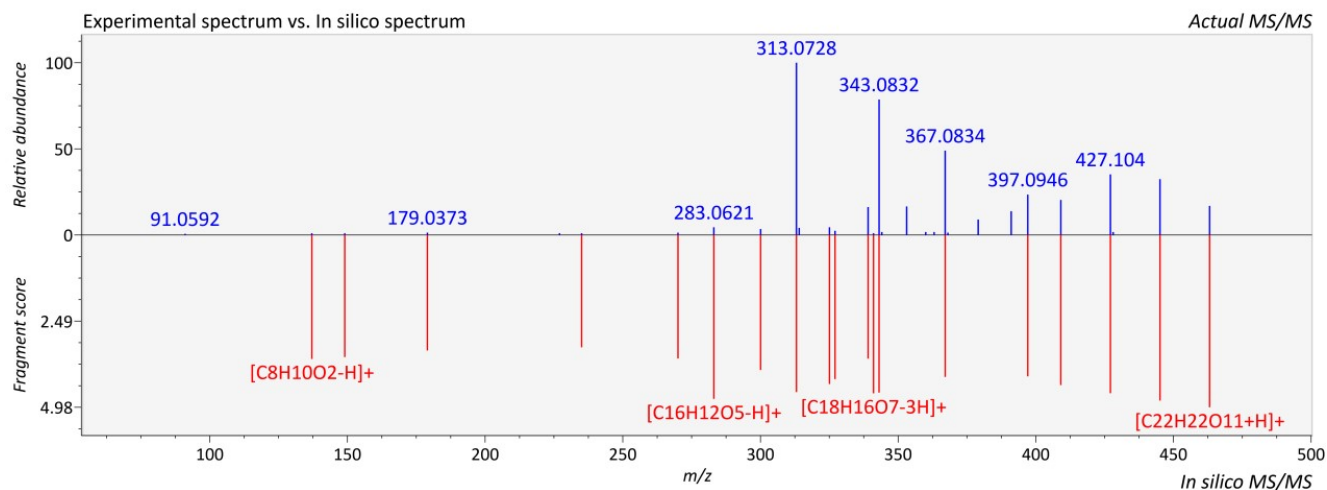

No.16 Emodin-1-O-glucoside

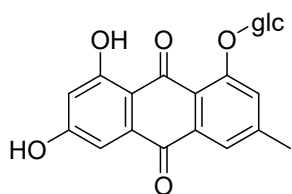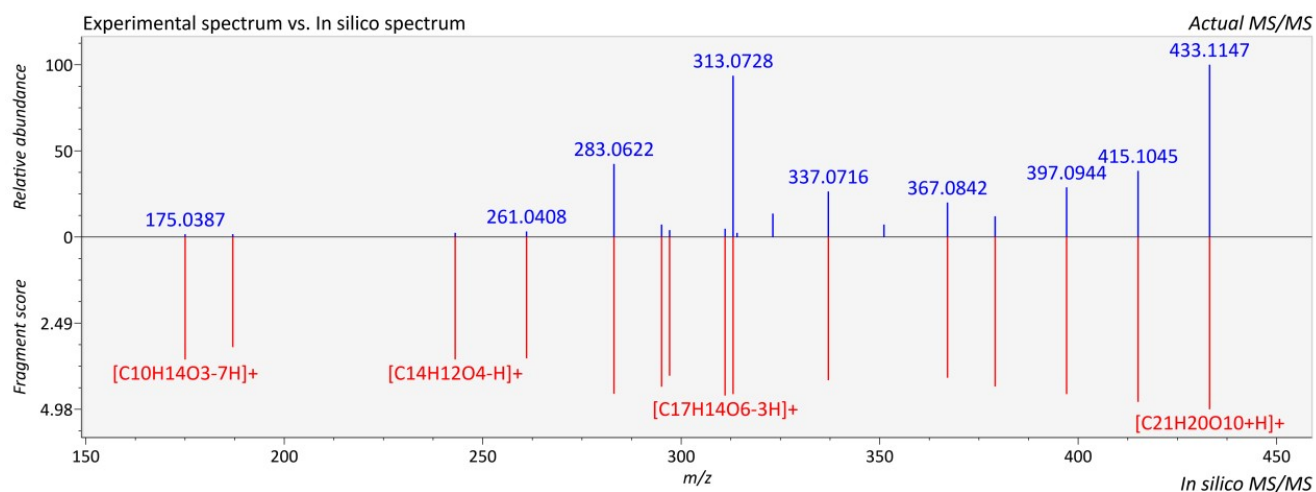

No.17 *p*-Coumaric acid

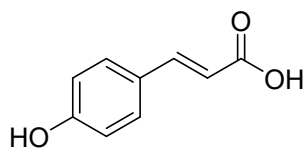

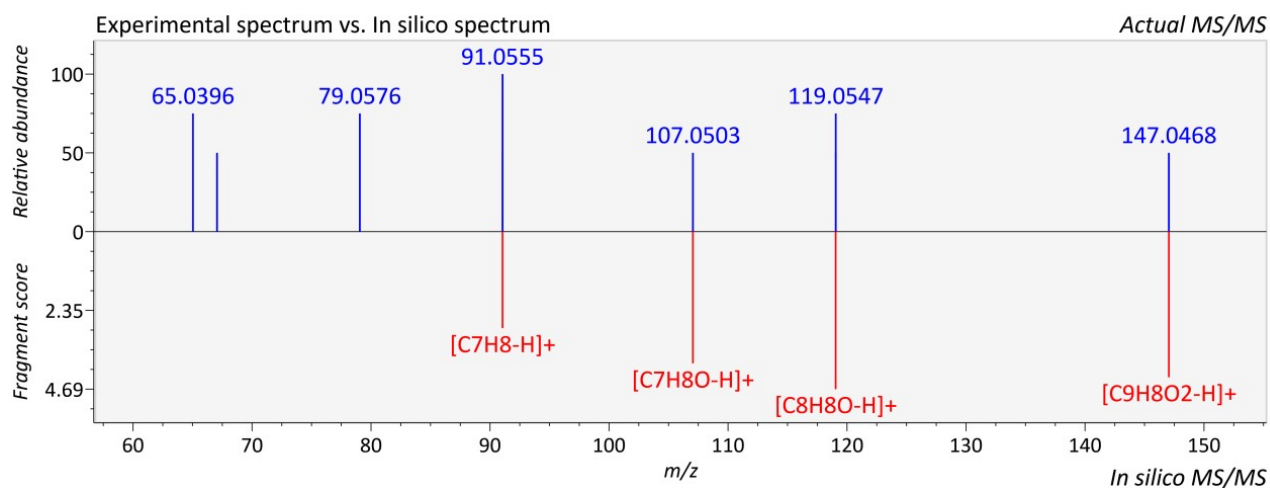

No.18 1-O-primeveroside-3,6,8-trihydroxyl-2-methyl-anthraquinone

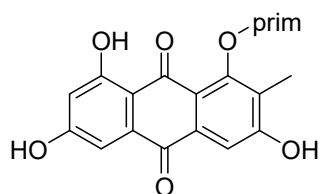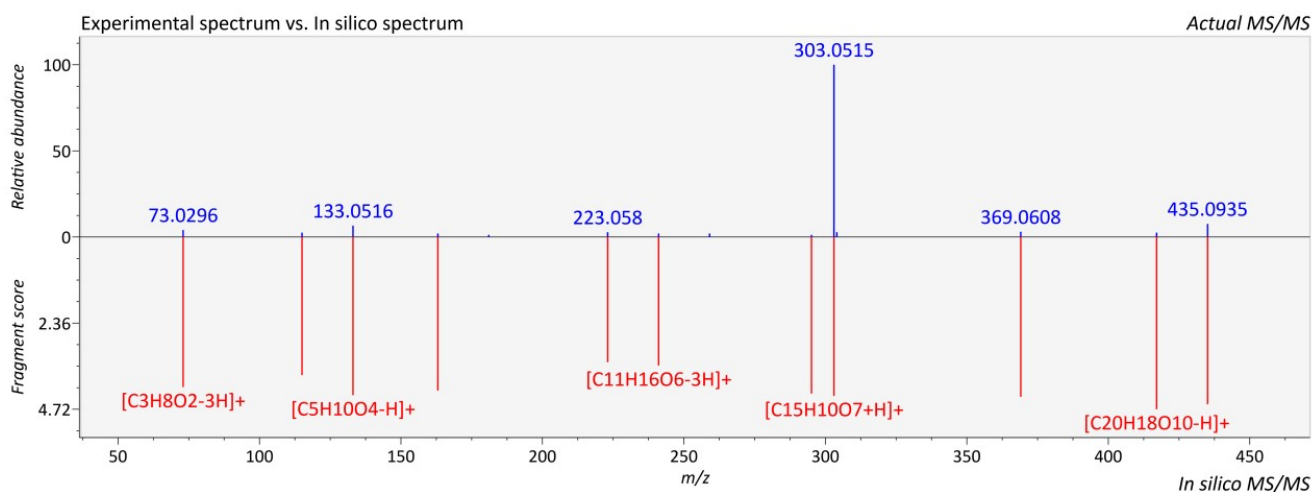

No.19 Ellagic acid

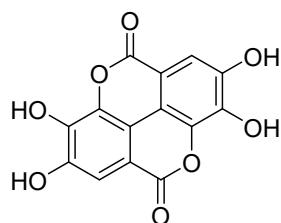

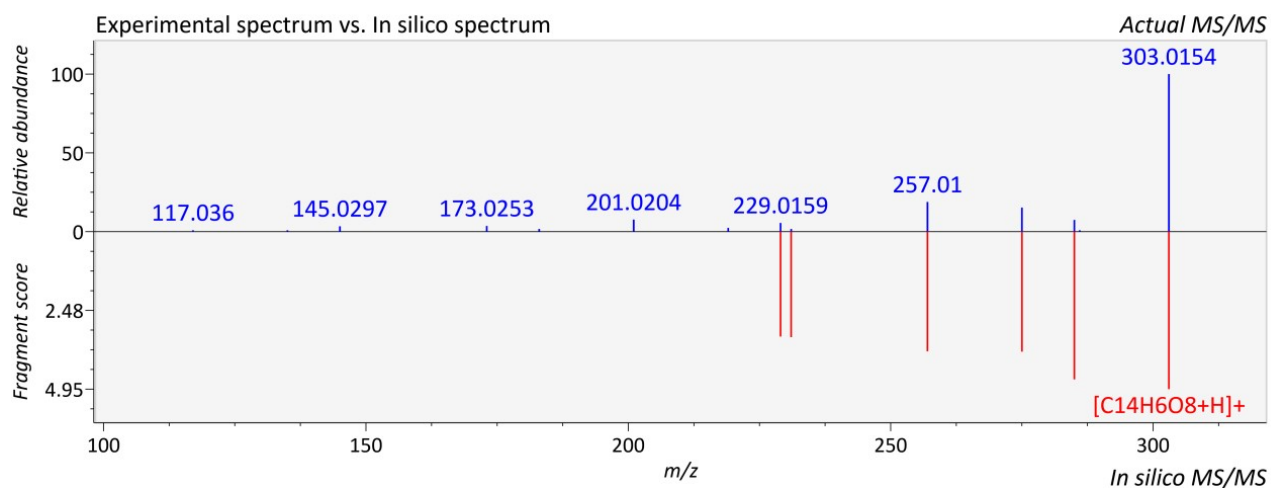

No.20 4-(1-Hydroxy-2,6,6-trimethyl-2-cyclohexen-1-yl)-3-buten-2-one

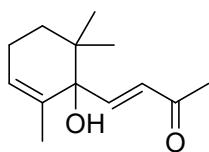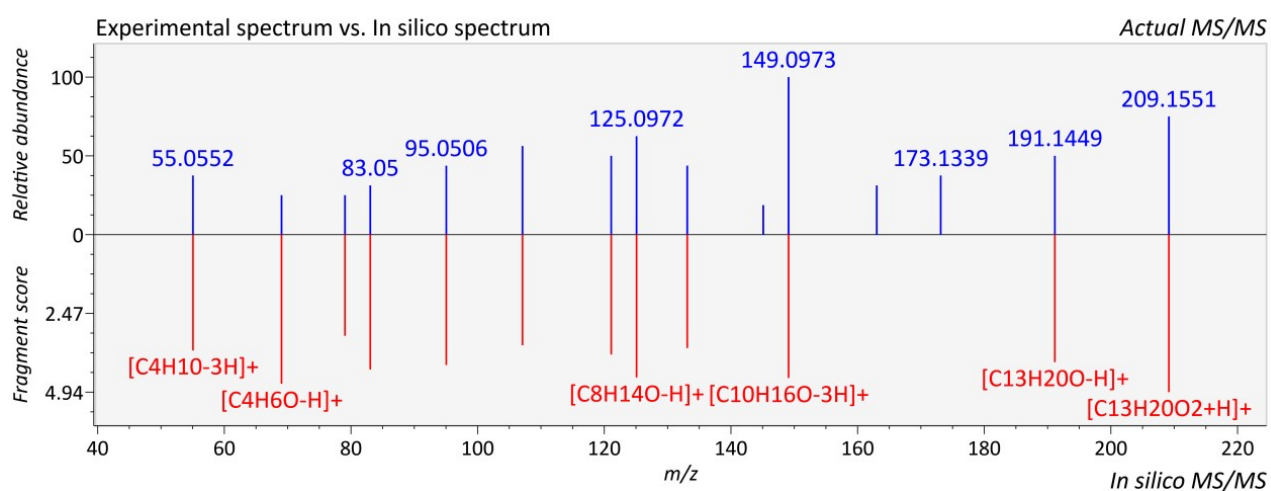

No.21 4-Oxo- $\beta$ -ionone

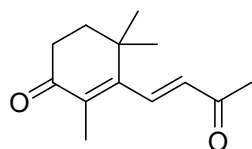

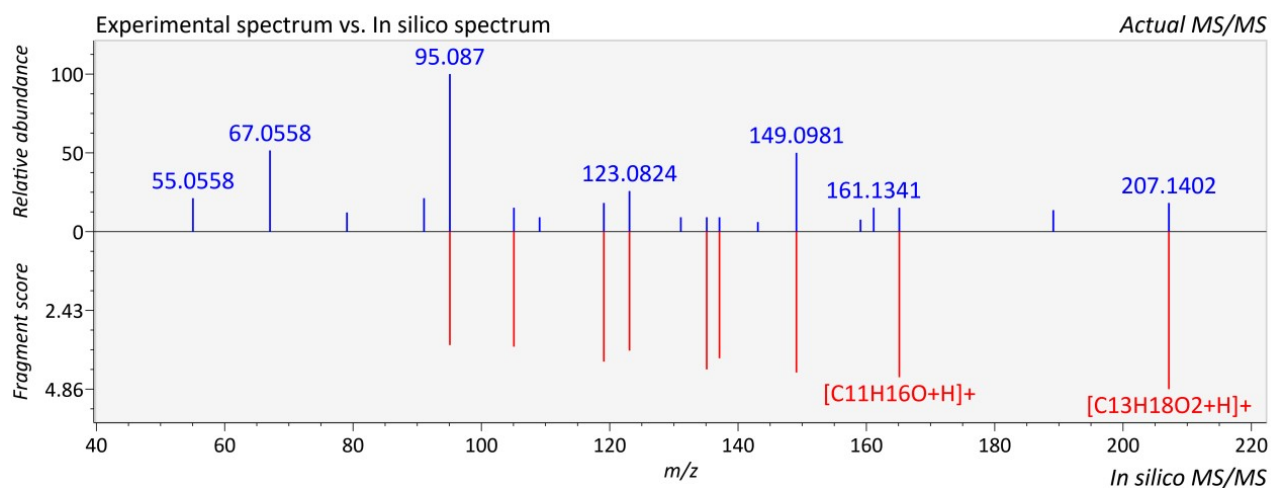

No.22 *m*-Coumaric acid

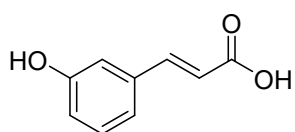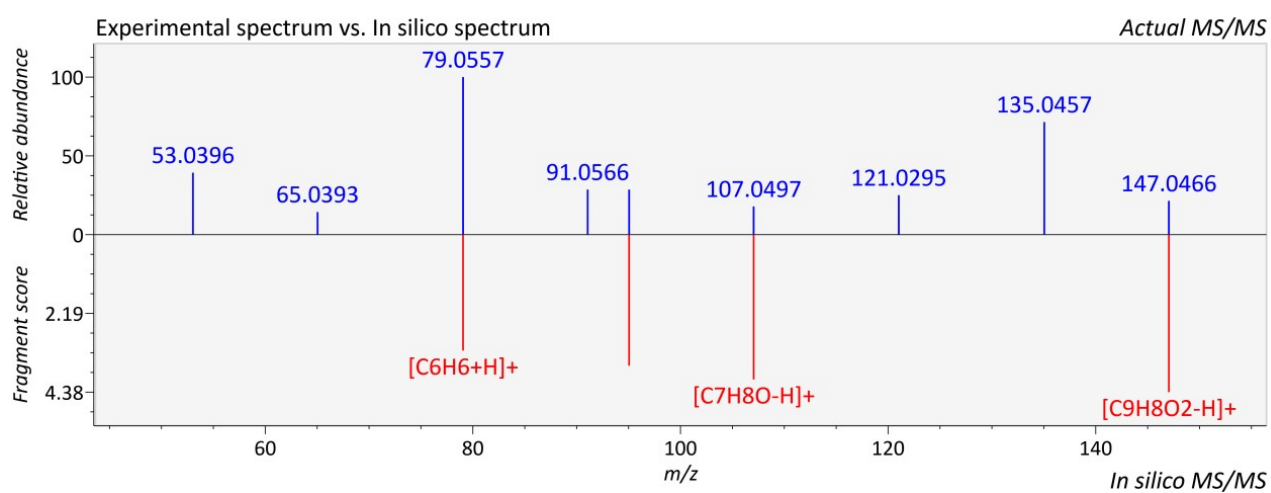

No.23 Phenacetin

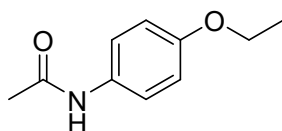

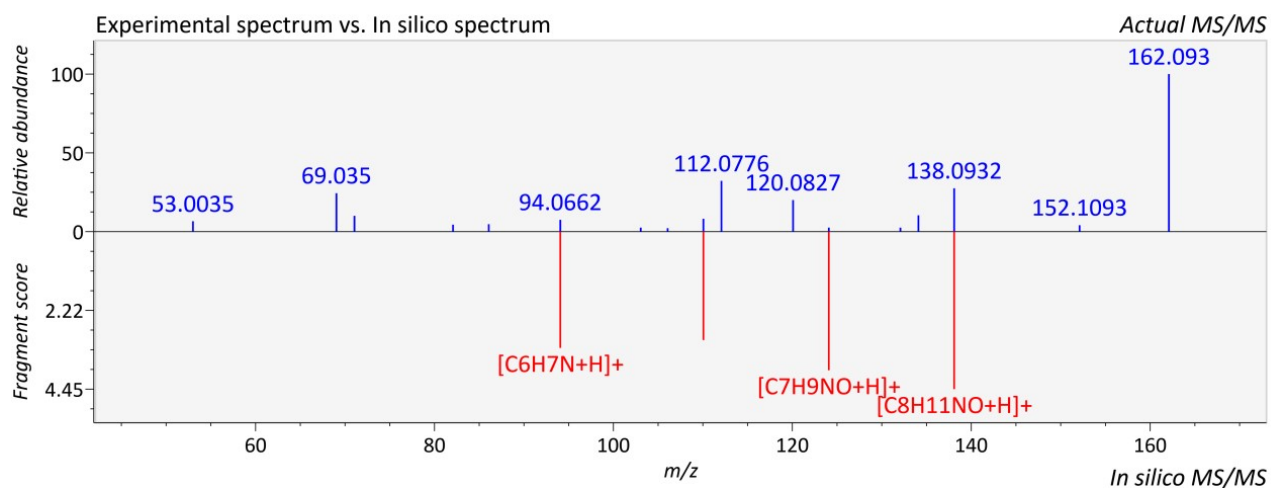

No.24 Scopoletin

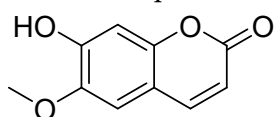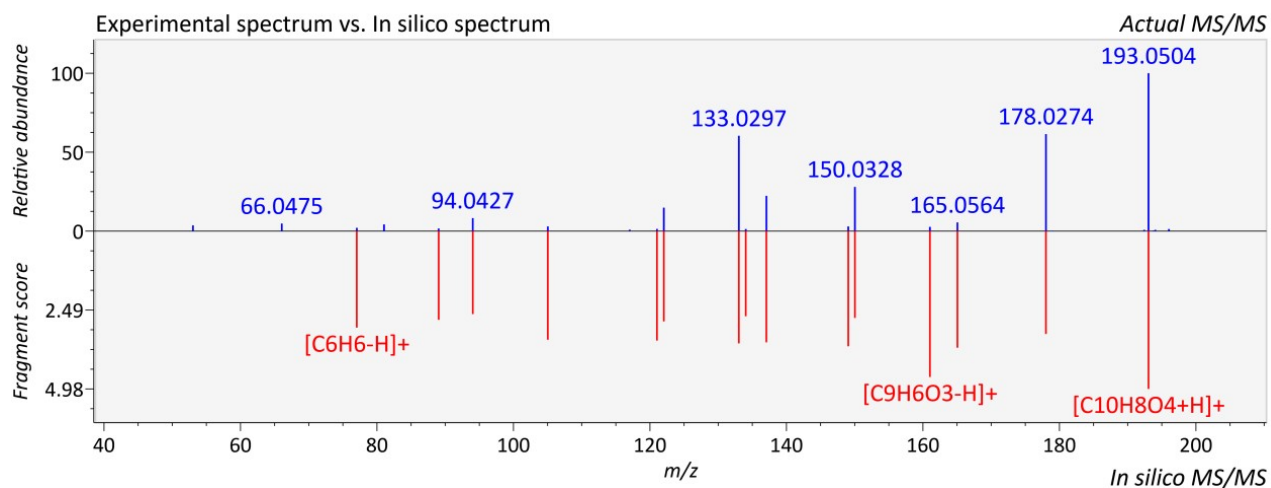

No.25 Sinapic acid

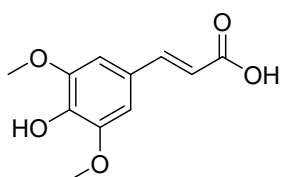

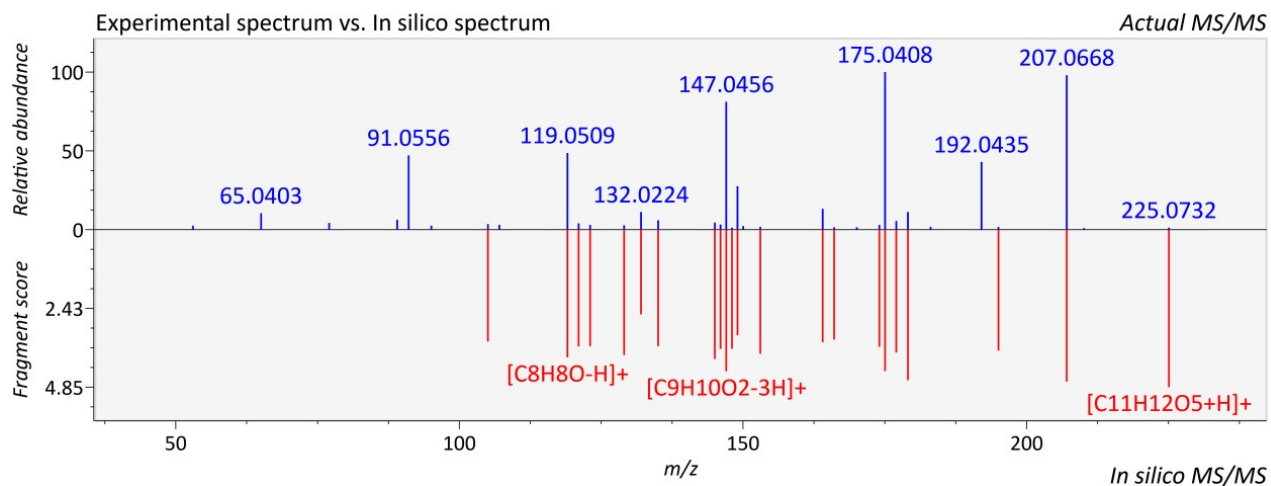

No.26 Ferulic acid

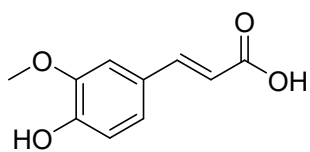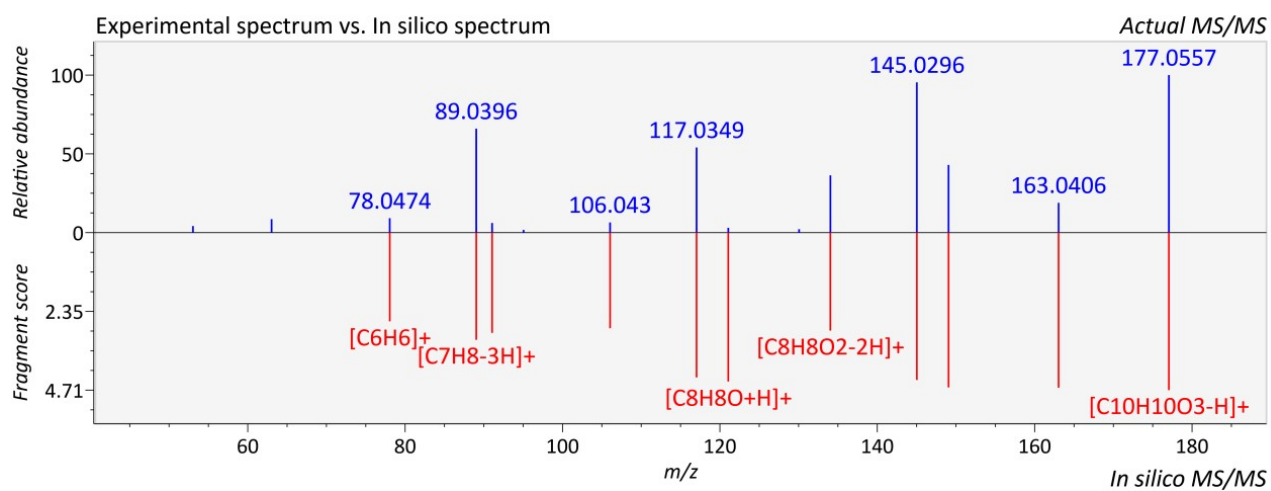

No.27 Glucoobtusifolin

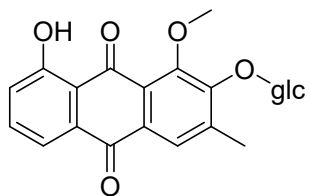

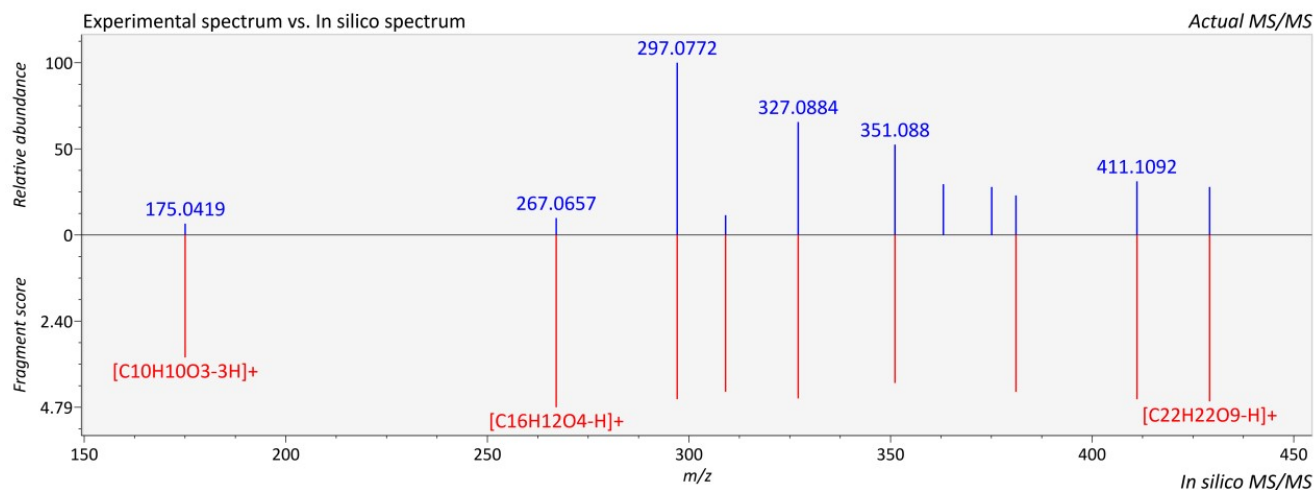

No.28 Pinoresinol

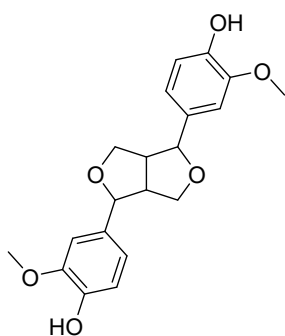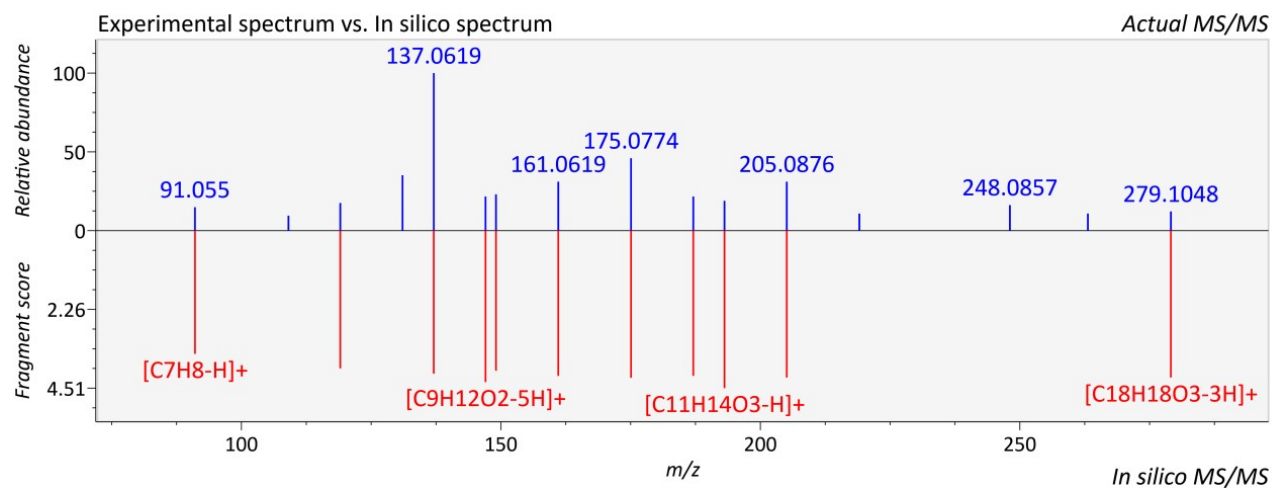

No.29 3-O-primeveroside-1,6,8-trihydroxyl-2-methyl-anthraquinone

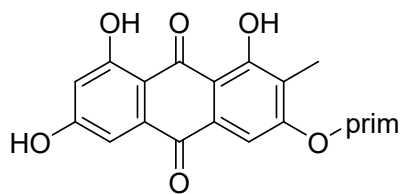

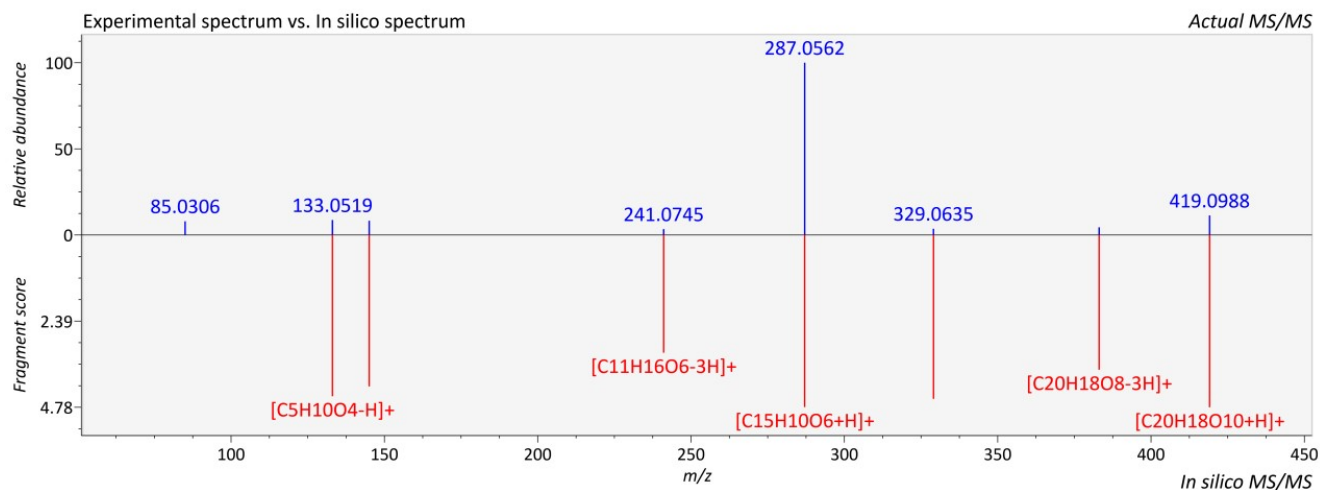

No.30 2-Formyl-1,3-dimethoxyanthraquinone

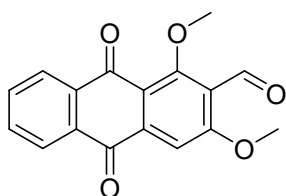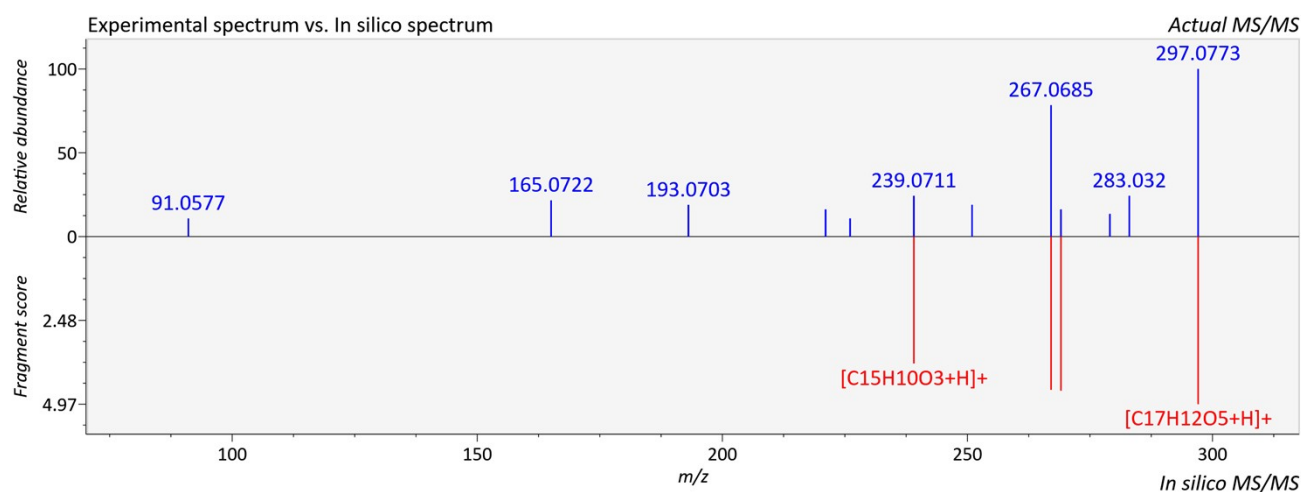

No.31 4-(1-Hydroxy-2,2-dimethyl-6-methylenecyclohexyl)-3-buten-2-one

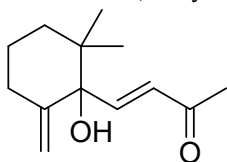

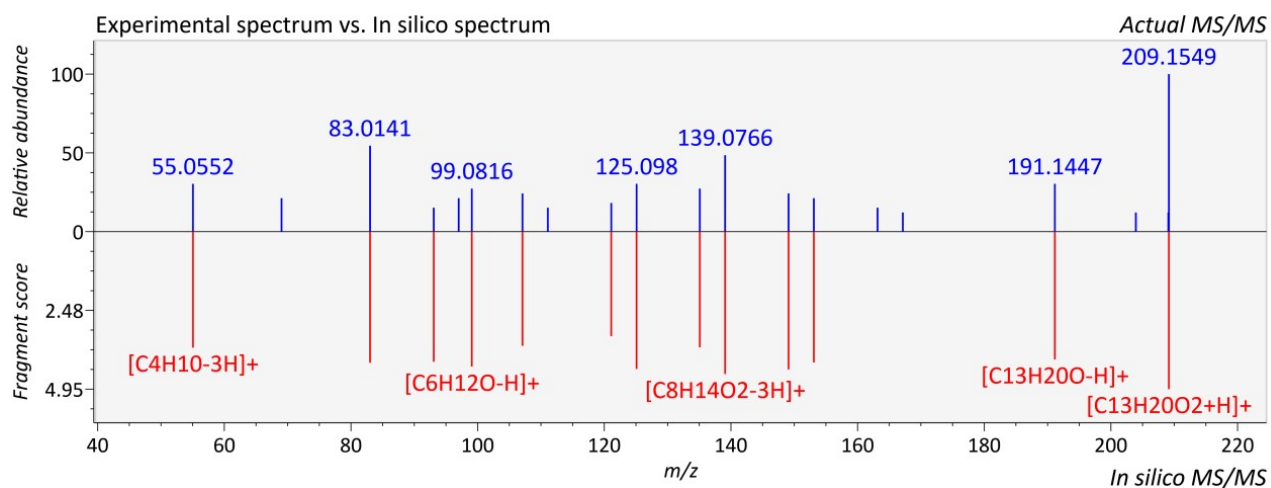

No.32 Gaertneric acid

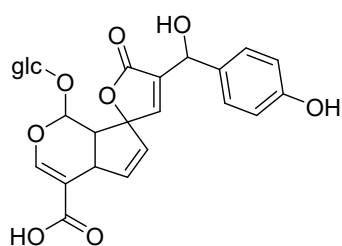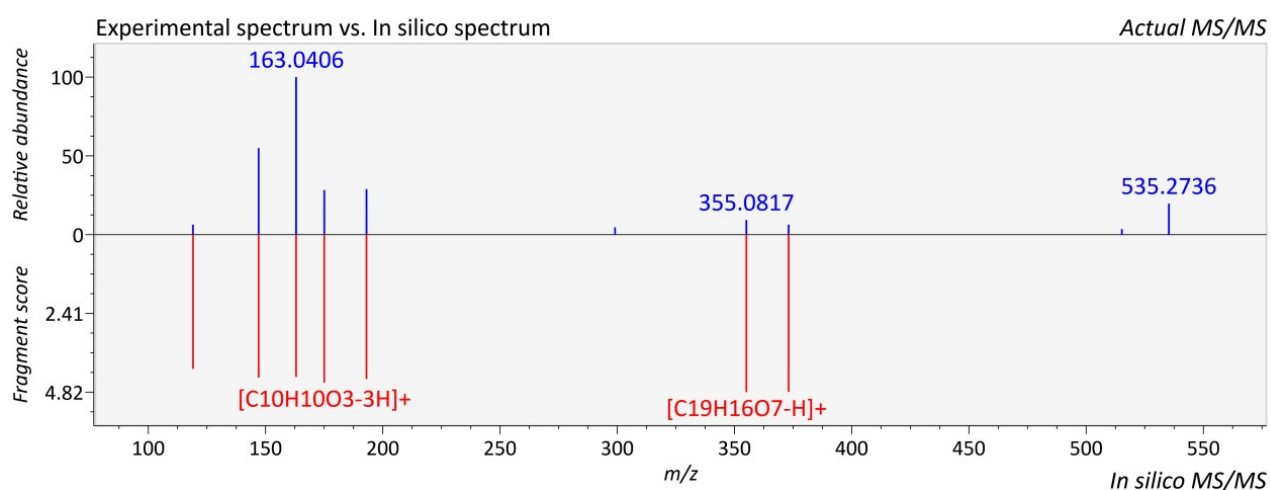

No.33 Coniferaldehyde

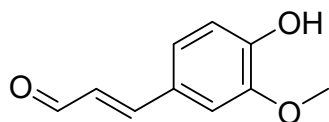

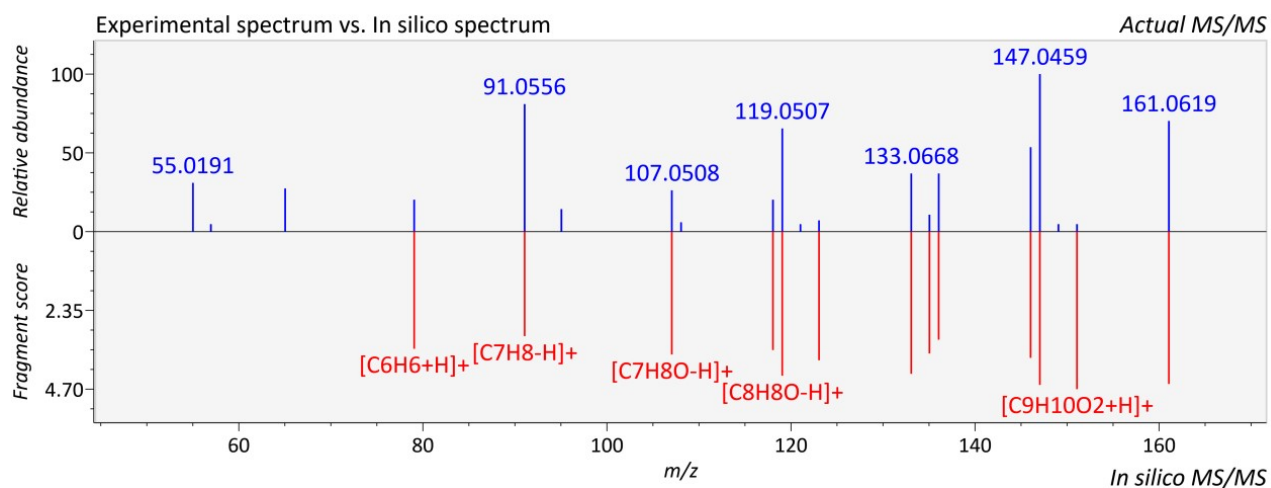

No.34 Methyl ferulate

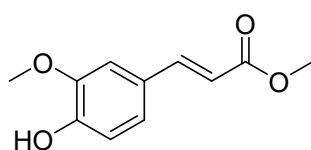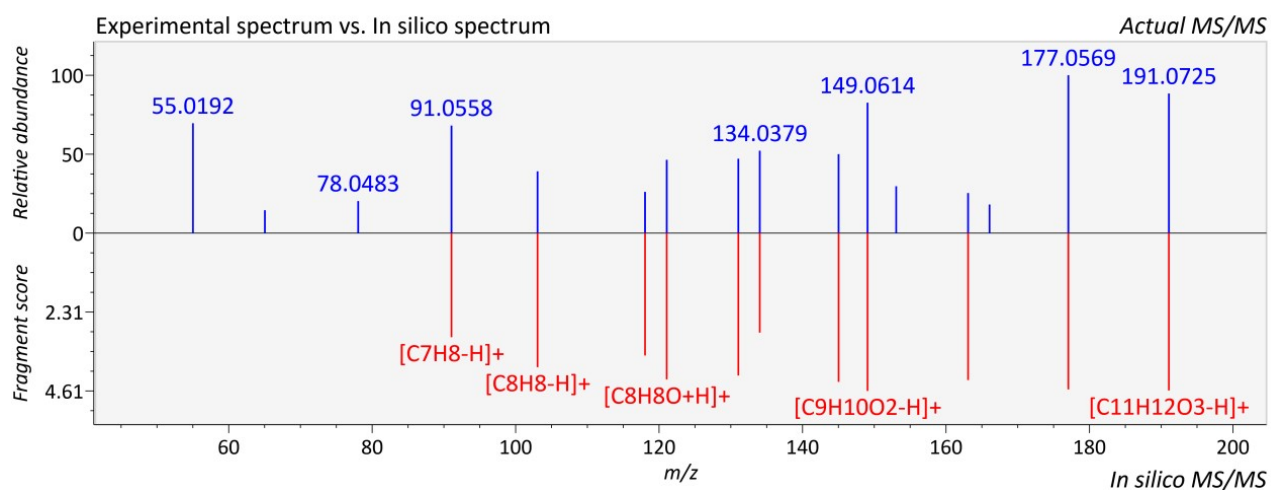

No.35 Rubiadin-3-O-glucoside

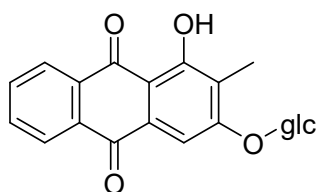

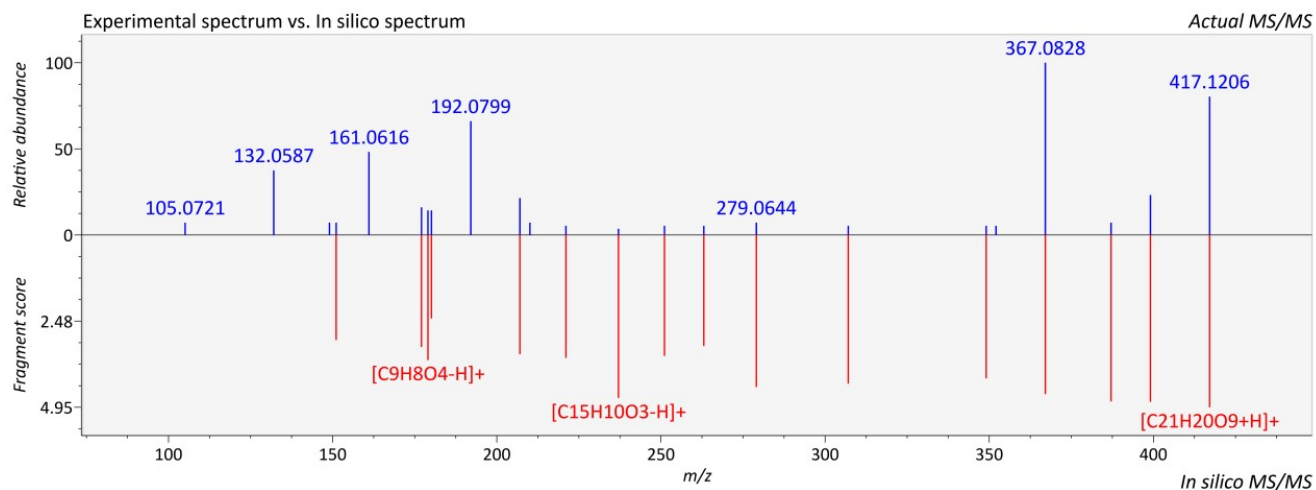

No.36 Damnacanthal

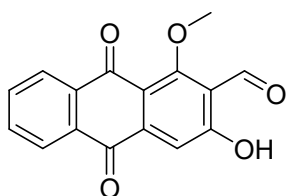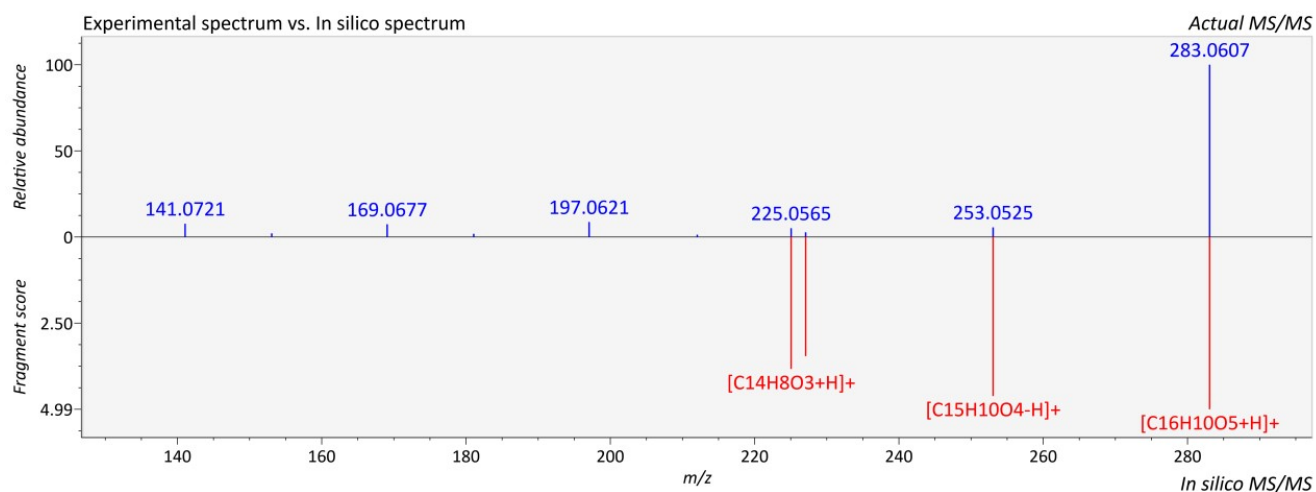

No.37 Xanthopurpurin

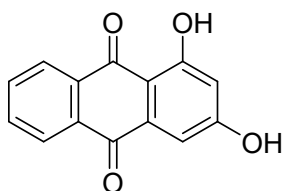

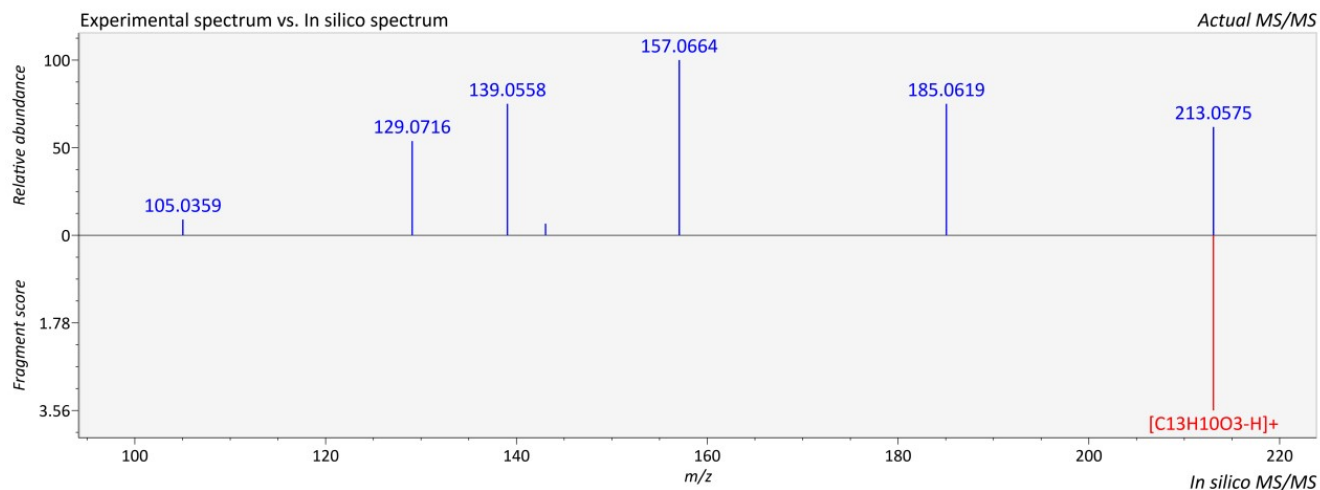

No.38 1,3-Dihydroxyl-2-methoxymethyl-anthraquinone

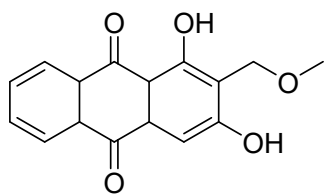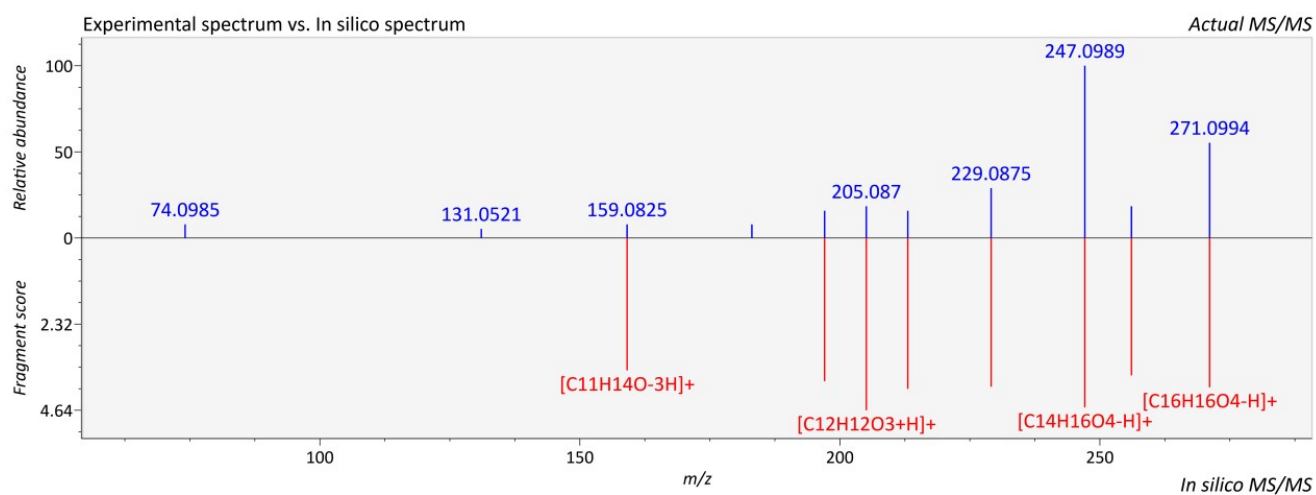

No.39 Gaertneroside

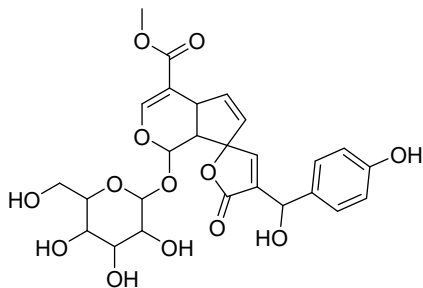

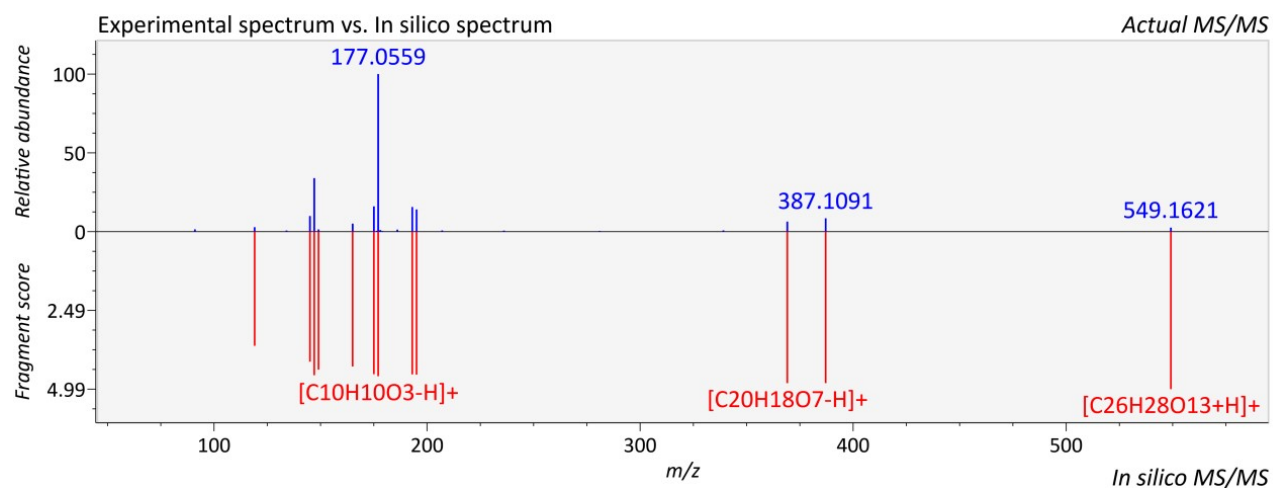

No.40 Norjuzunal

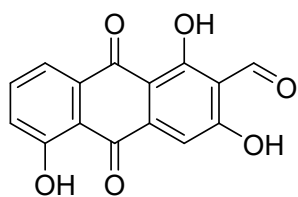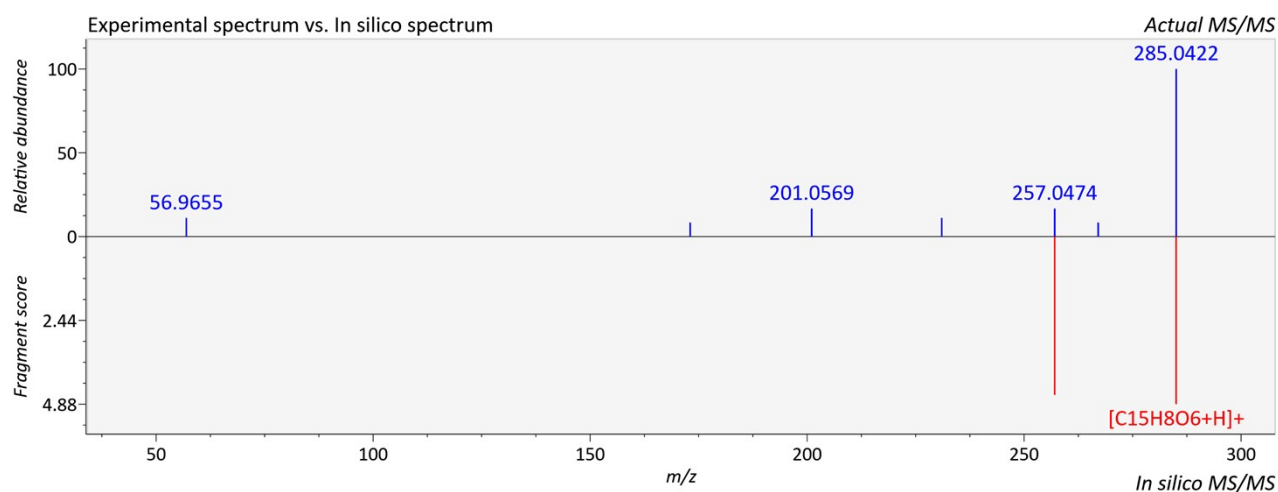

No.41 Obtusin

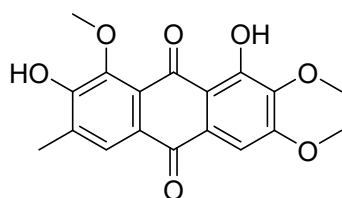

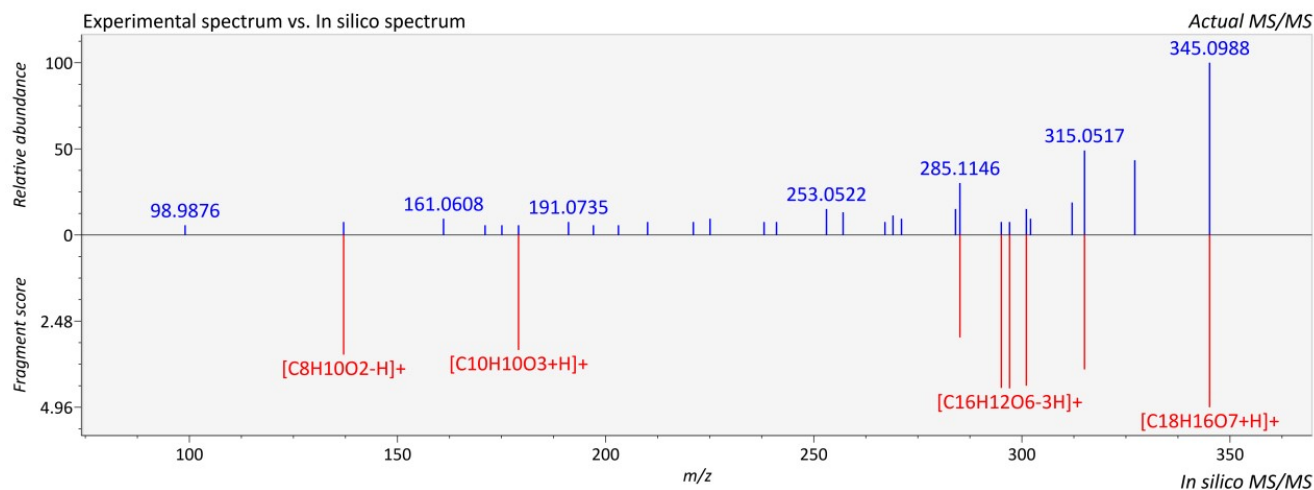

No.42 1,7-Dihydroxyl-2-hydroxymethyl-anthraquinone

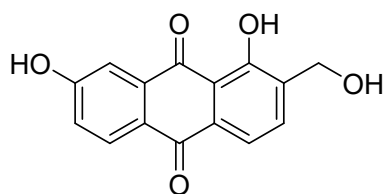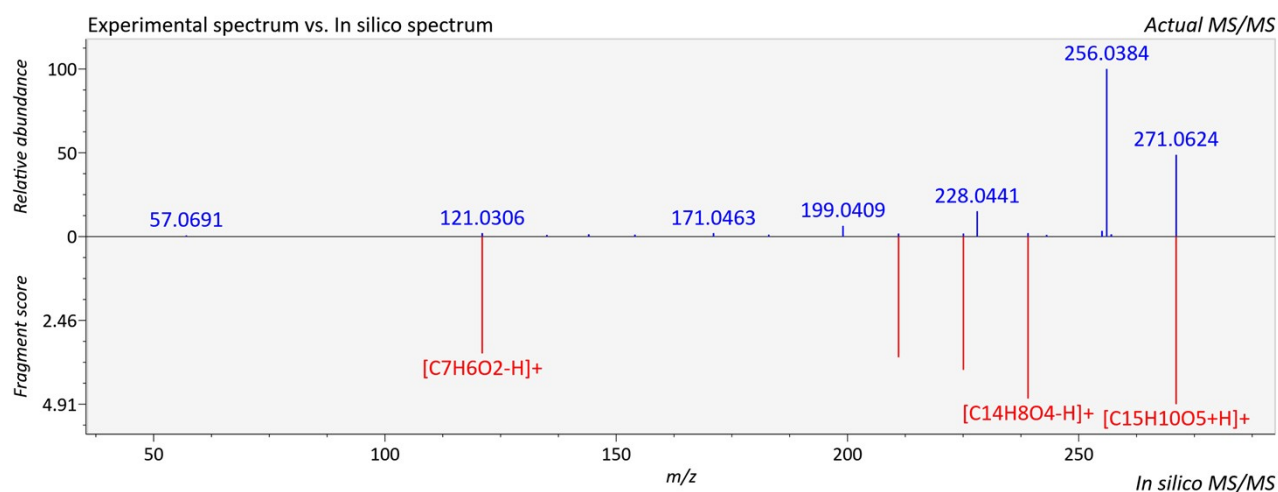

No.43 1,3-Dimethoxyl-2-hydroxymethyl-anthraquinone

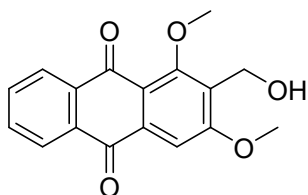

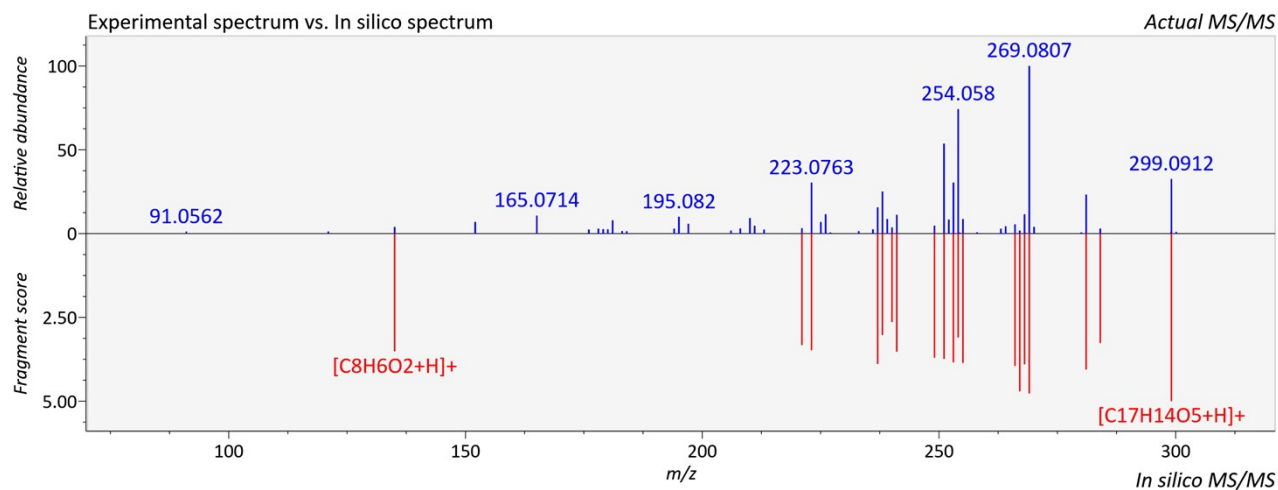

#### No.44 Physcion-8-O-rutinoside

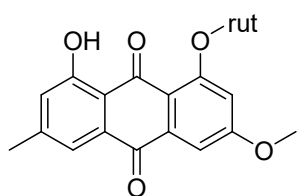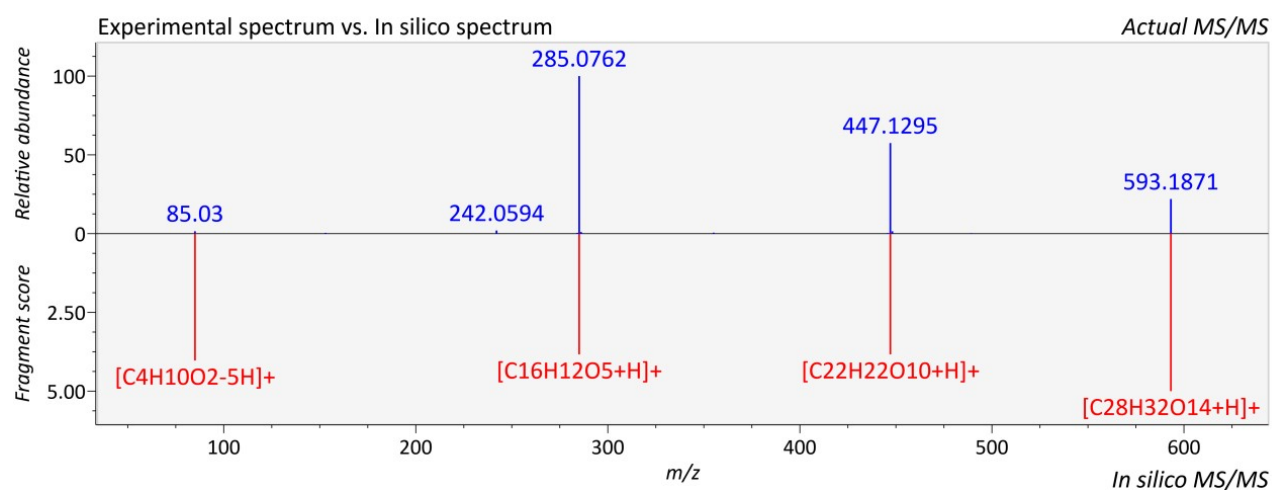

#### No.45 Franguloside

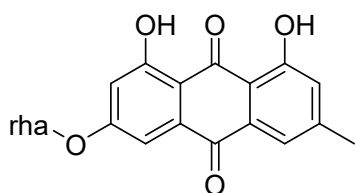

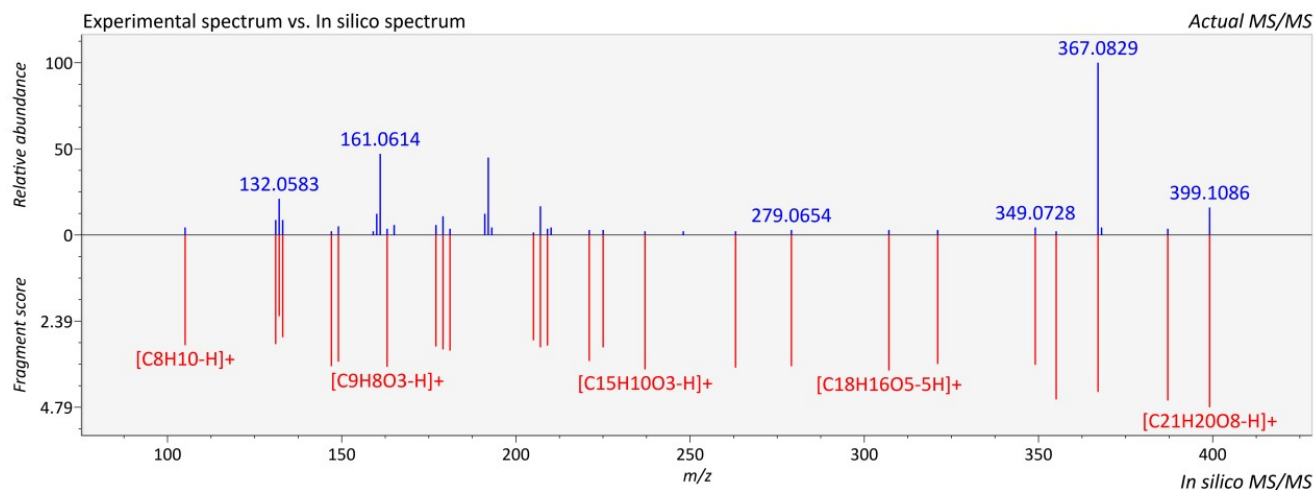

No.46 2-Hydroxyl-3-methoxyl-7-hydroxymethyl-anthraquinone

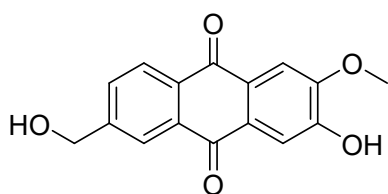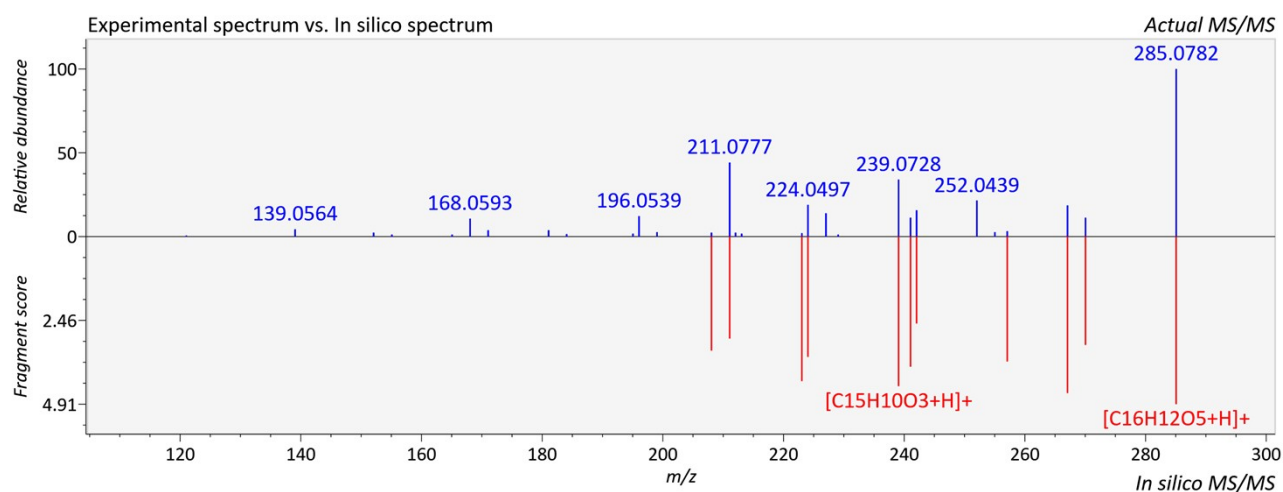

No.47 3,6-Dihydroxyl-1-methoxyl-2-hydroxymethyl-anthraquinone

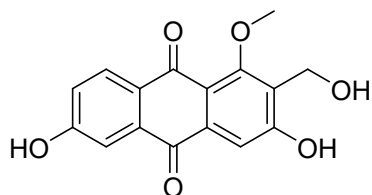

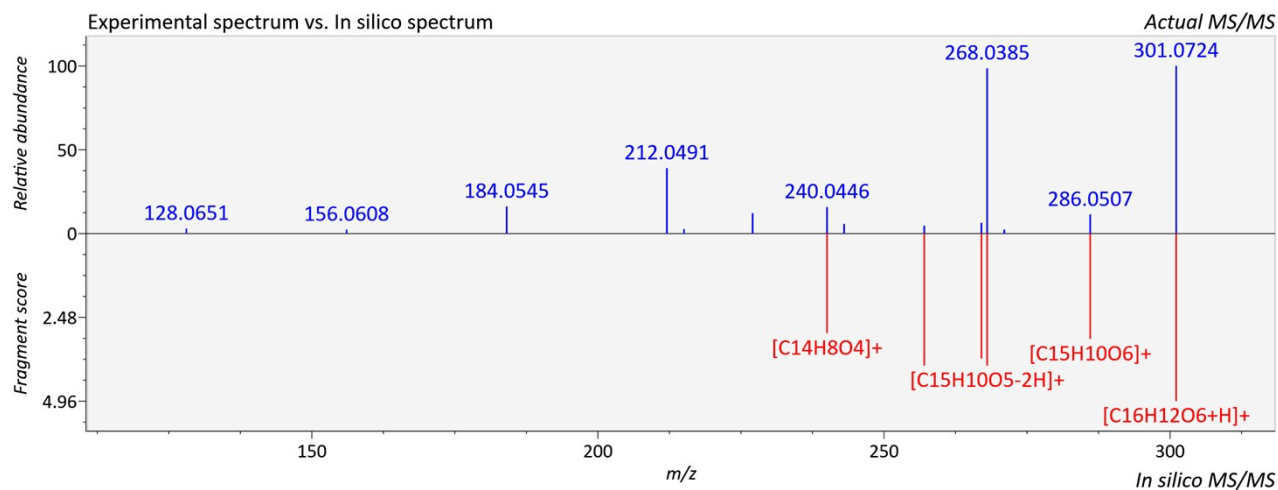

No.48 2,3-Dihydroxyl-1-methoxyl-anthraquinone

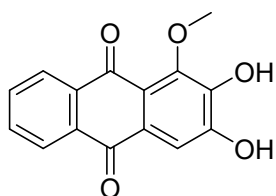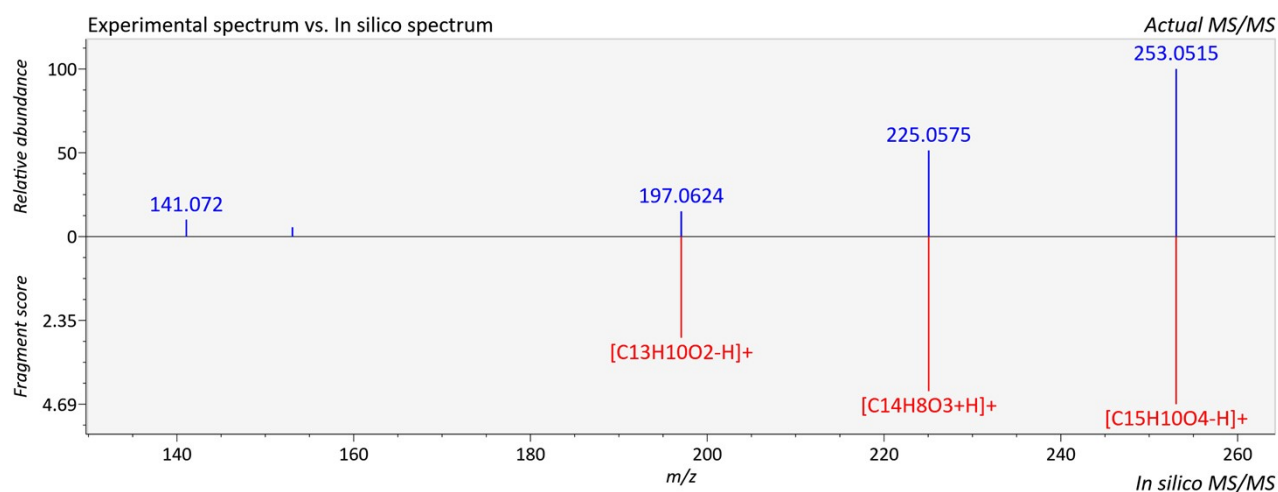

No.49 Balanophonin

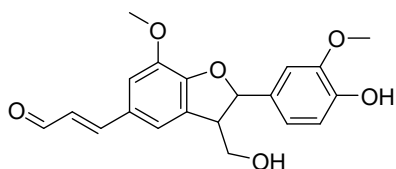

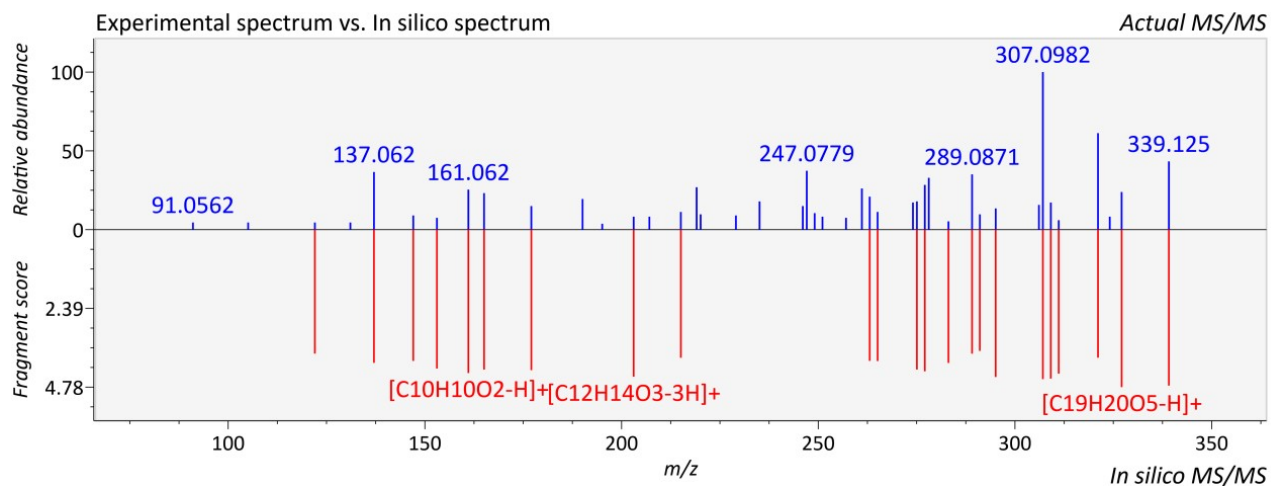

No.50 Madagascin

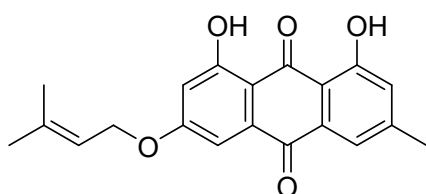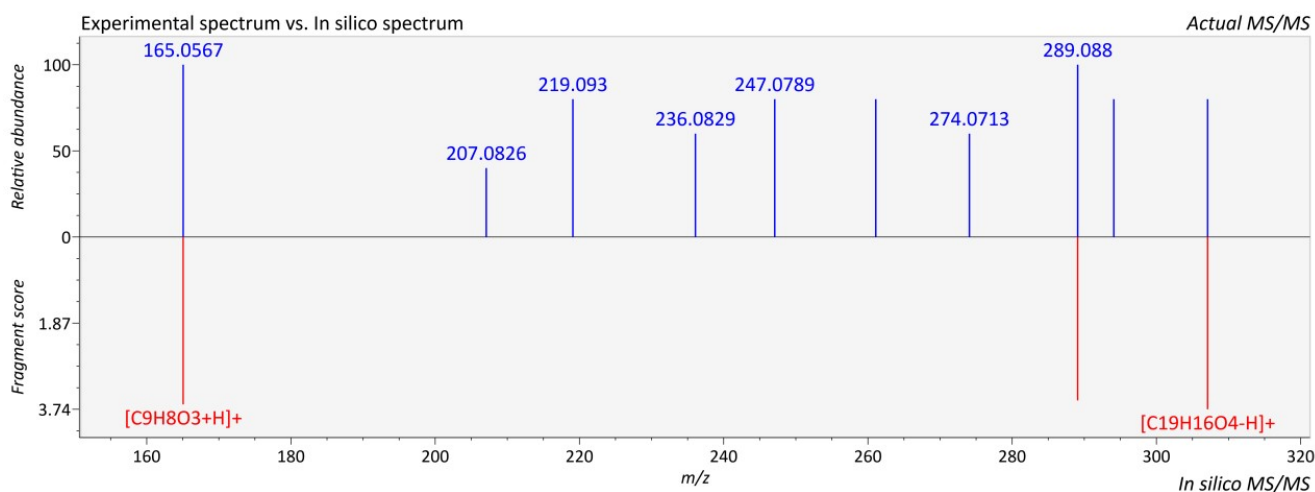

No.51 Ophiohayatone A

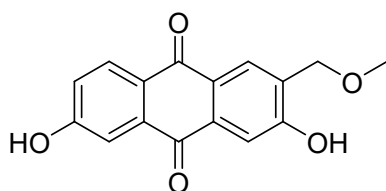

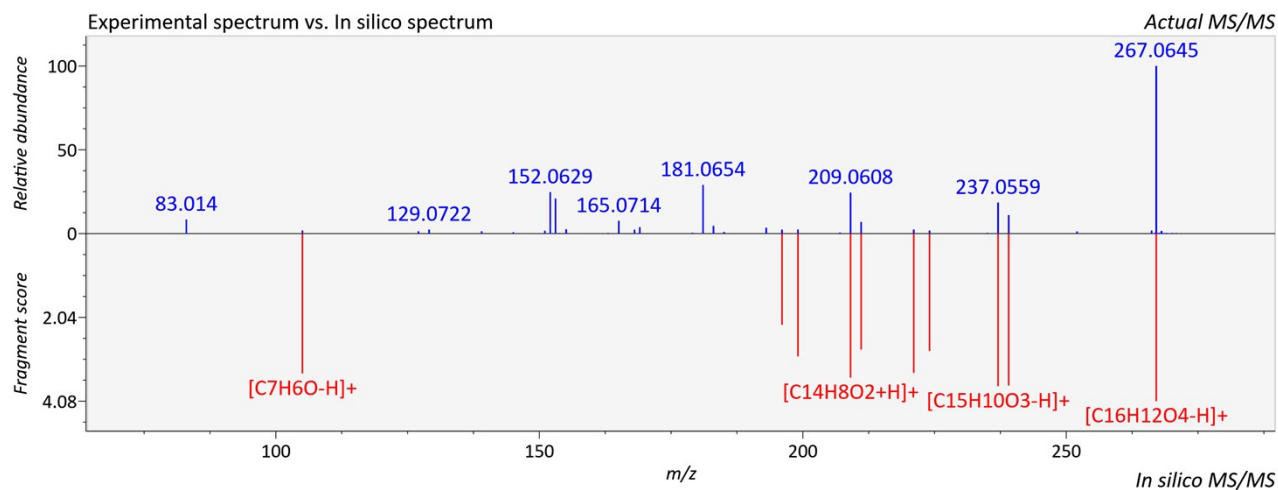

No.52 2,5-Dihydroxy-1-methoxy-9,10-anthracenedione

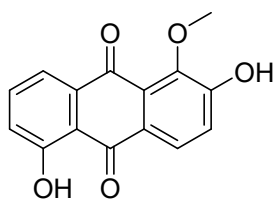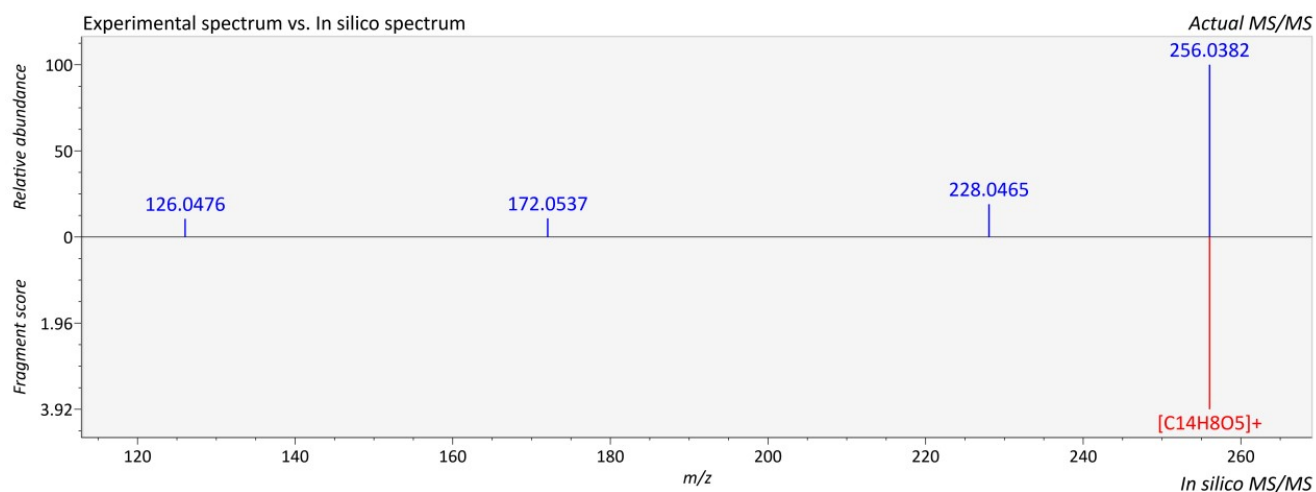

No.53 1,2,8-Trihydroxyl-3-methyl-6-hydroxymethyl-anthraquinone

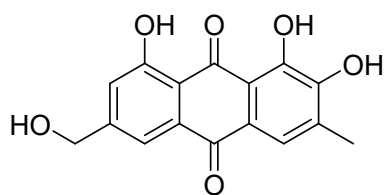

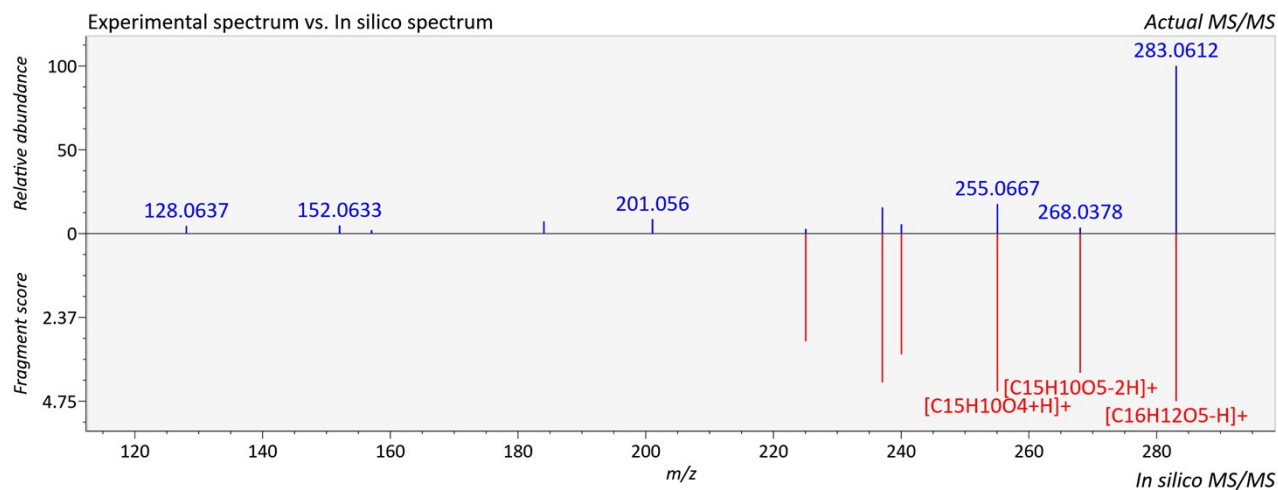

No.54 Isorhodoptilometrin

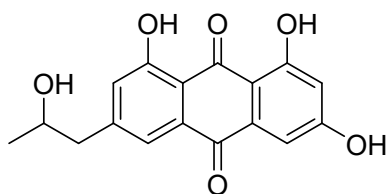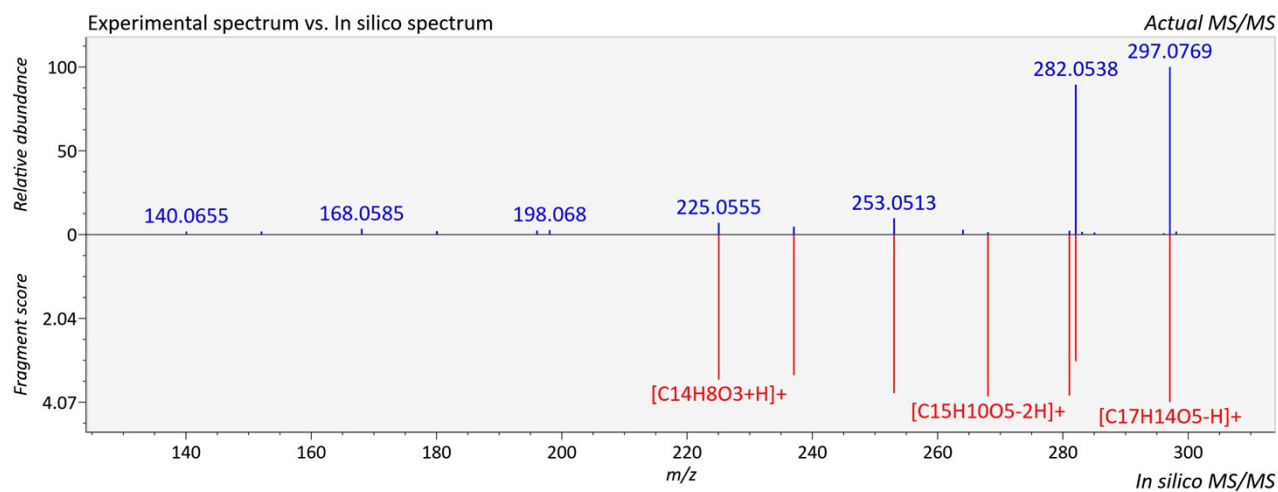

No.55 1,6-Dihydroxy-2-methoxy-9,10-anthracenedione

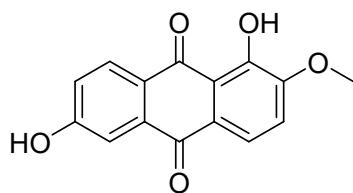

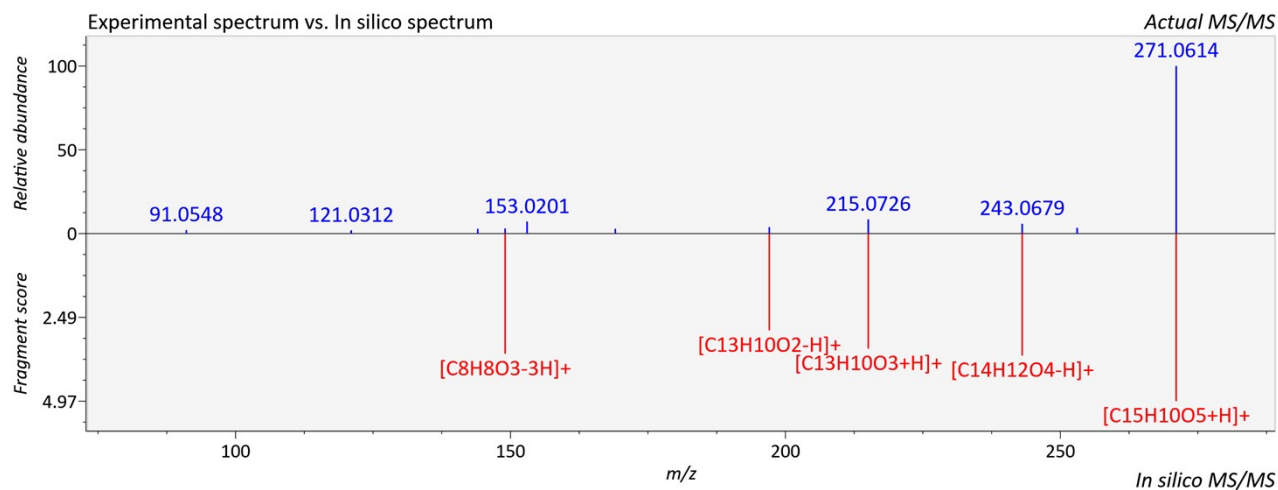

No.56 Lupinacidin-A

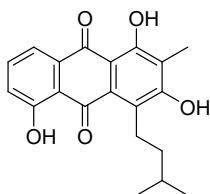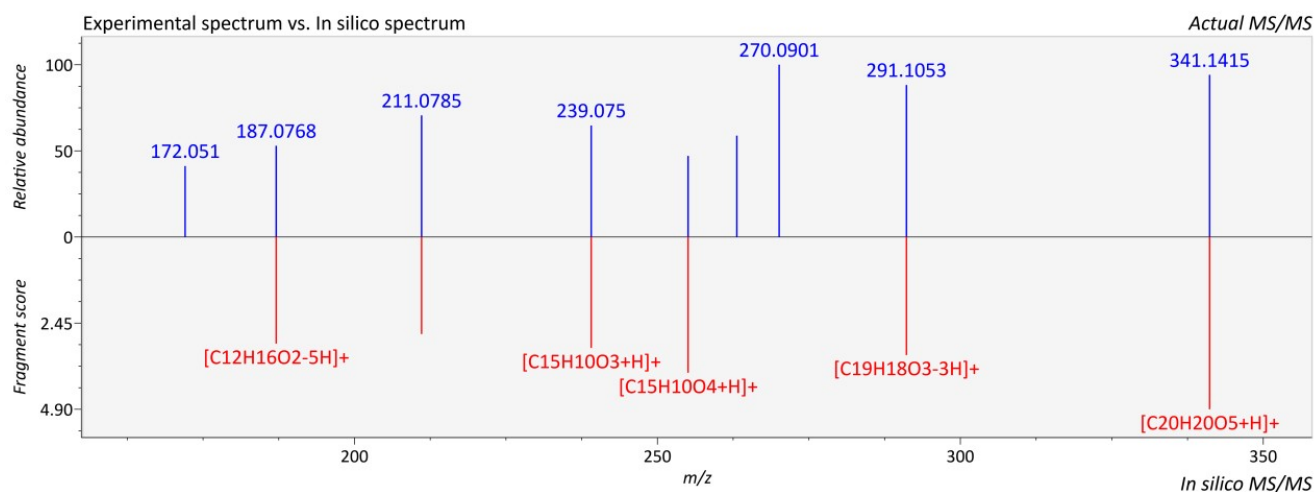

No.57 2-Hydroxyl-1,3-dimethoxyl-anthraquinone

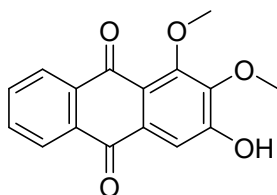

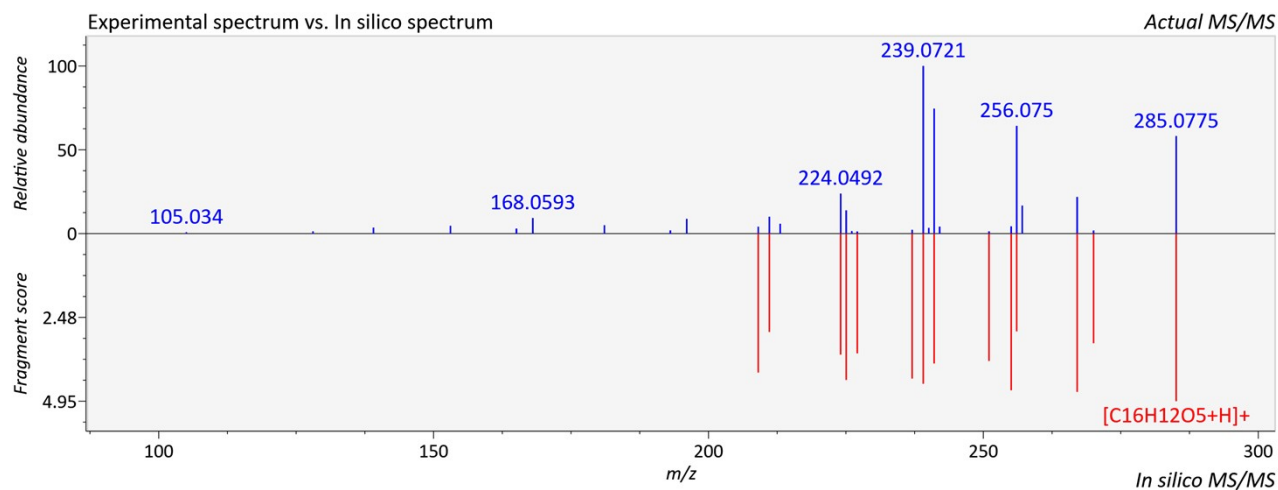

No.58 Digiferruginol

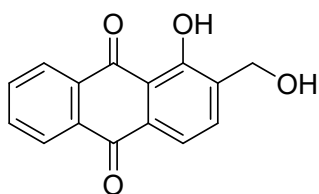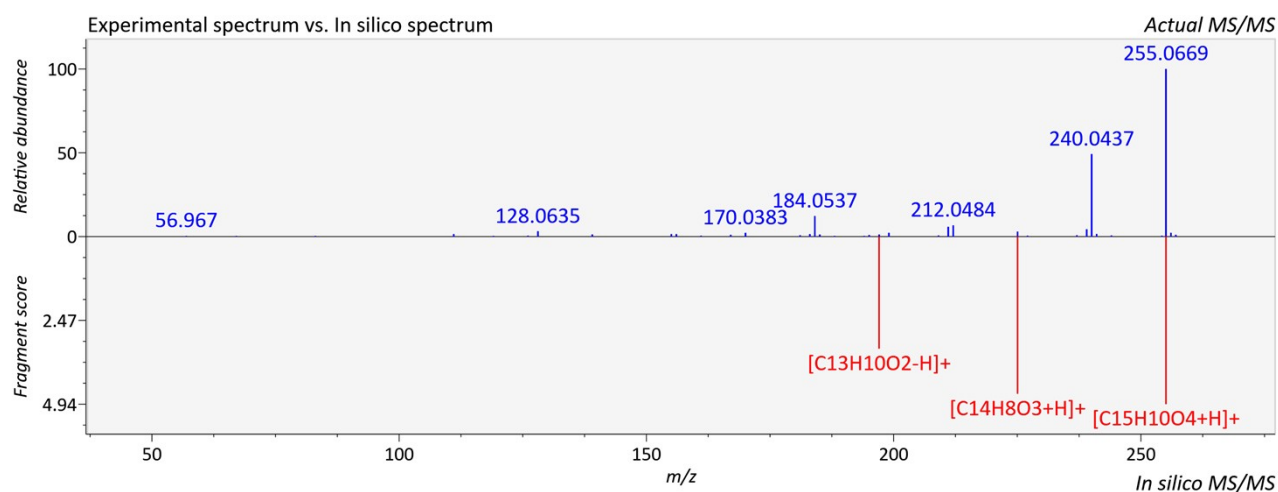

No.59 Kaempferol

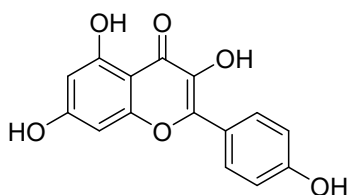

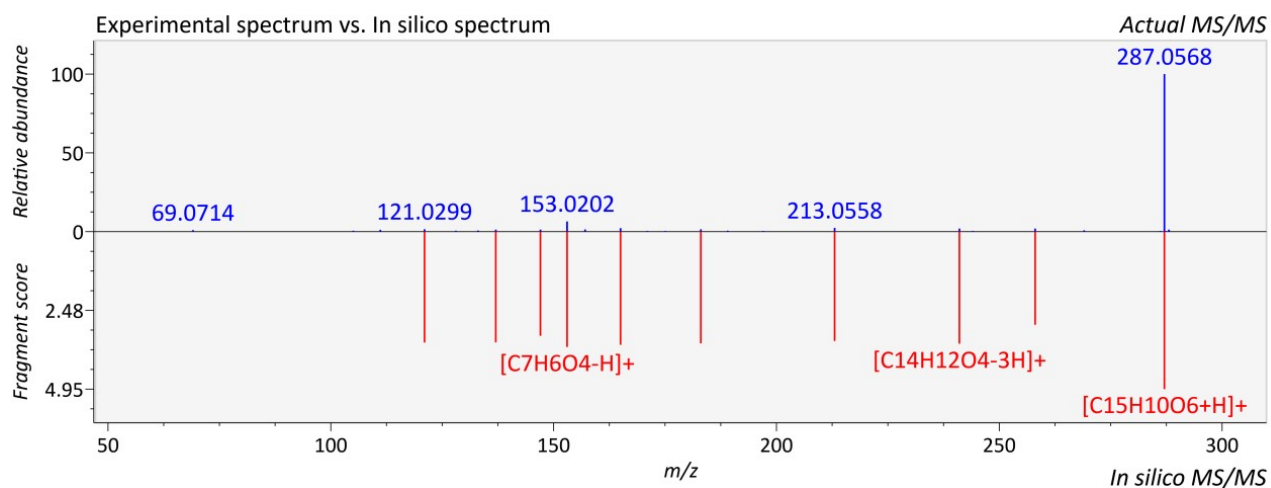

No.60 1-Hydroxyl-8-carboxy-anthraquinone

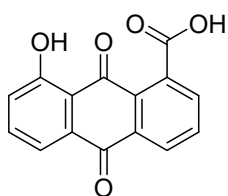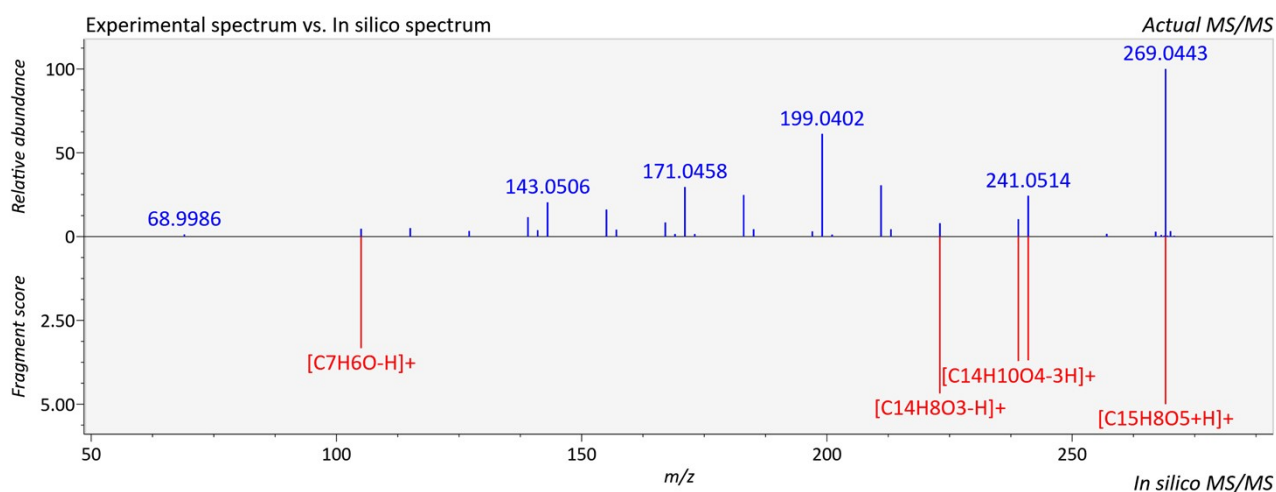

No.61 1,6-Dihydroxyl-2,5-dimethoxyl-anthraquinone

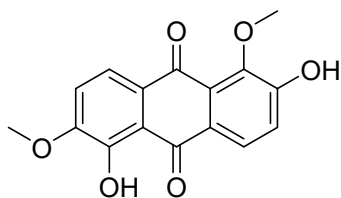

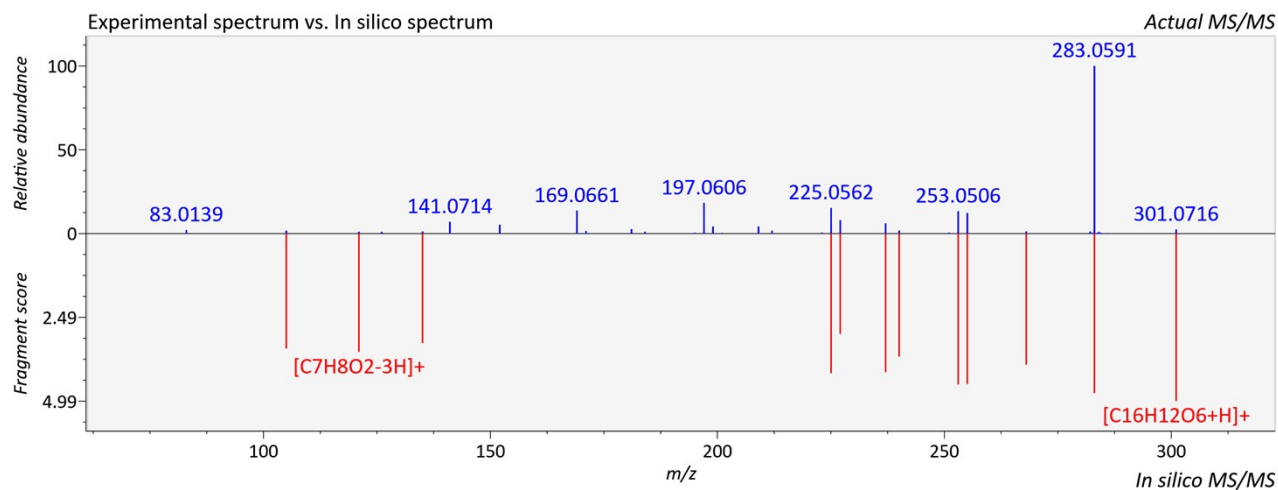

No.62 Anthragallol

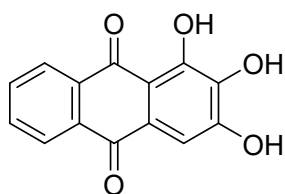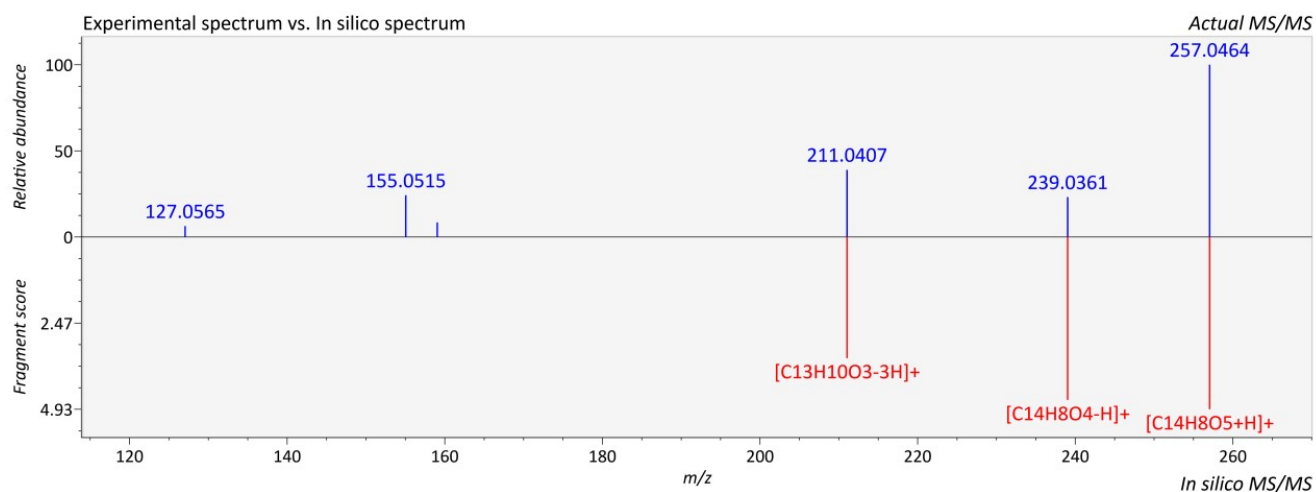

No.63 Endocrocin

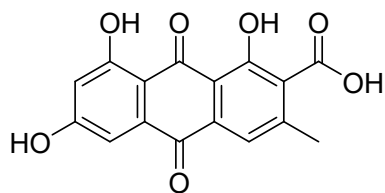

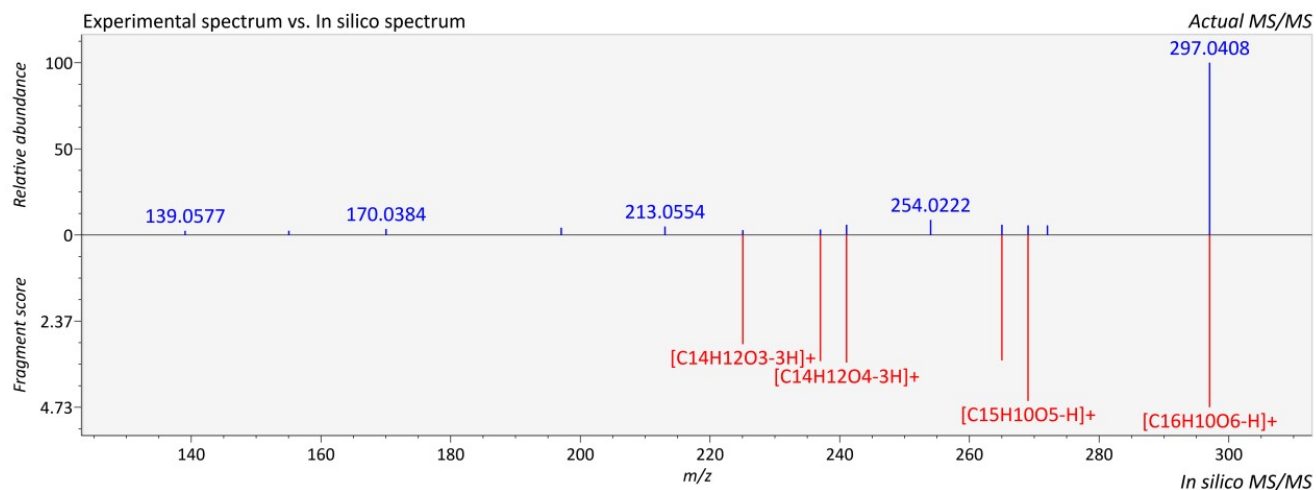

No.64 3-Hydroxyl-1-methyl-2-carbomethoxy-anthraquinone

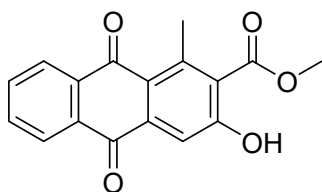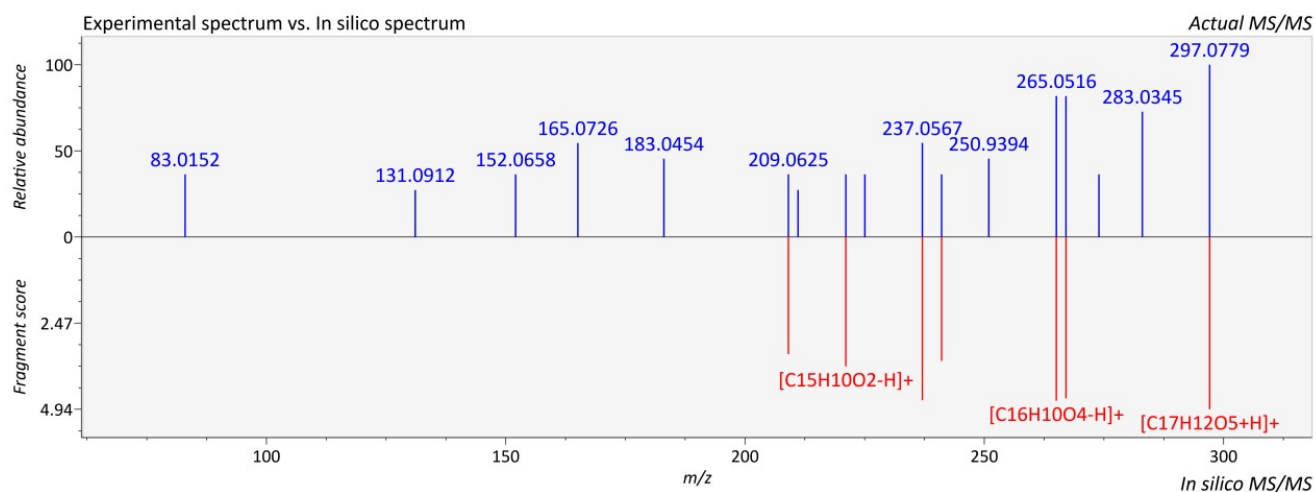

No.65 4-Methoxycinnamic acid

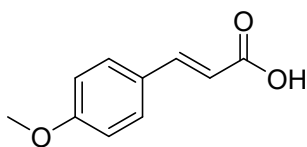

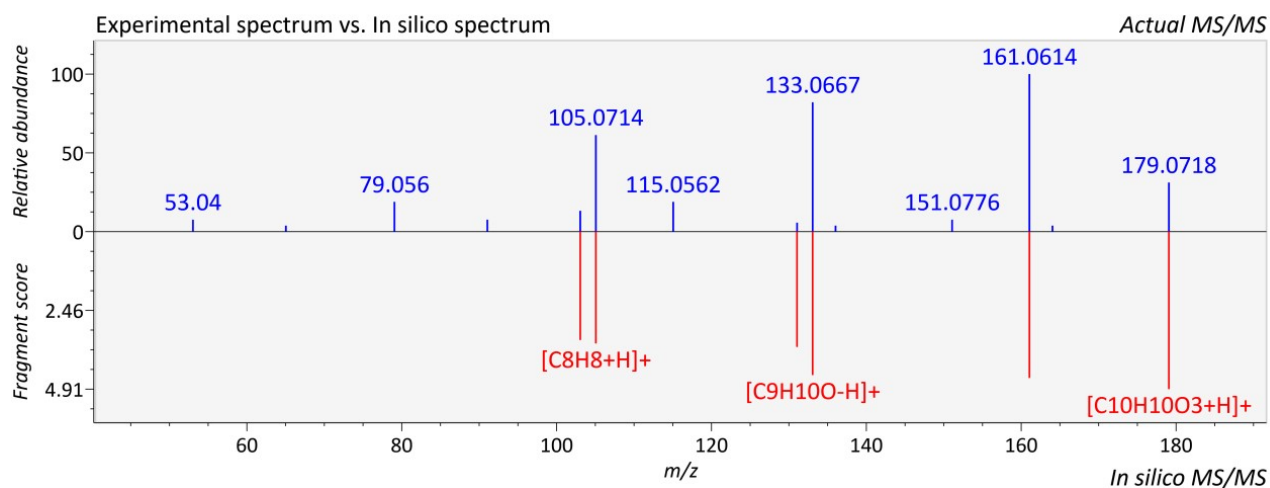

No.66 Aloe-emodin-2-hydroxyl

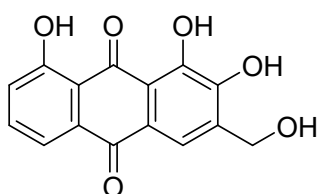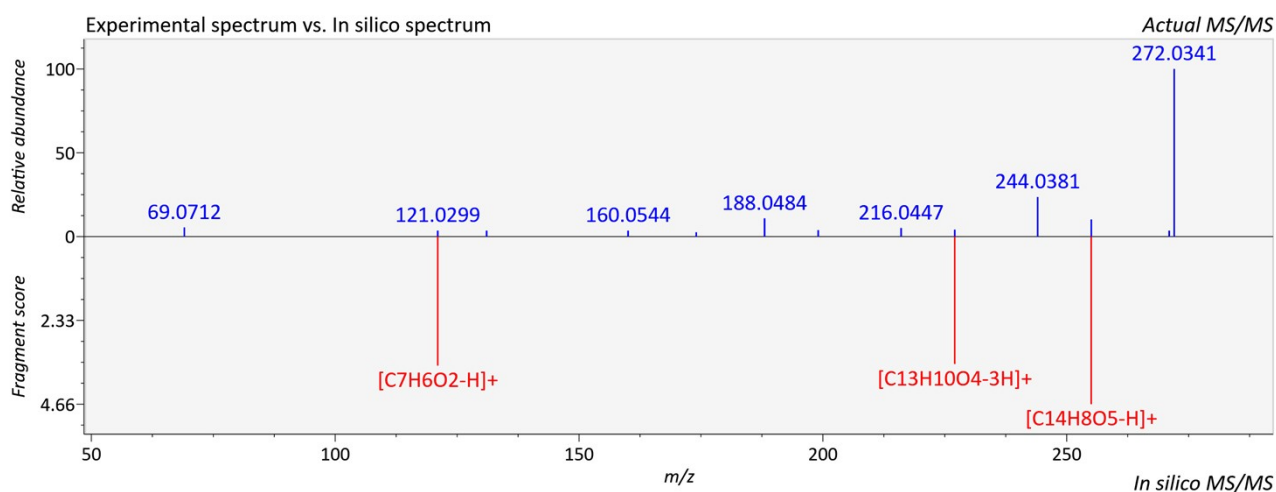

No.67 2-Hydroxymethyl-anthraquinone

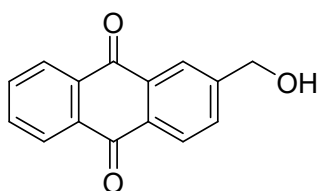

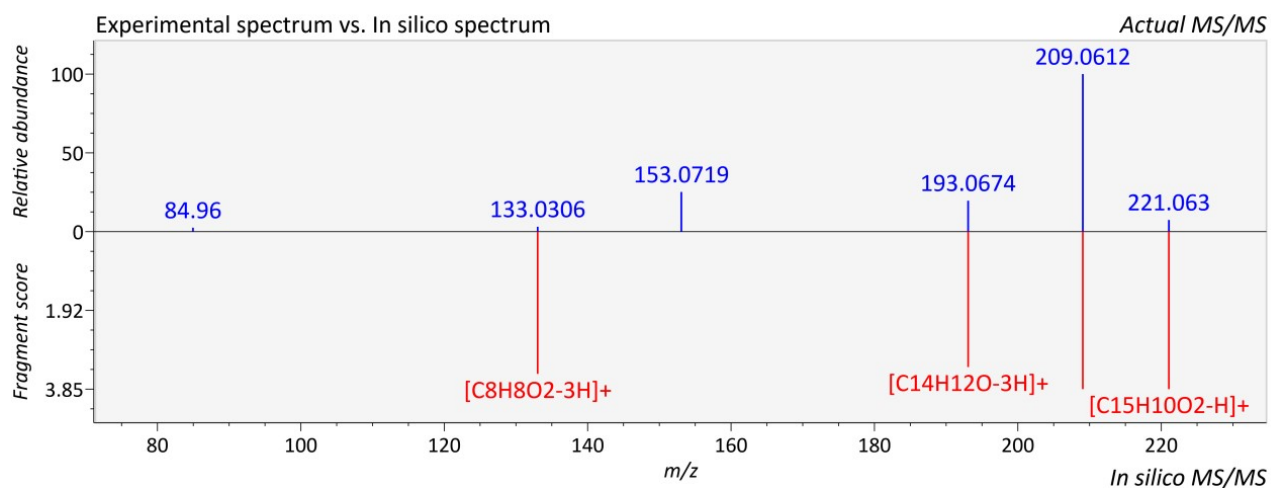

No.68 3-Hydroxyl-1,2-dimethoxyl-anthraquinone

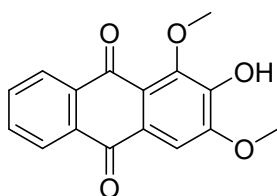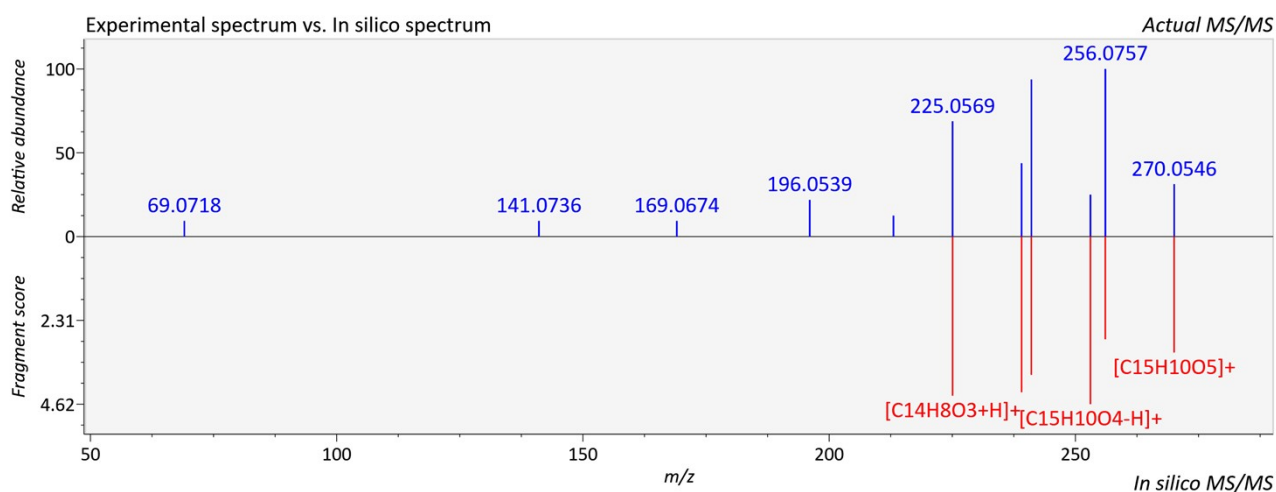

No.69 Emodin-6-geranyl

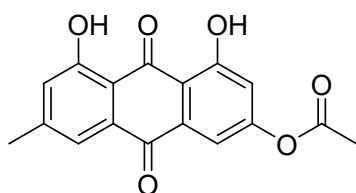

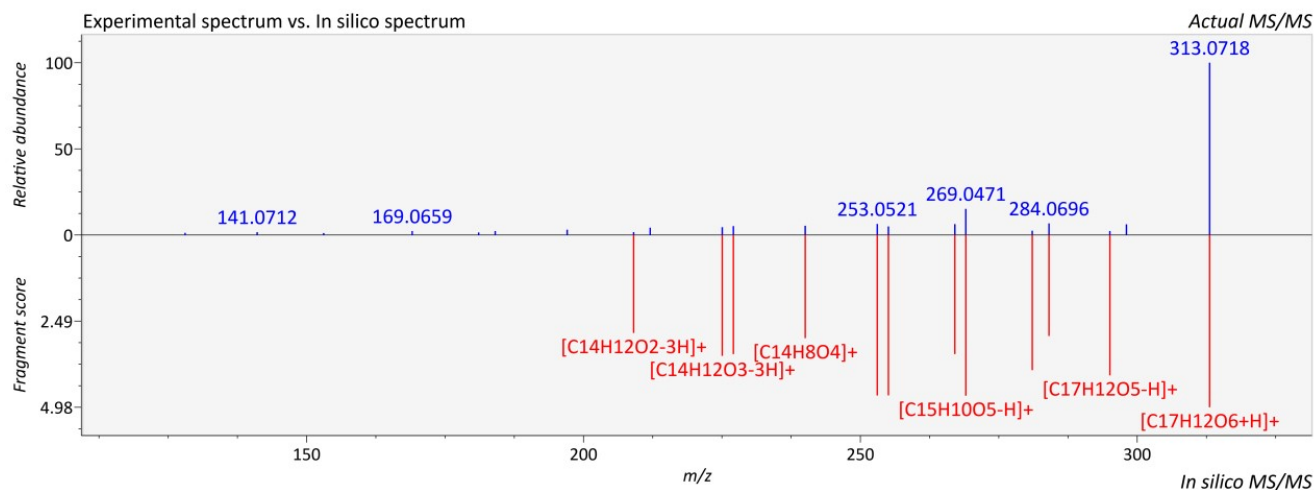

No.70 Physcion-2-acetyl

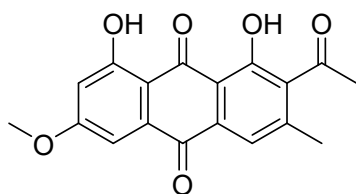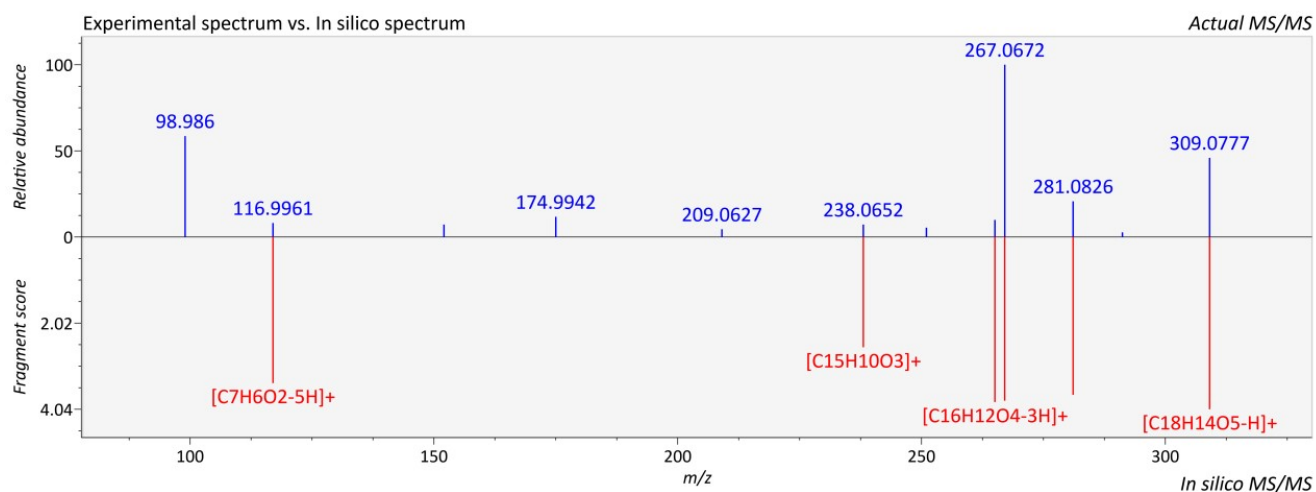

No.71 6-Hydroxyl-7-methoxyl-2-methoxymethyl-anthraquinone

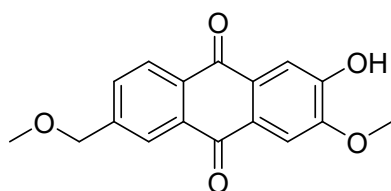

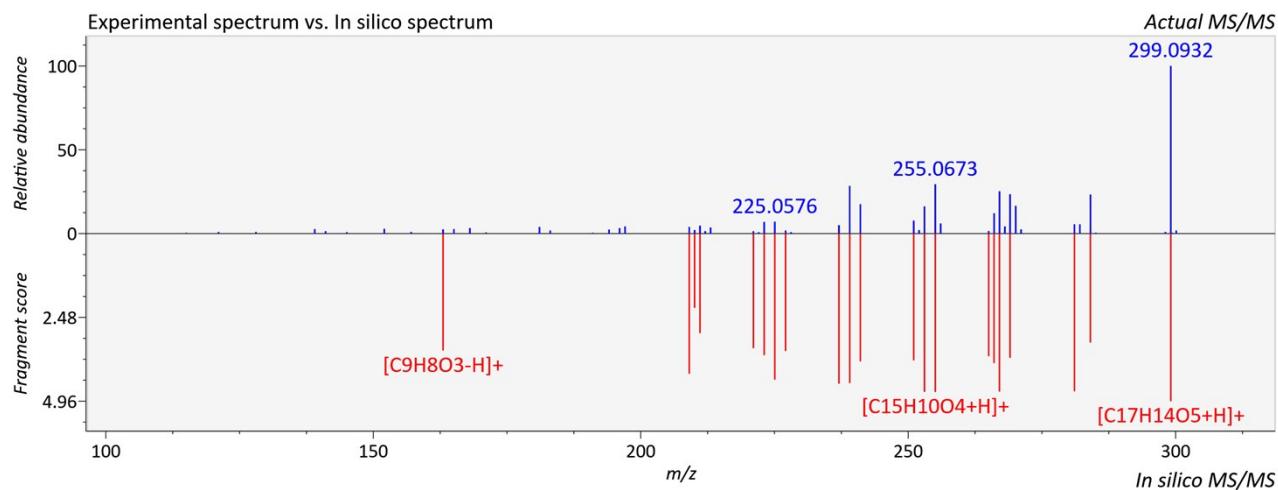

No.72 2-Acetoxyethyl-anthraquinone

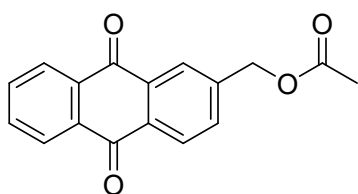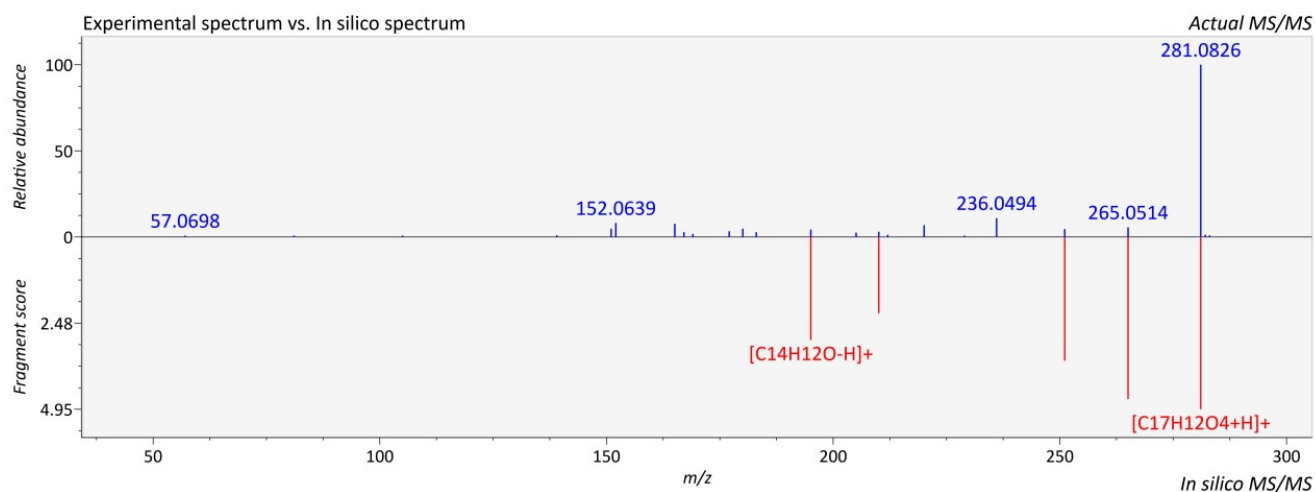

No.73 Fistulaquinones-C

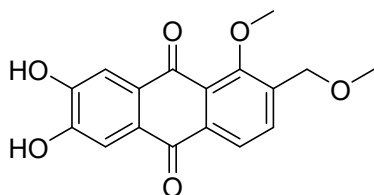

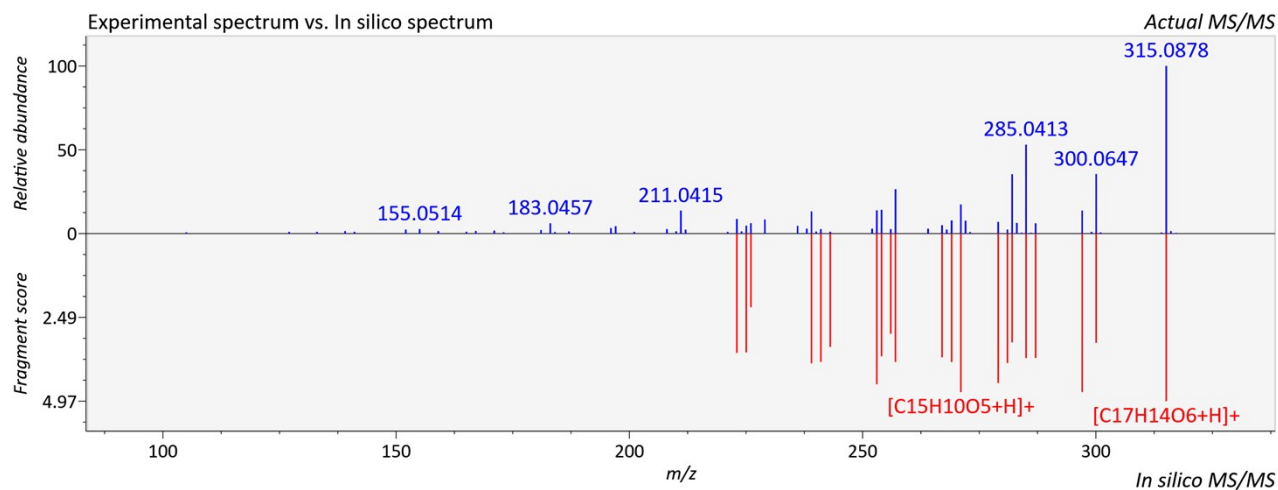

No.74 Damnacanthol-2-methoxymethyl

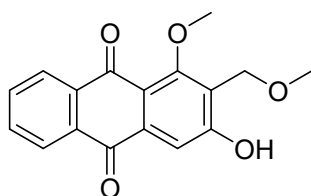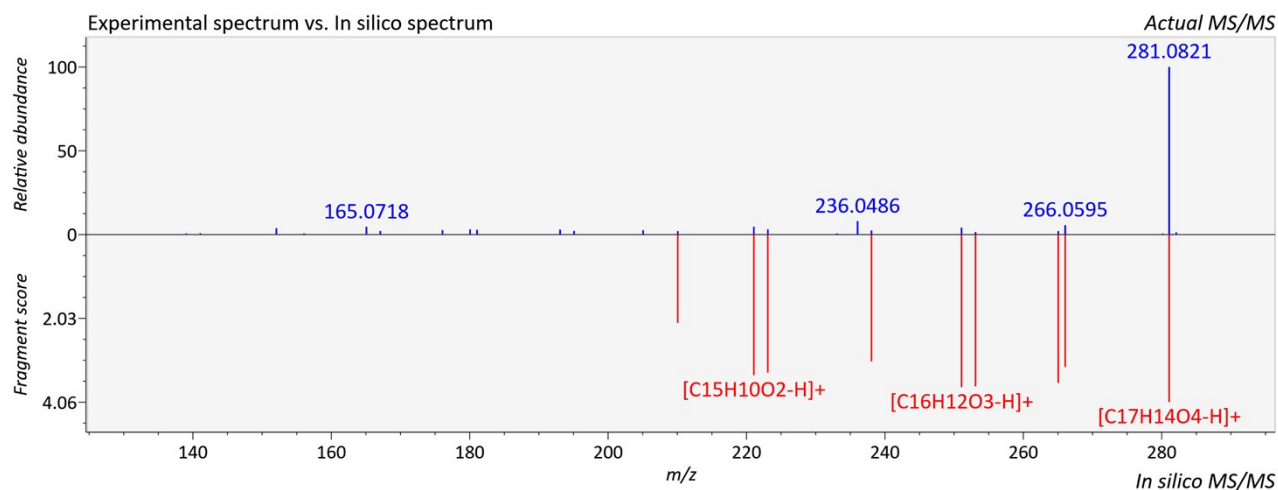

No.75 Ethyl 9,10-dihydro-1,3-dihydroxy-9,10-dioxo-2-anthracenecarboxylate

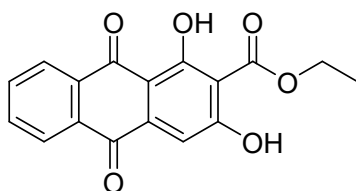

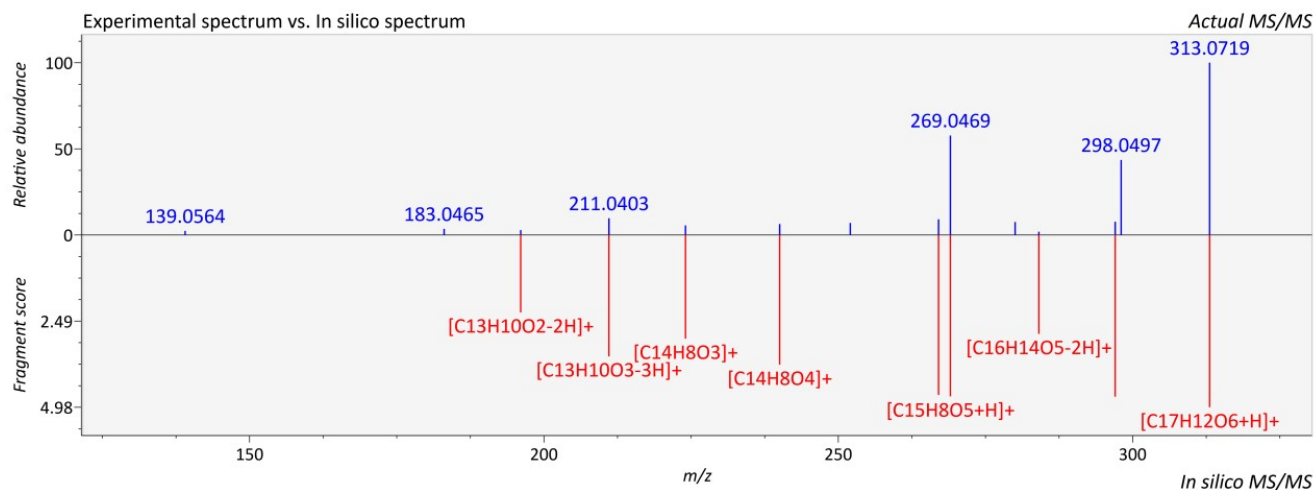

No.76 Lucidin

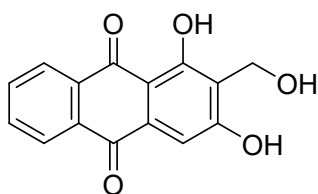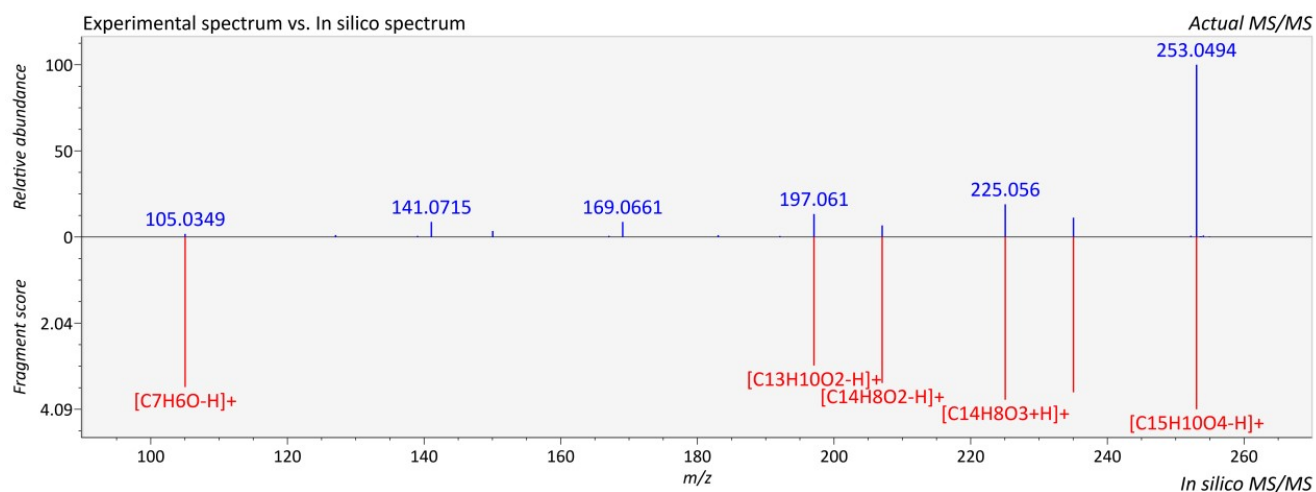

No.77 Dihydroactinidiolide

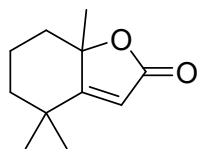

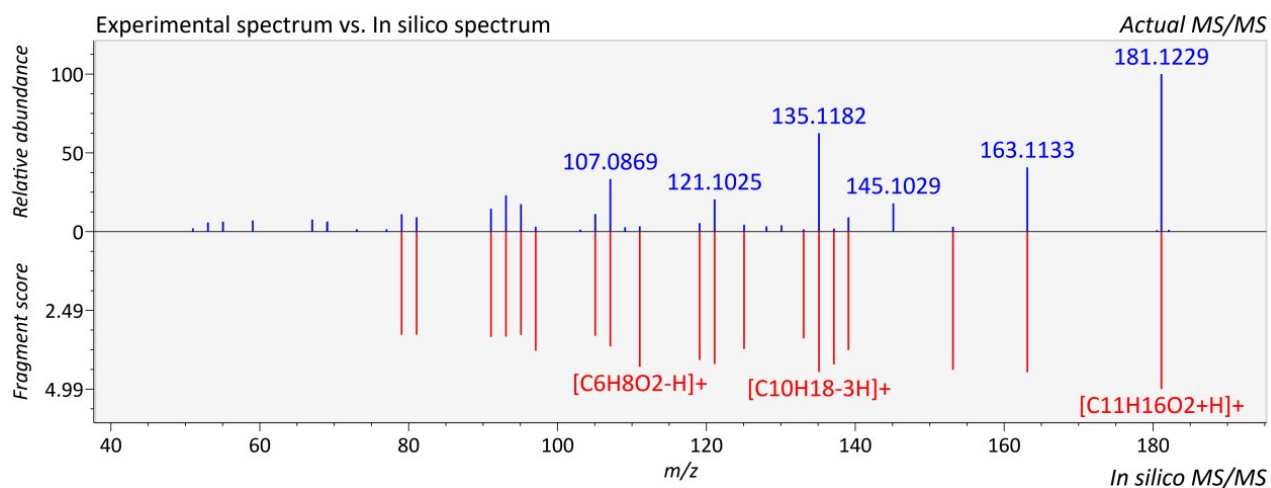

No.78 Alizarin 1-methyl ether

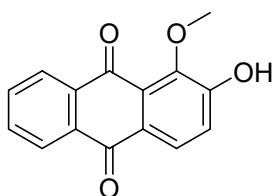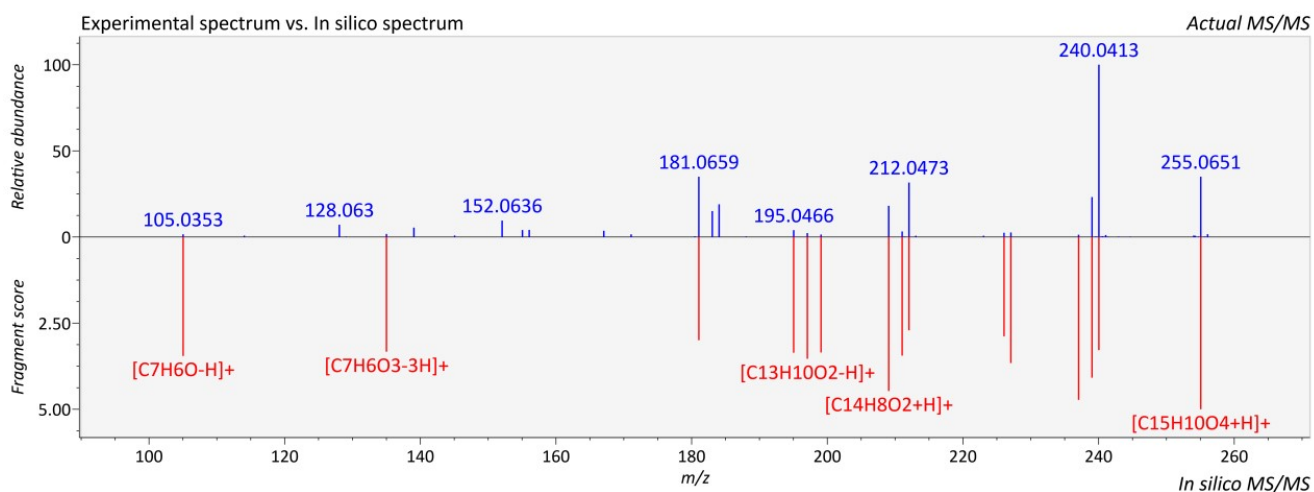

No.79 1,5-Dihydroxyl-3-carboxy-anthraquinone

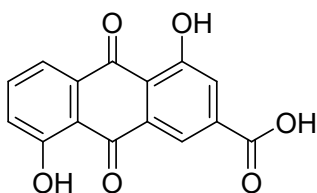

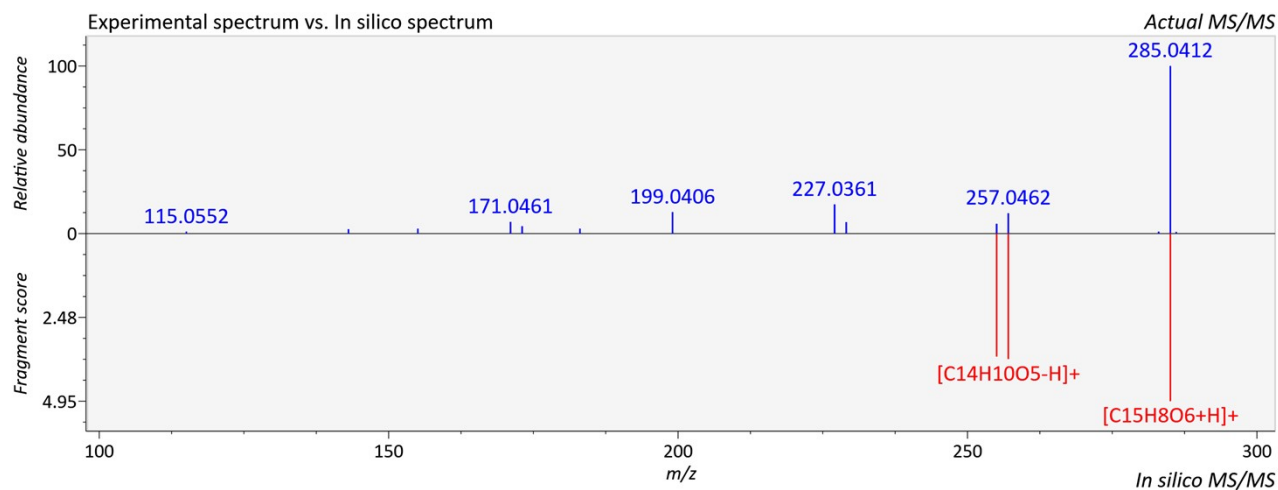

No.80 3-Hydroxyl-2,4-dimethoxyl-1-methyl-anthraquinone

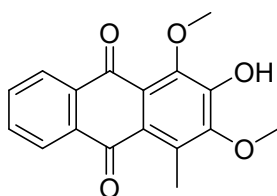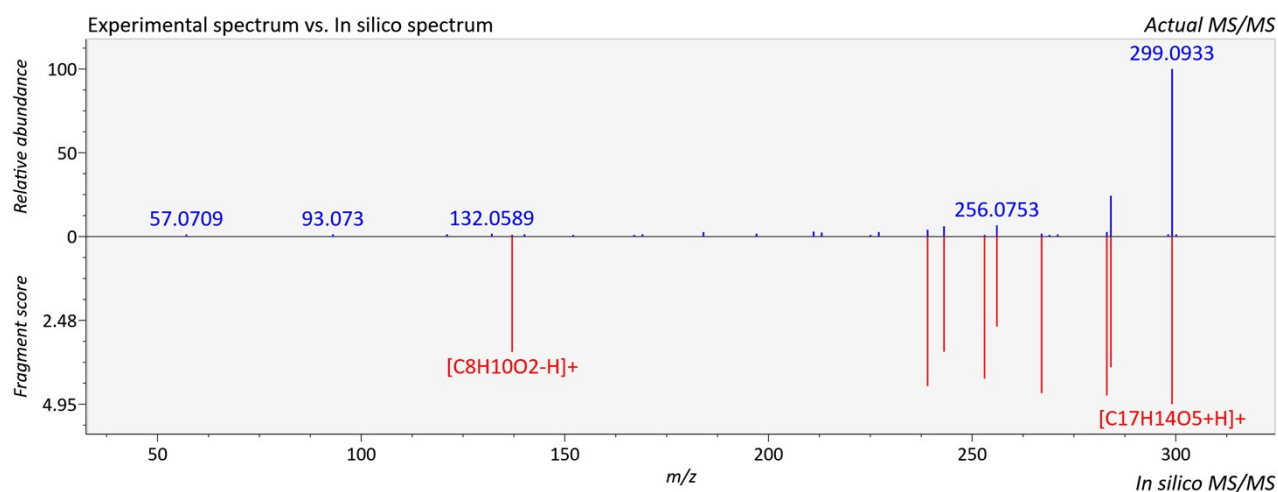

No.81 1-Hydroxyl-3,7-dialdehyde-anthraquinone

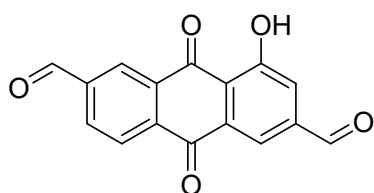

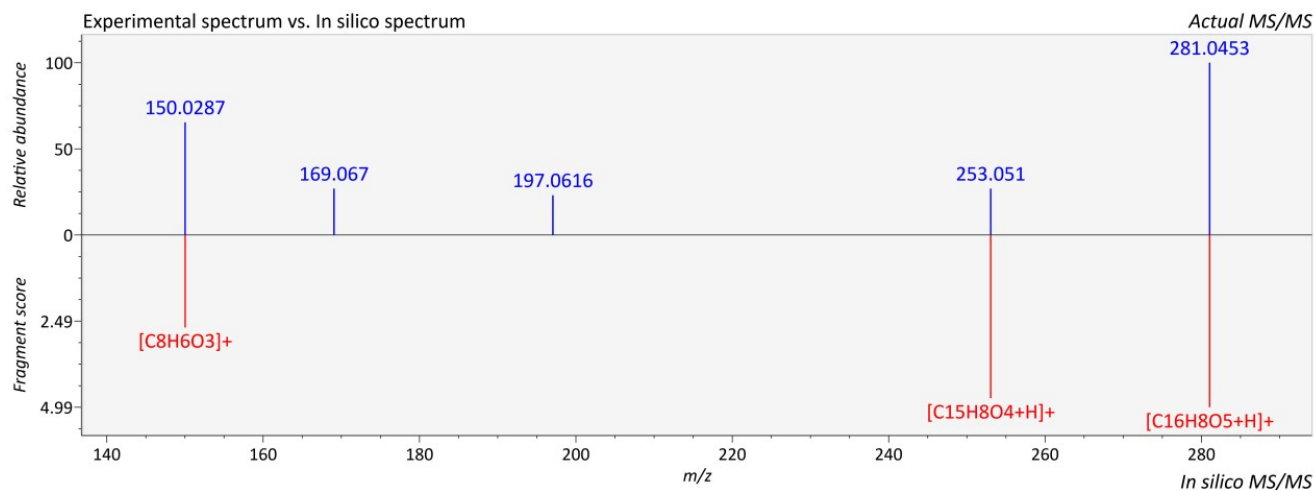

No.82 Lucidin  $\omega$ -methyl ether

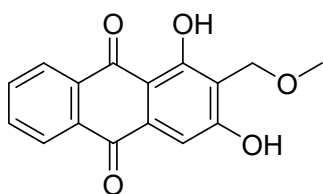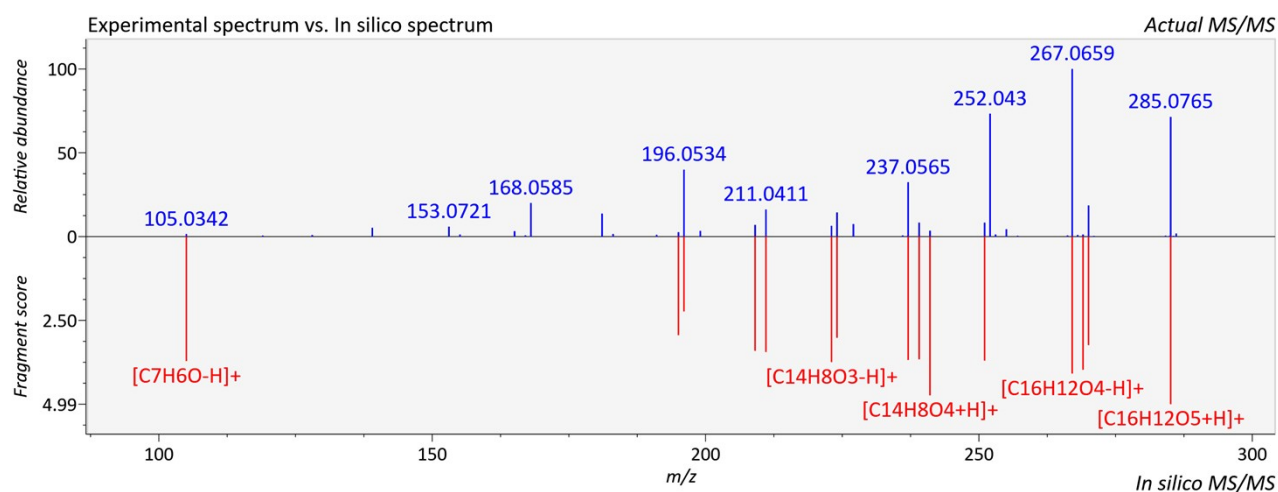

No.83 Alizarin

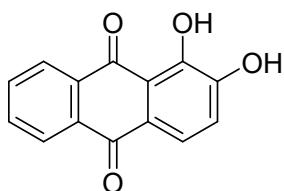

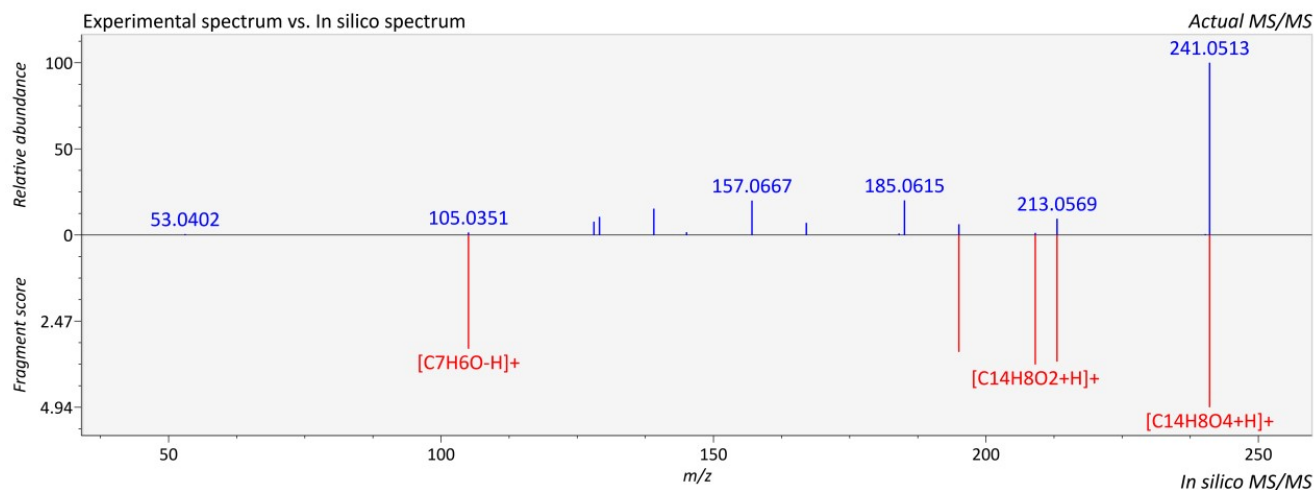

No.84 Rhodoptilometrin

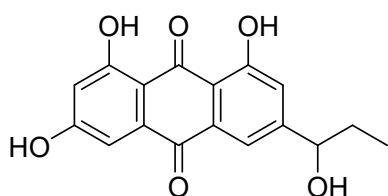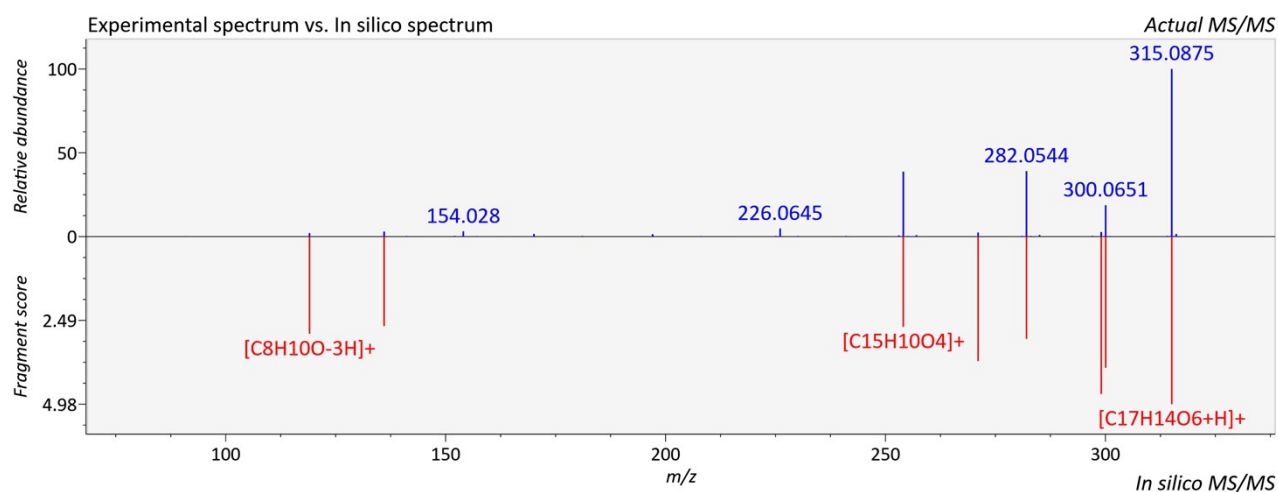

No.85 1,7-Dihydroxyl-3,6-dimethoxyl-anthraquinone

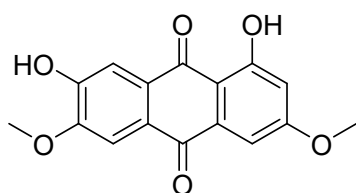

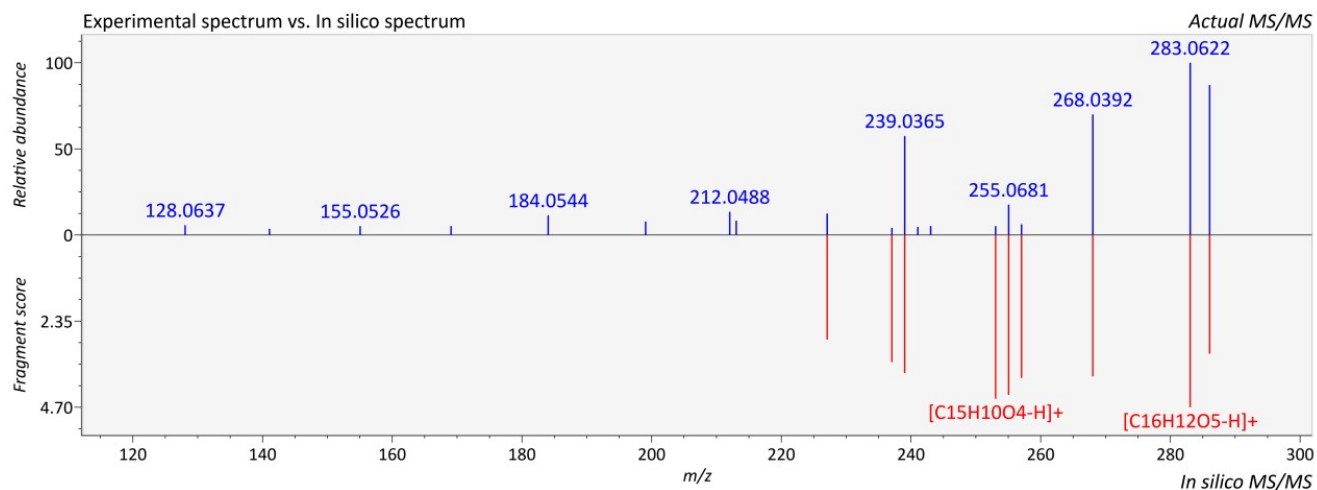

No.86 1-Formylanthraquinone

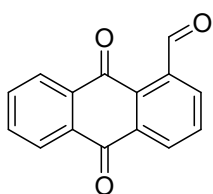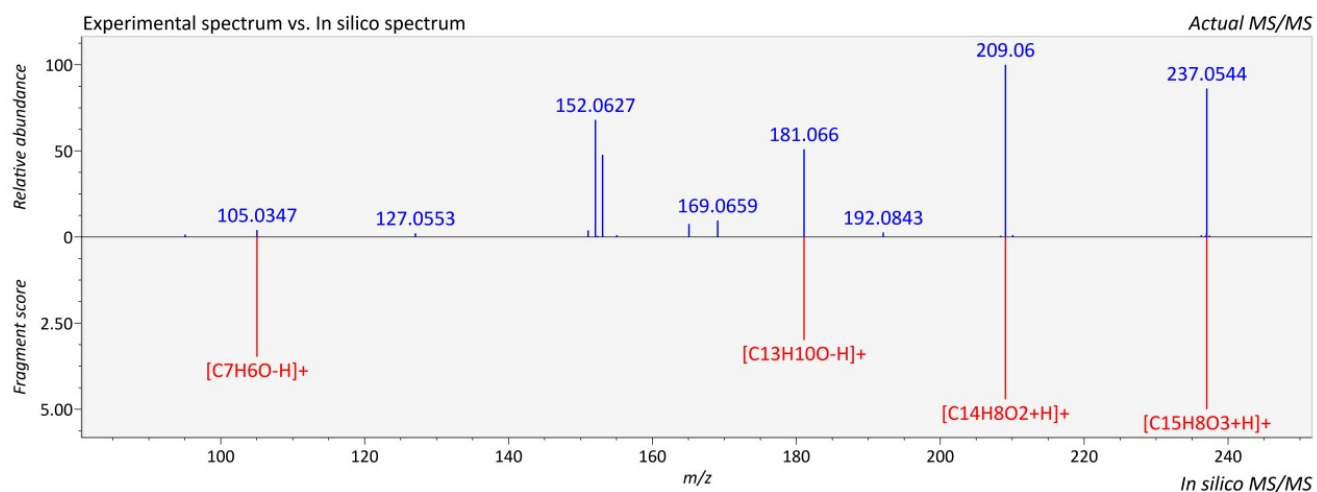

No.87 Alizarin 2-methyl ether

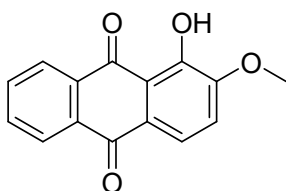

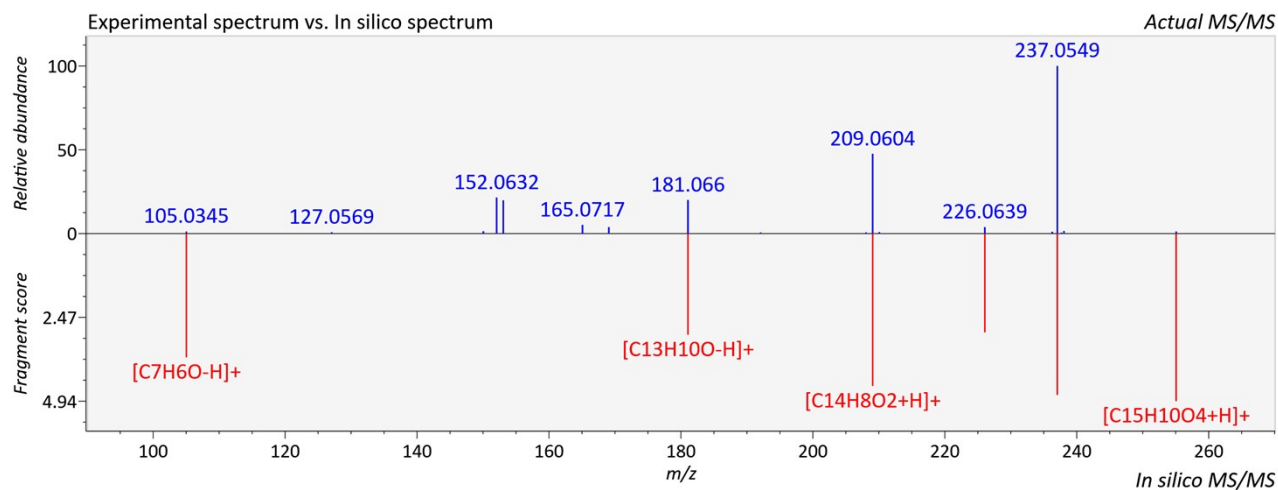

No.88 1,3,6-Trihydroxy-2-methoxy-9,10-anthracenedione

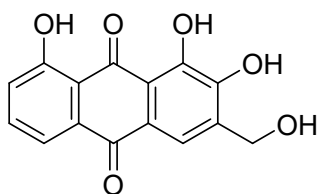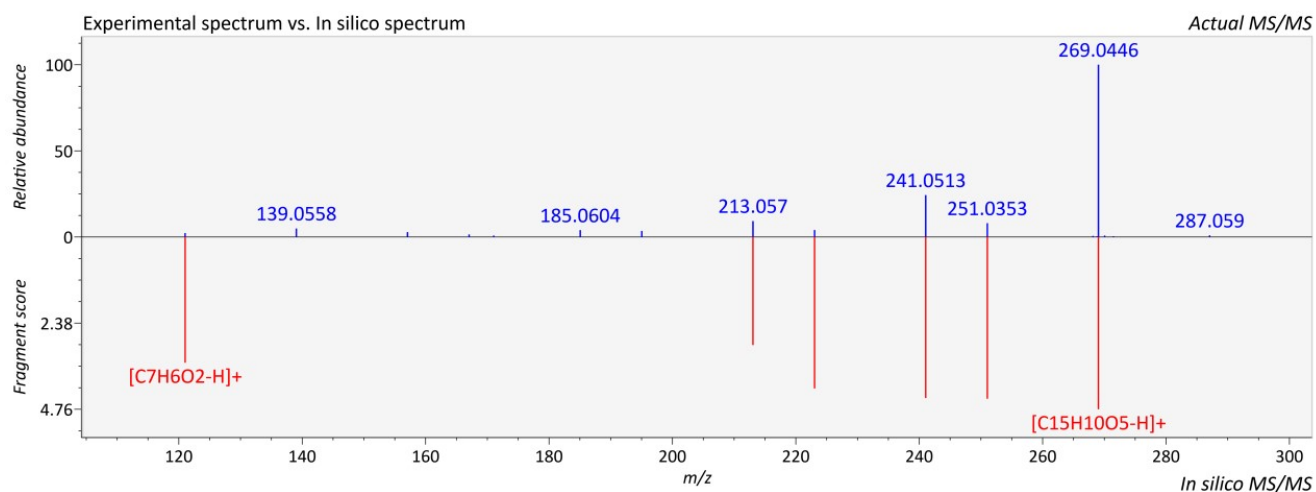

No.89 Nordamnacanthal

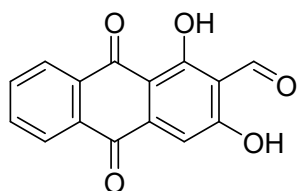

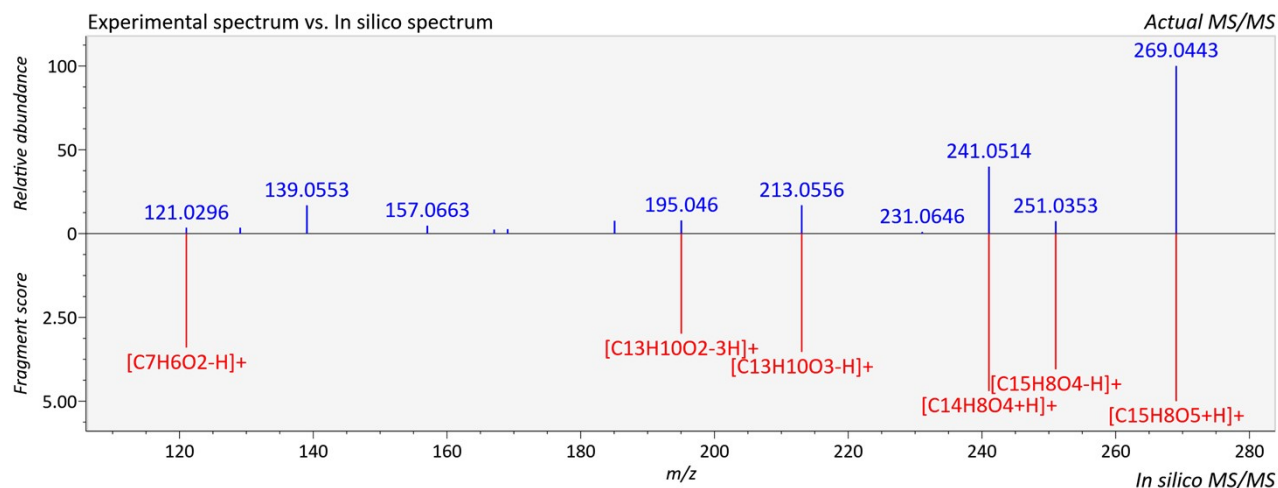

No.90 Robustaquinone F

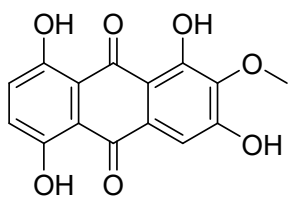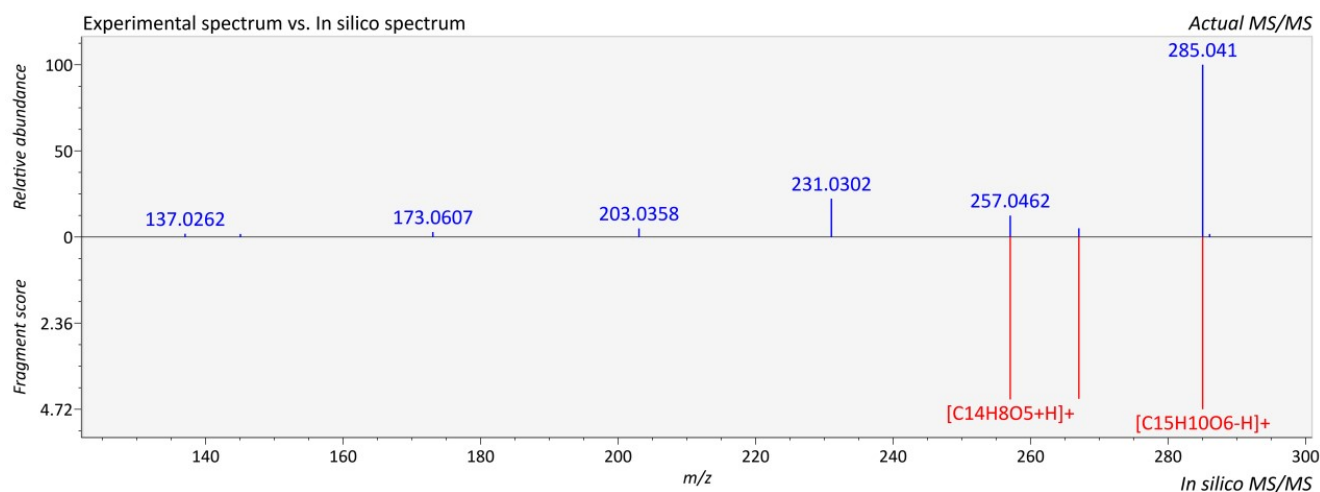

No.91 Alatonal

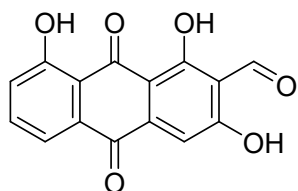

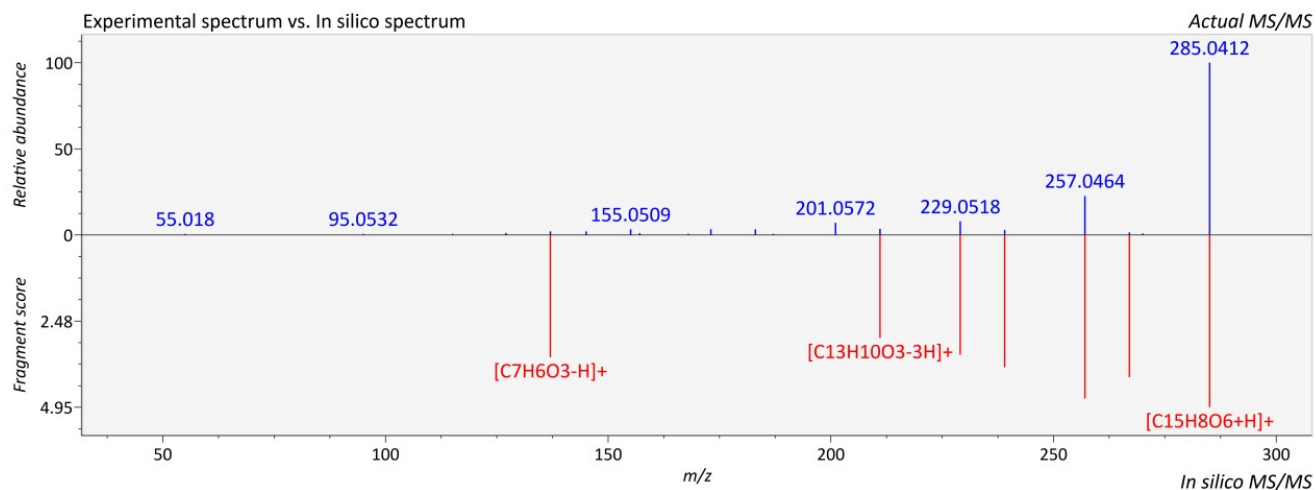

No.92 3-Hydroxyl-2-aldehyde-anthraquinone

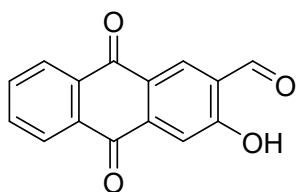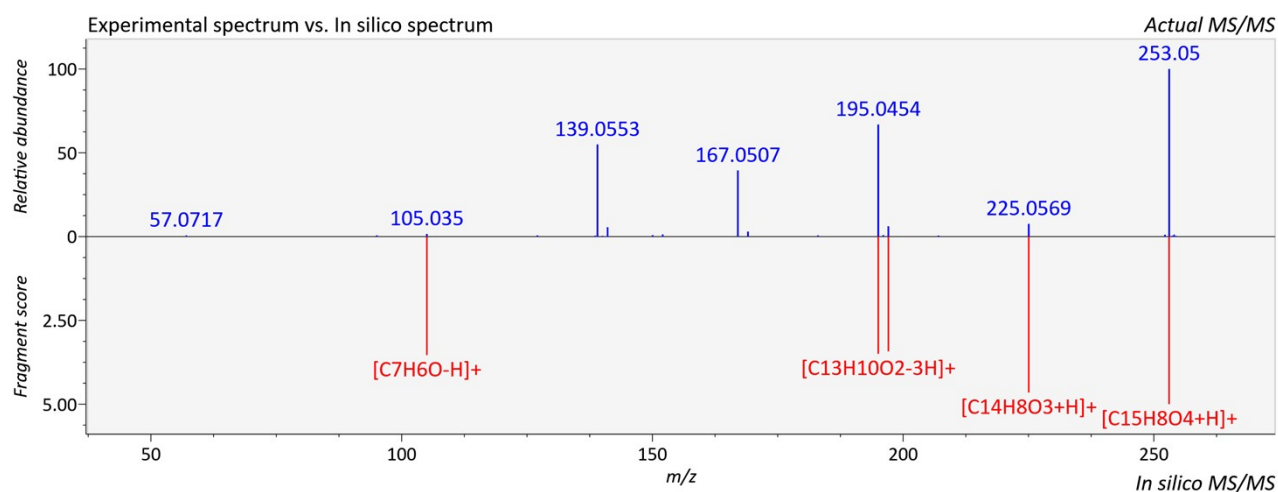

No.93 1-Hydroxyl-5,6-dimethoxyl-2-methyl-anthraquinone

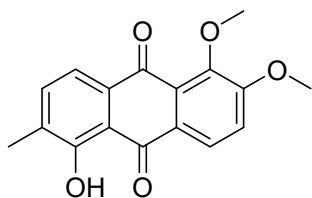

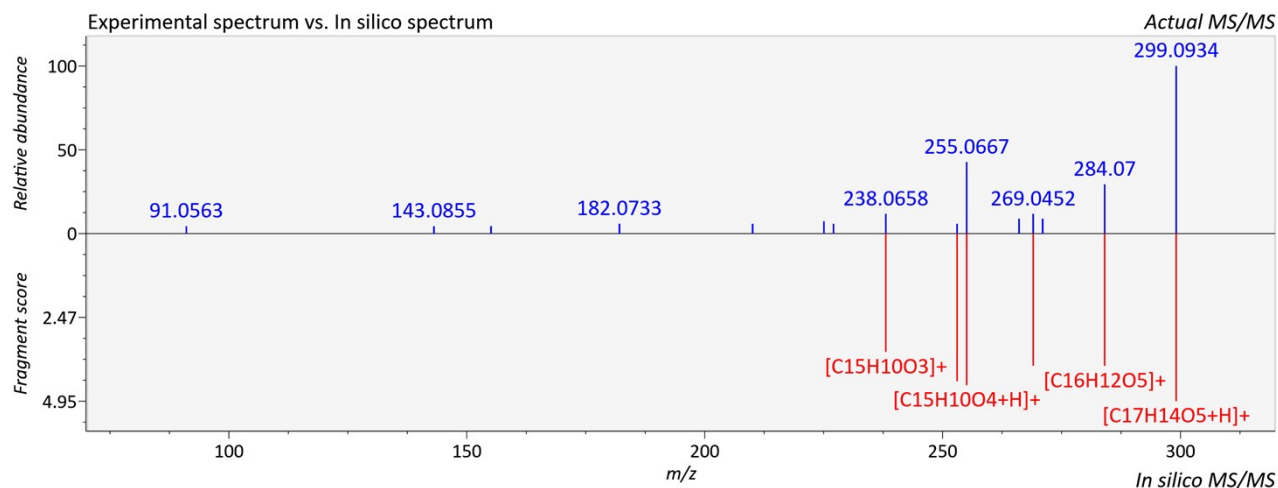

No.94 1,3,5-Trihydroxy-2-(methoxymethyl)-9,10-anthracenedione

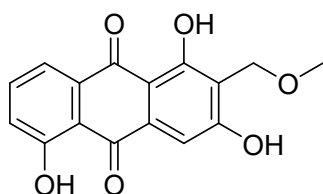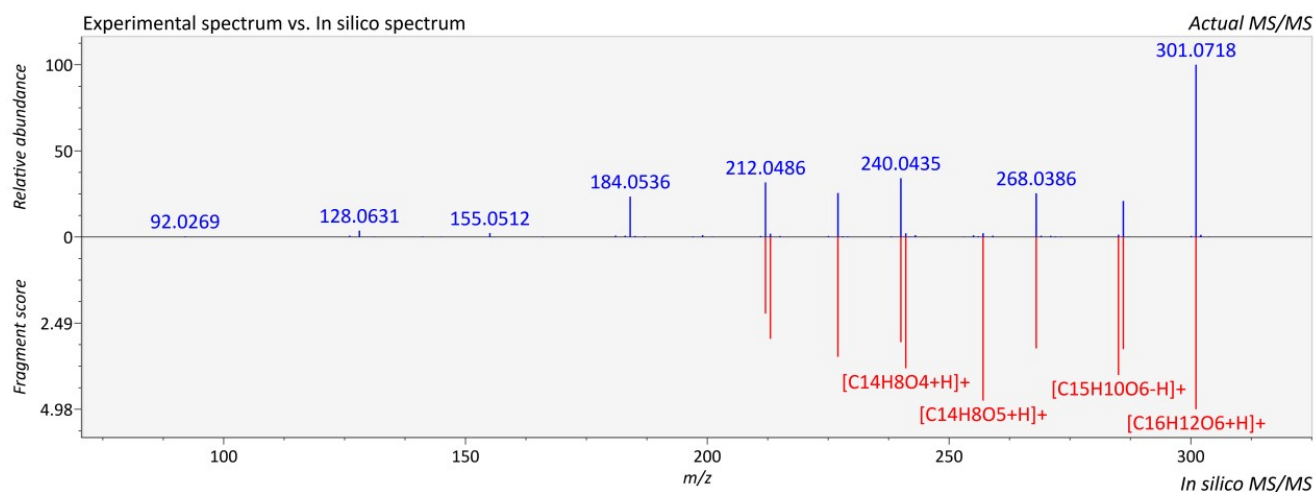

No.95 2,7,8-Trihydroxyl-1-methoxyl-3-methyl-anthraquinone

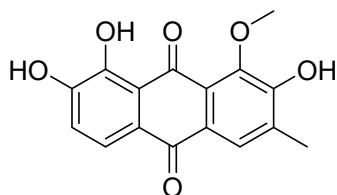

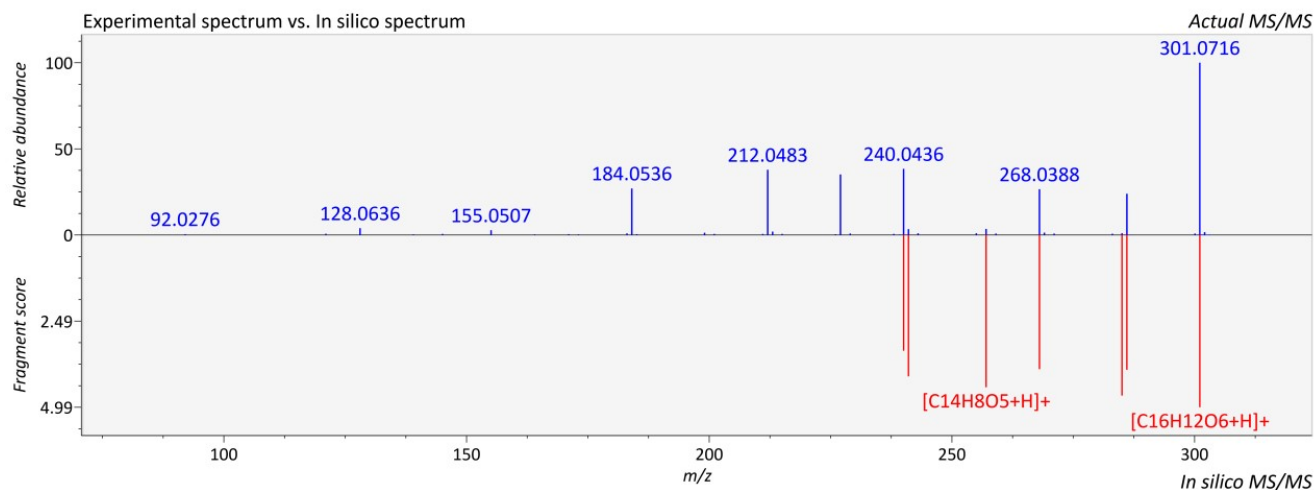

No.96 Isorhodoptilometrin-1-methoxyl

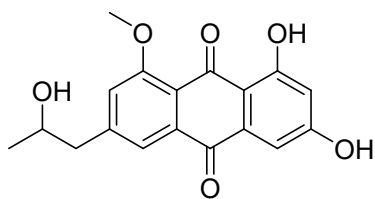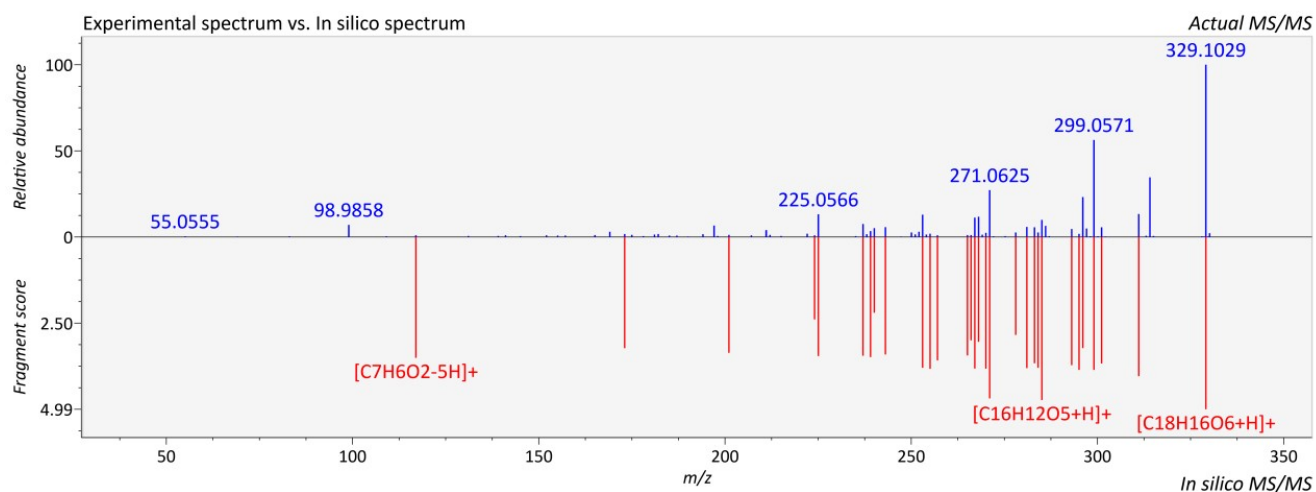

No.97 Rubiadin 1-methyl ether

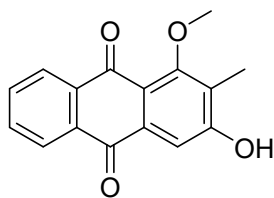

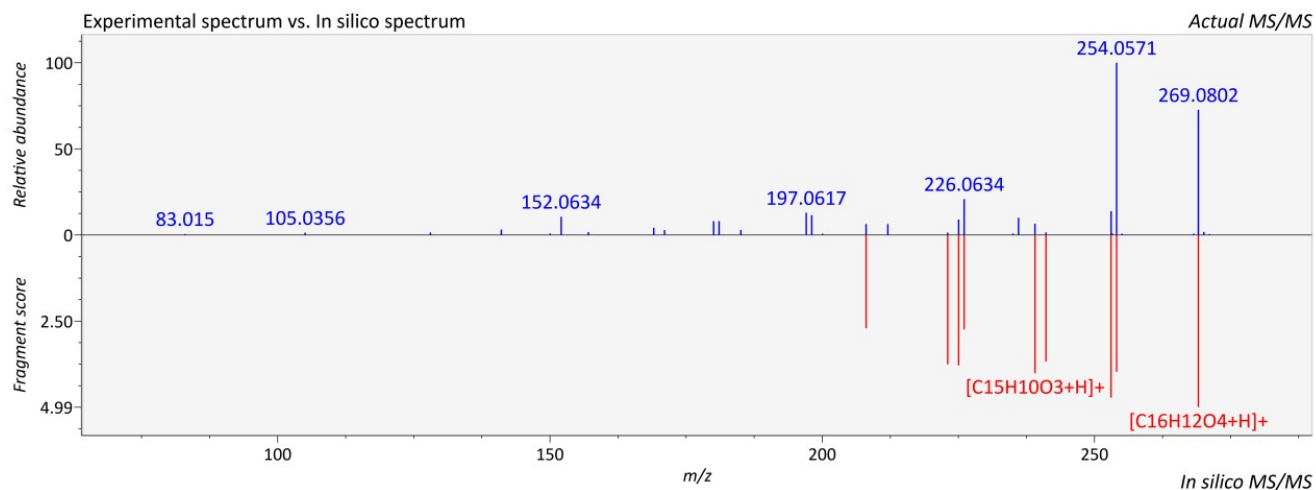

No.98 2-Dimethoxymethyl-anthraquinone

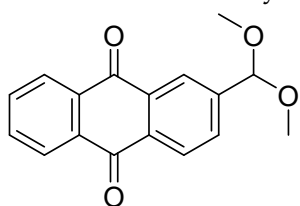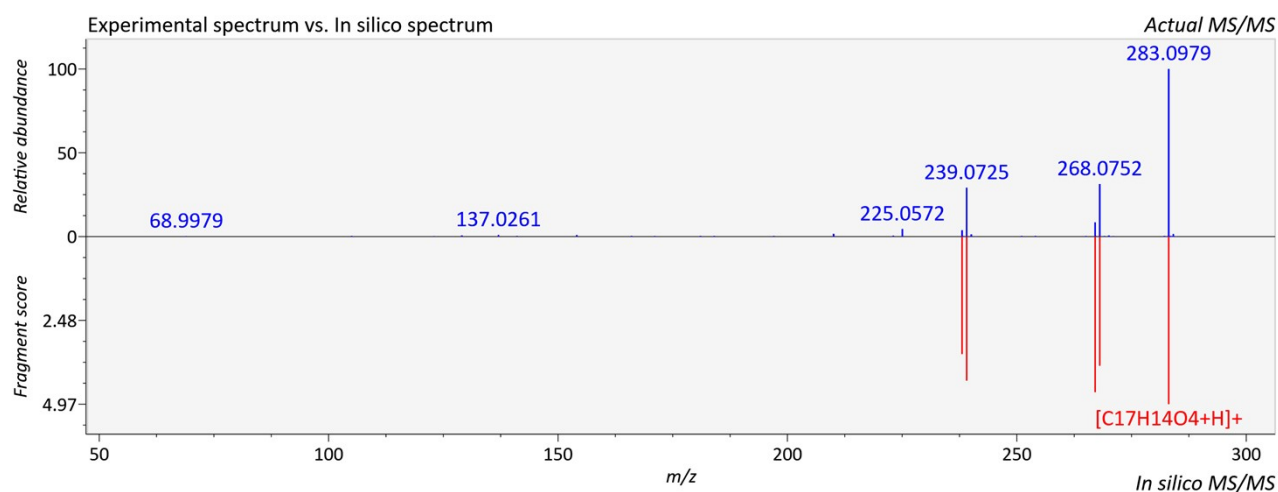

No.99 Obtusifolin-6-hydroxyl

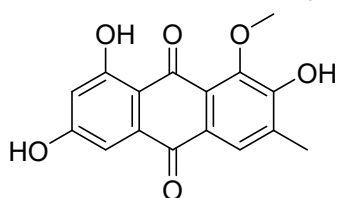

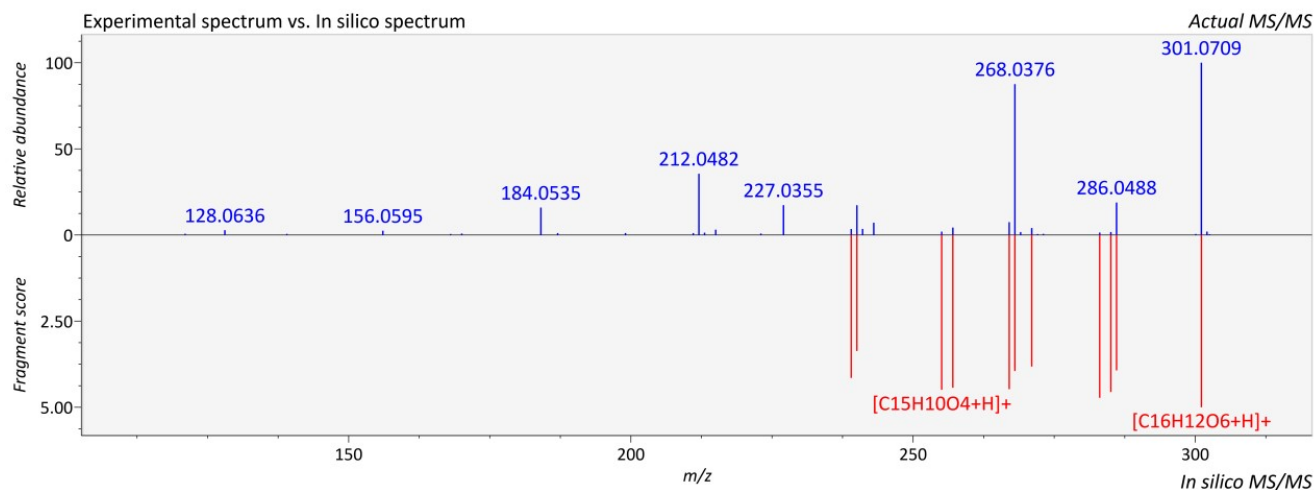

No.100 Rubiadin-6-hydroxyl

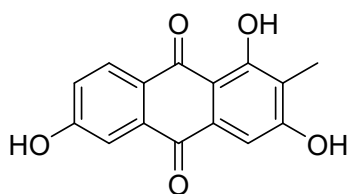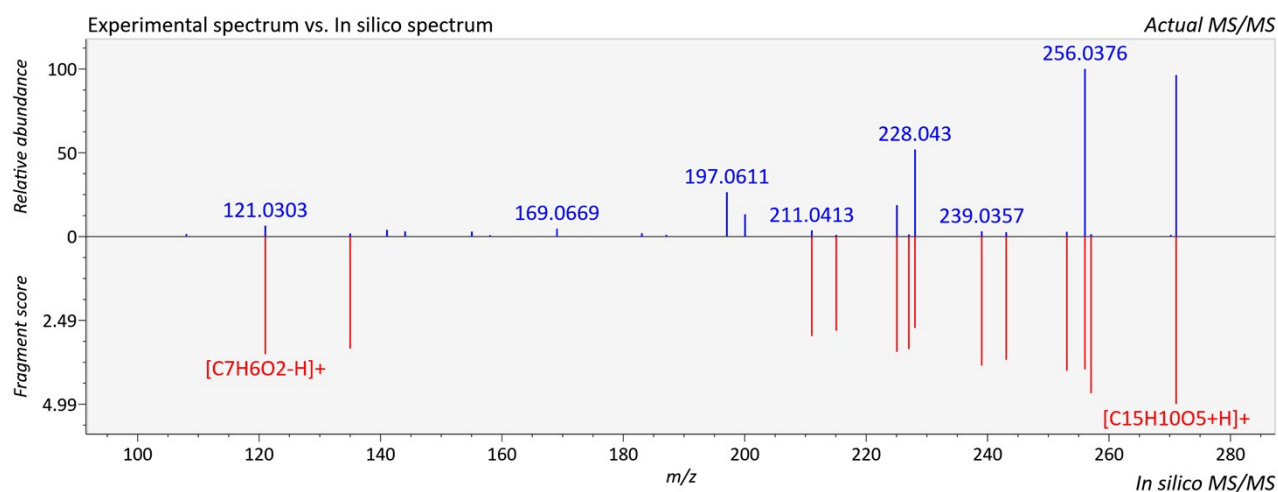

No.101 1-Hydroxyl-6,7-dimethoxy-2-methyl-anthraquinone

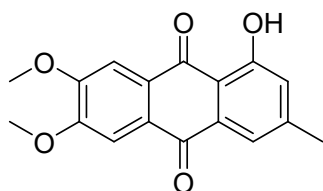

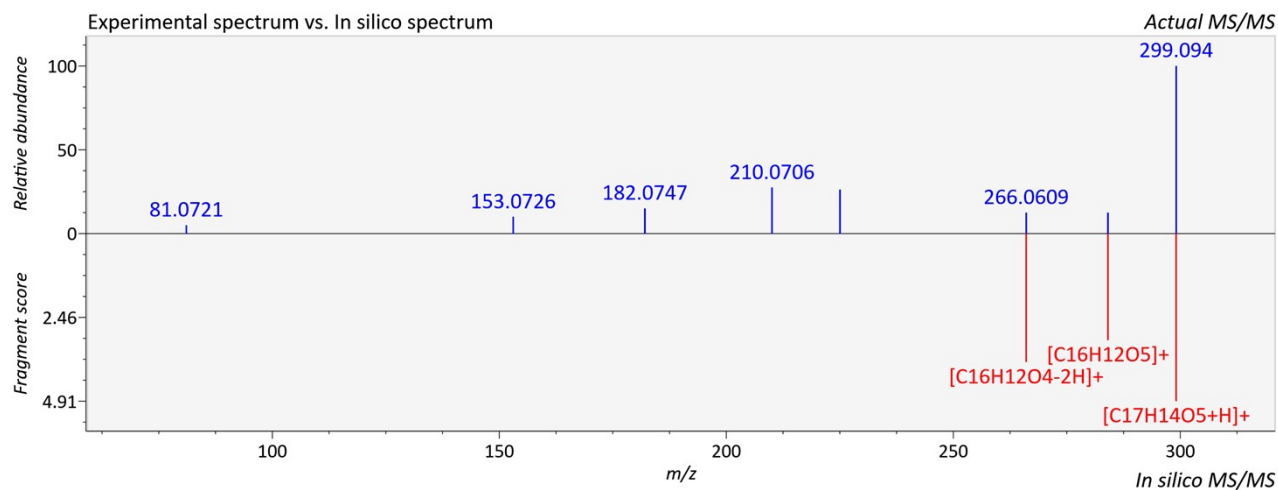

No.102 1-Hydroxyl-2-carbaldehyde-anthraquinone

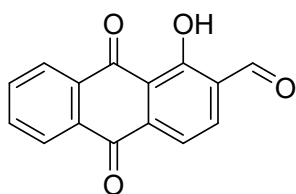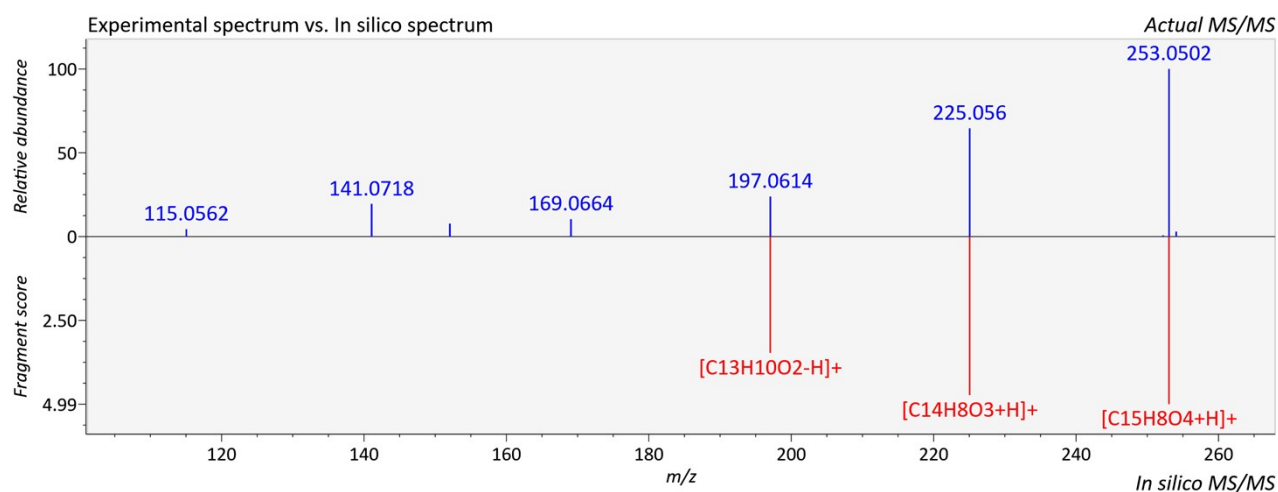

No.103 6-Hydroxyl-2-methoxymethyl-anthraquinone

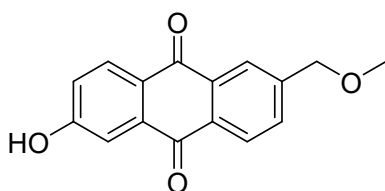

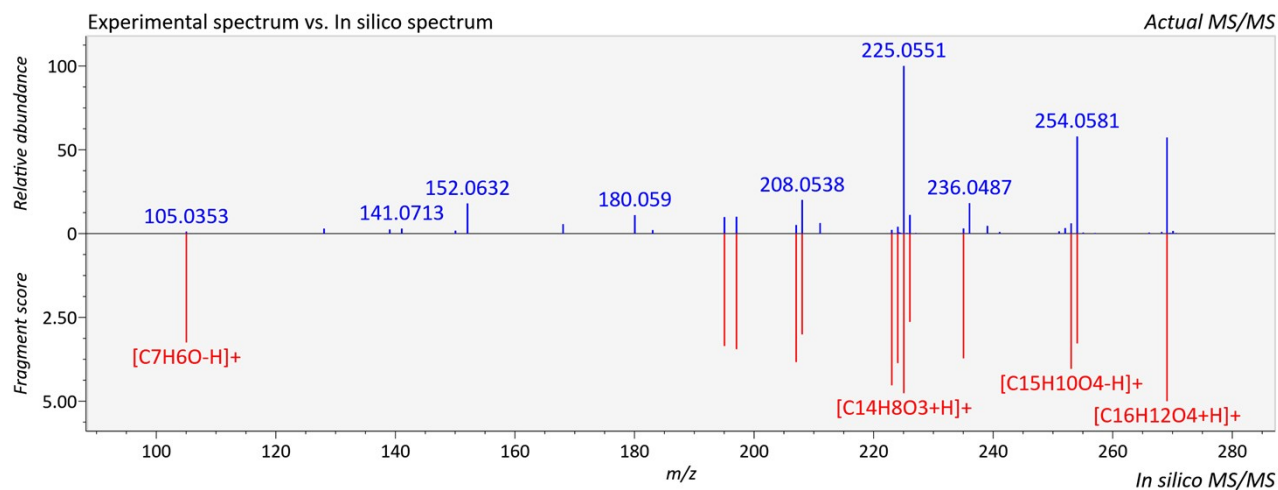

No.104 2-(Methoxycarbonyl)anthraquinone

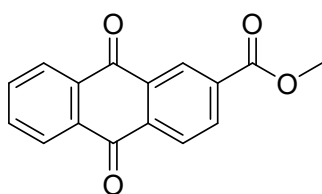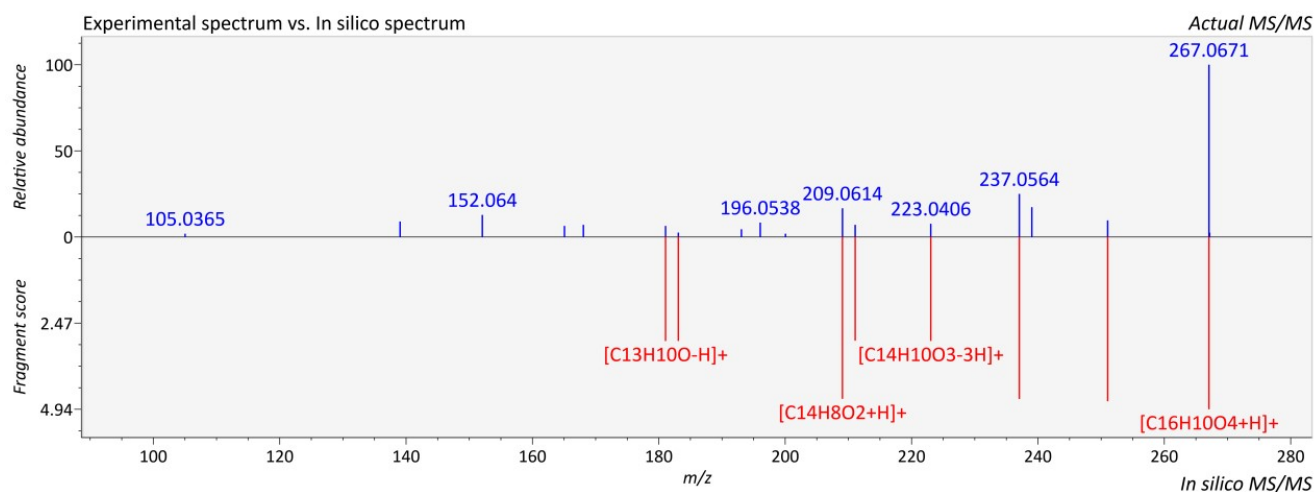

No.105 1,5-Dihydroxy-2-methoxy-9,10-anthracenedione

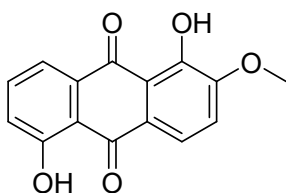

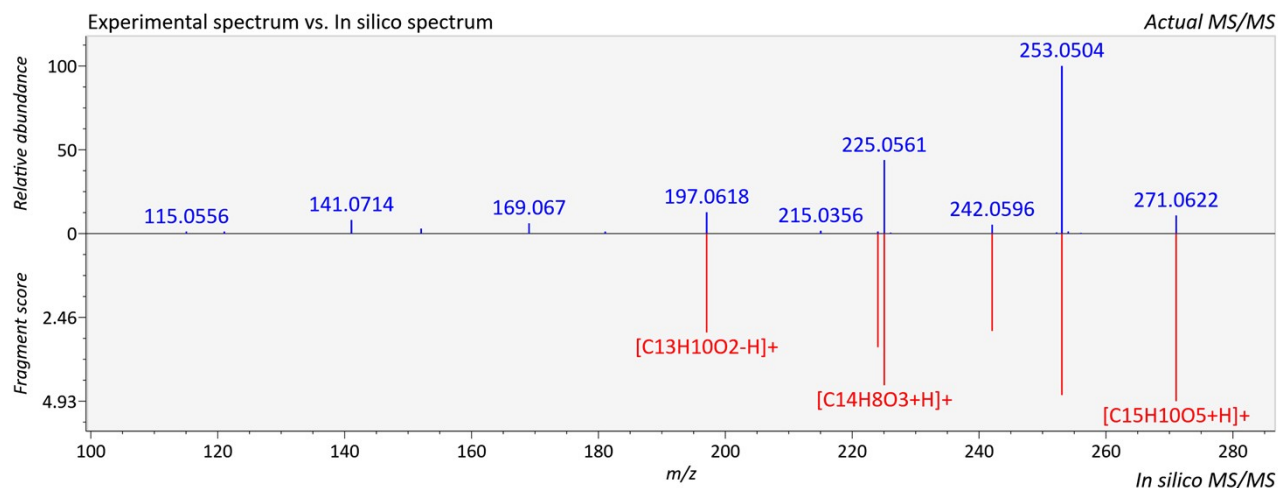

No.106 8-Hydroxyl-2-methyl-3-carbomethoxy-anthraquinone

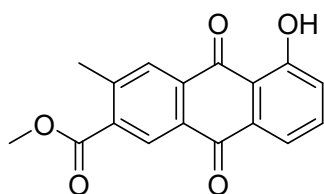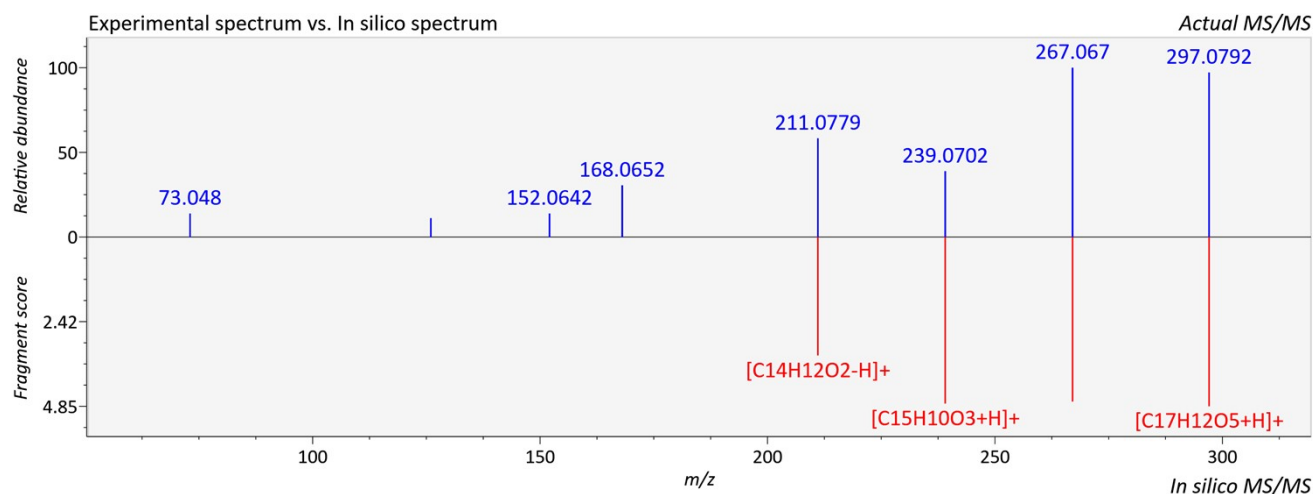

No.107 1,5,8-Trihydroxyl-2-methoxyl-anthraquinone

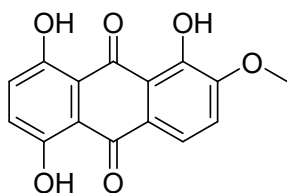

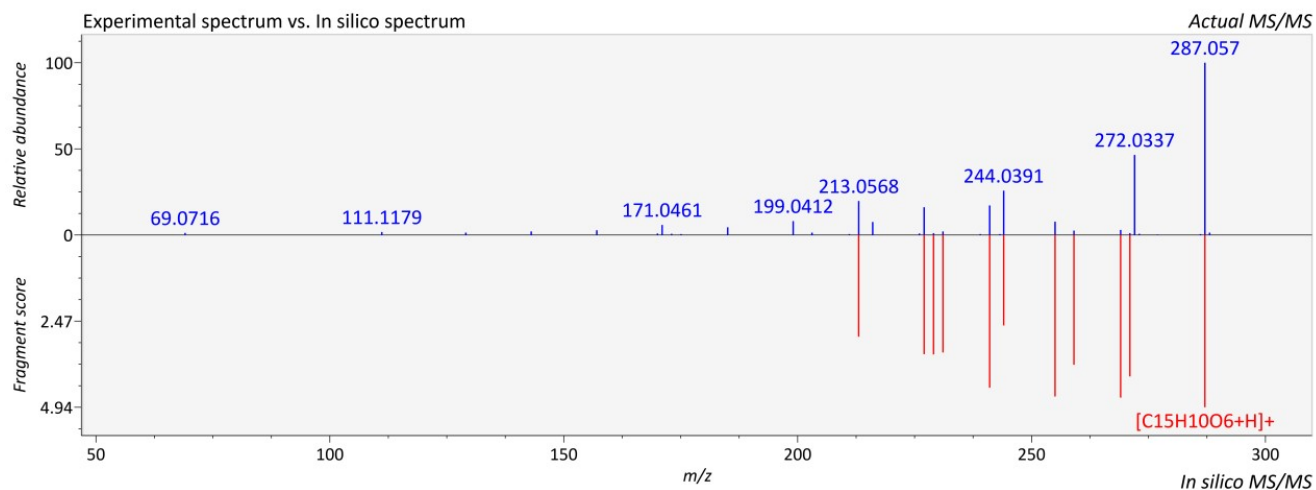

No.108 2-Hydroxyl-3-methyl-anthraquinone

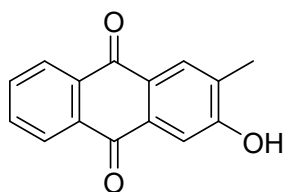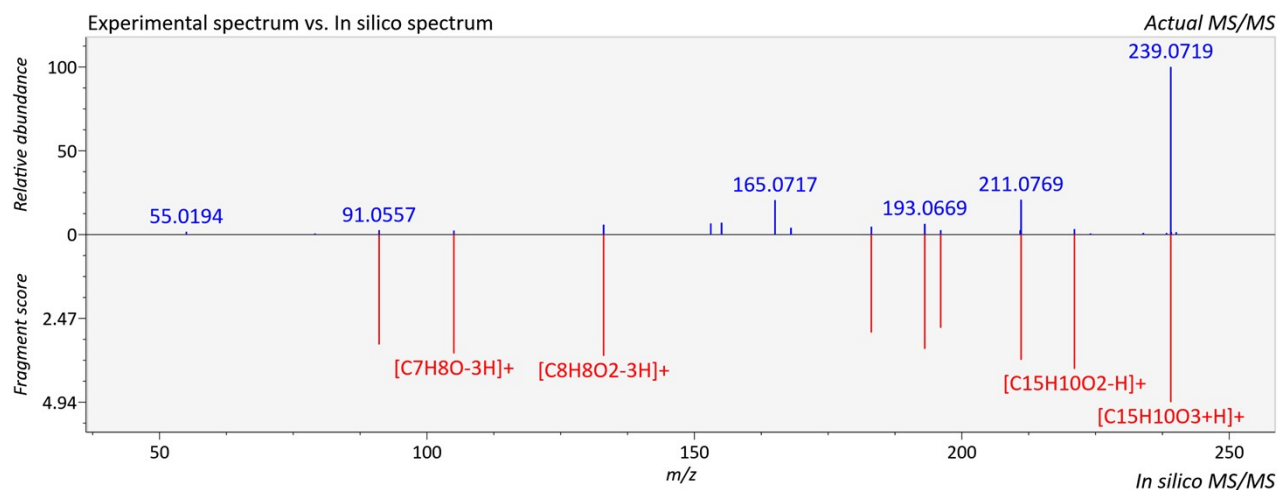

No.109 Morindone 5-methyl ether

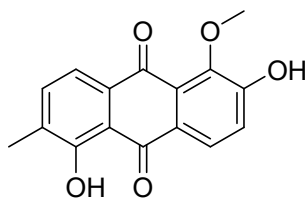

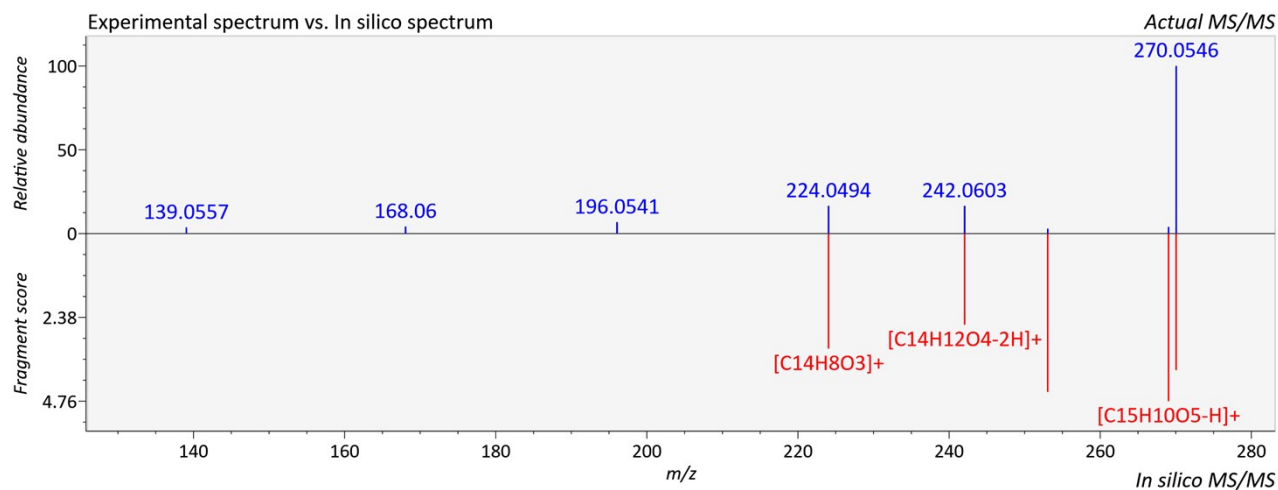

No.110 Morindone

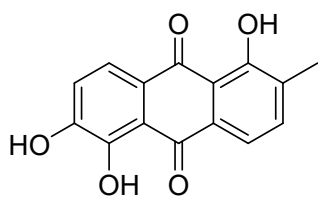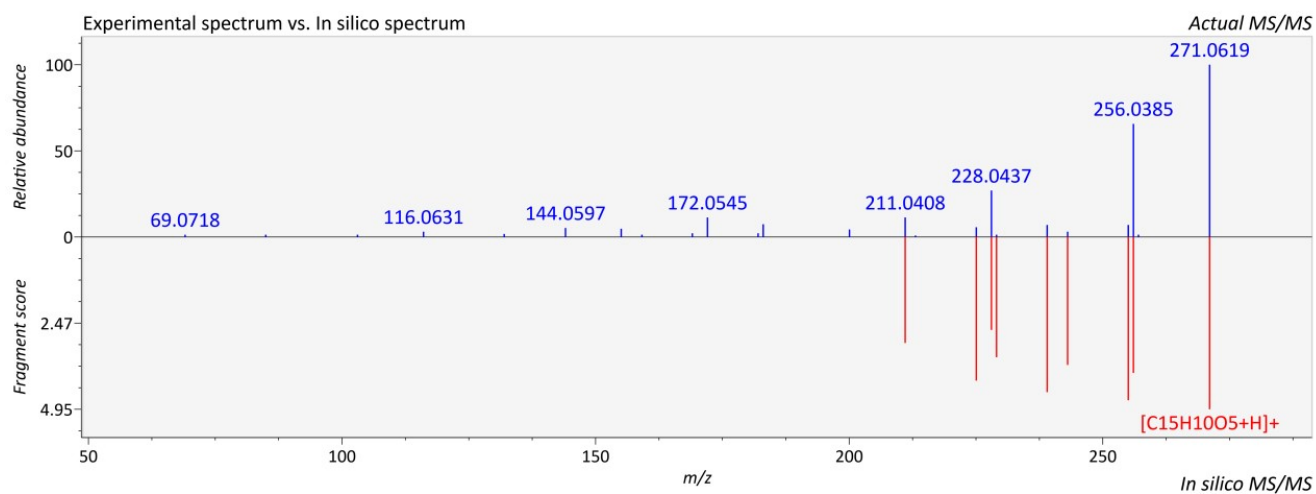

No.111 Xanthorin

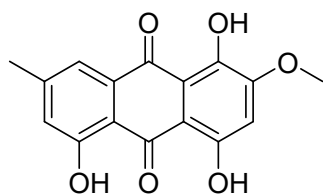

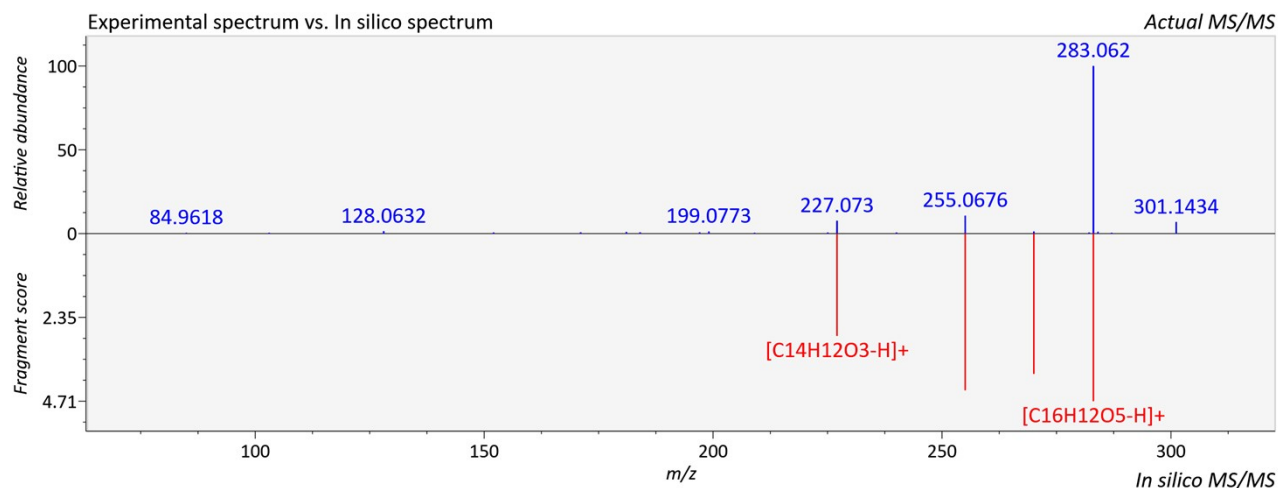

No.112 1,6,7-Trihydroxyl-3-methoxyl-8-methoxymethyl-anthraquinone

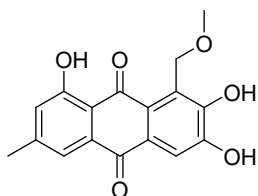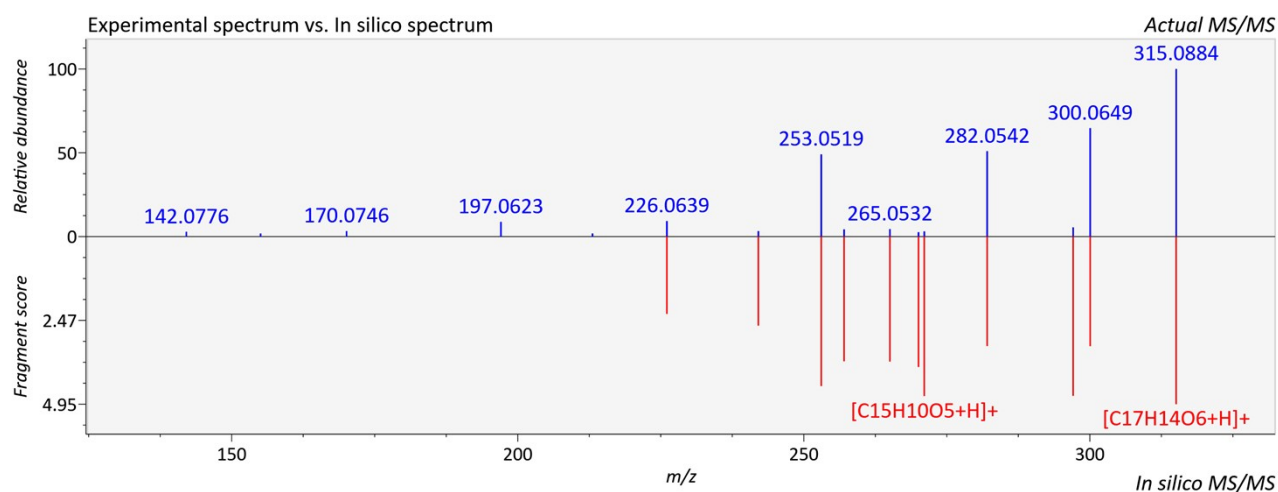

No.113 1,2-Dihydroxy-6-methyl-9,10-anthracenedione

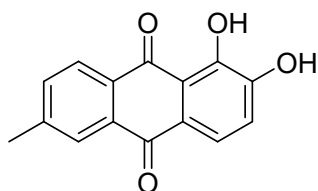



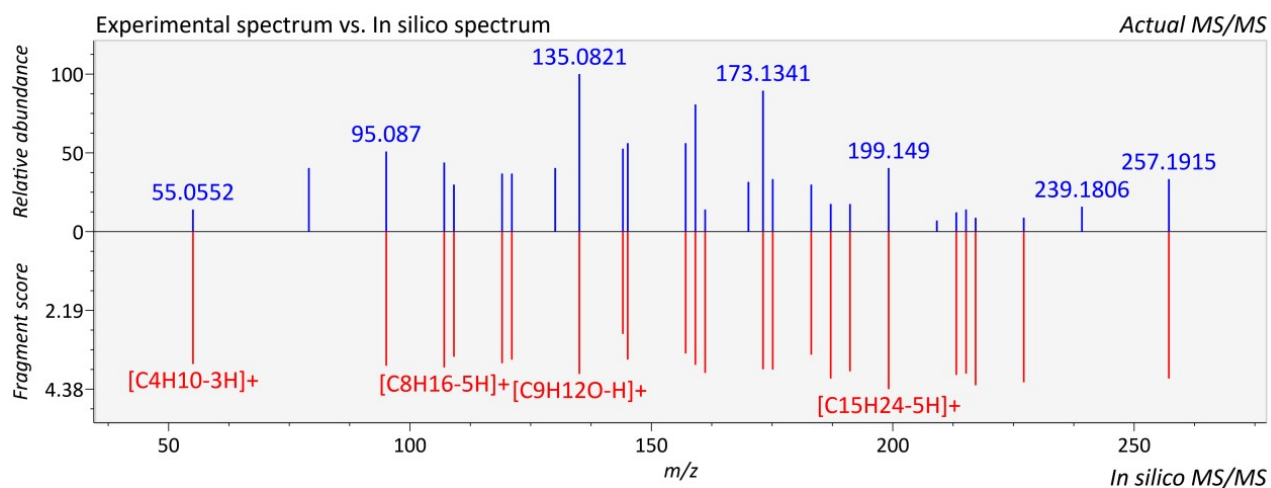

No.116 1,3-Dihydroxyl-6-methoxyl-2-ethoxymethyl-anthraquinone

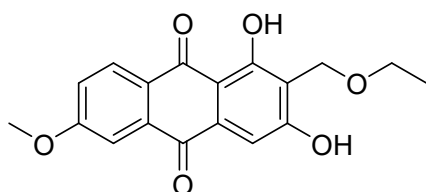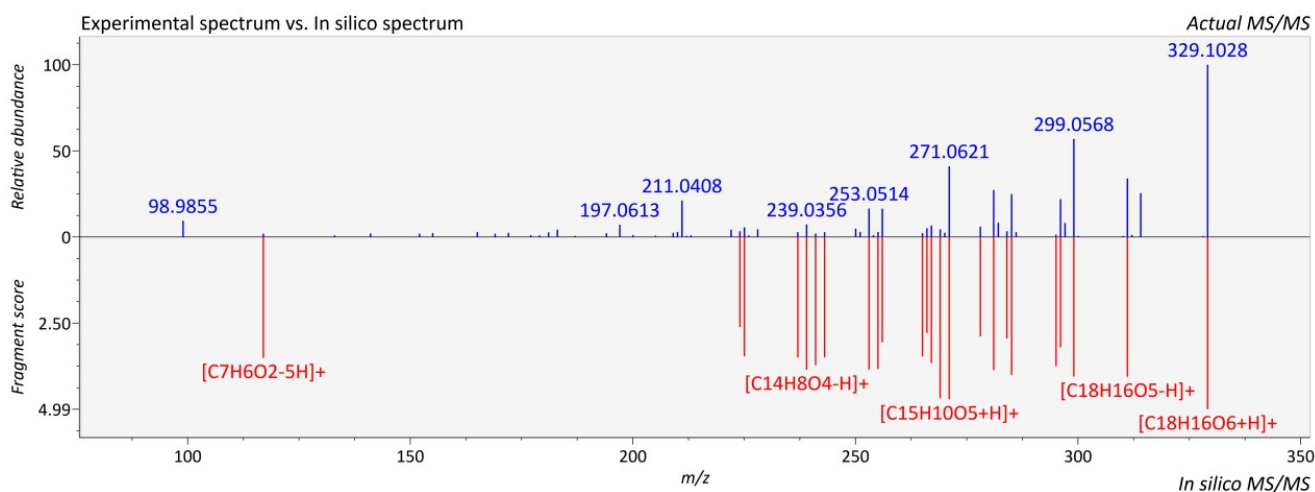

No.117 Soranjidiol

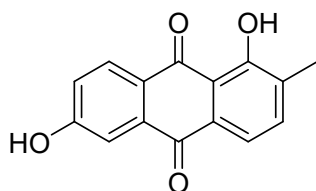

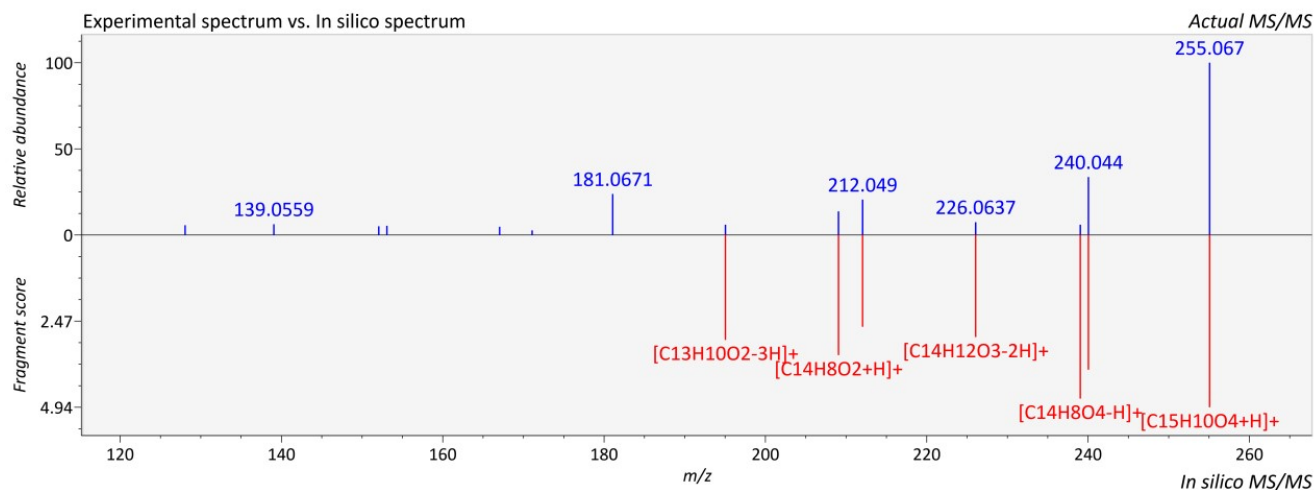

No.118 Emodin-1,6-dimethoxyl

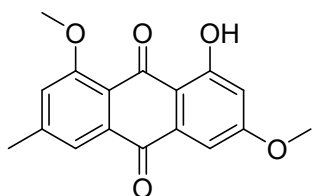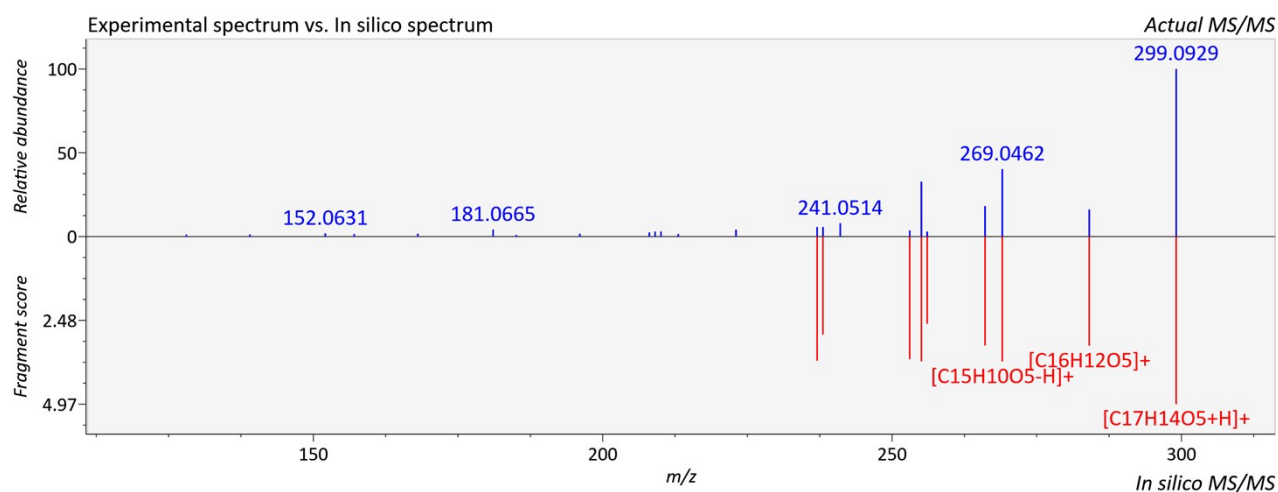

No.119 Munjistin

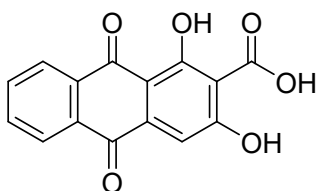

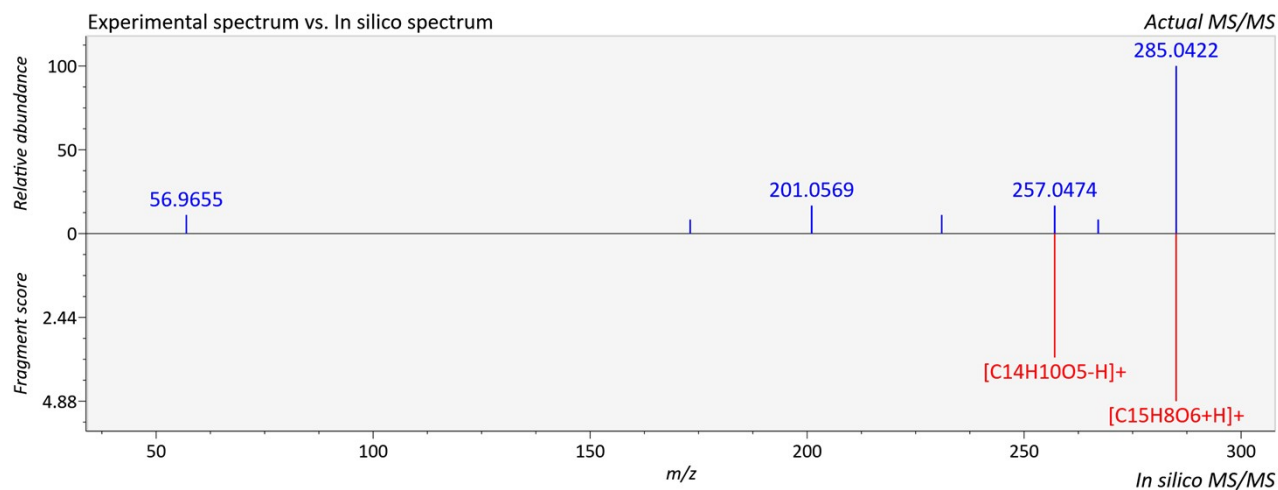

No.120 Farnisin

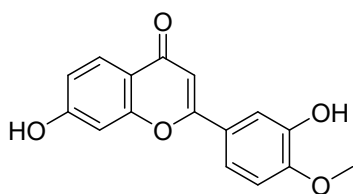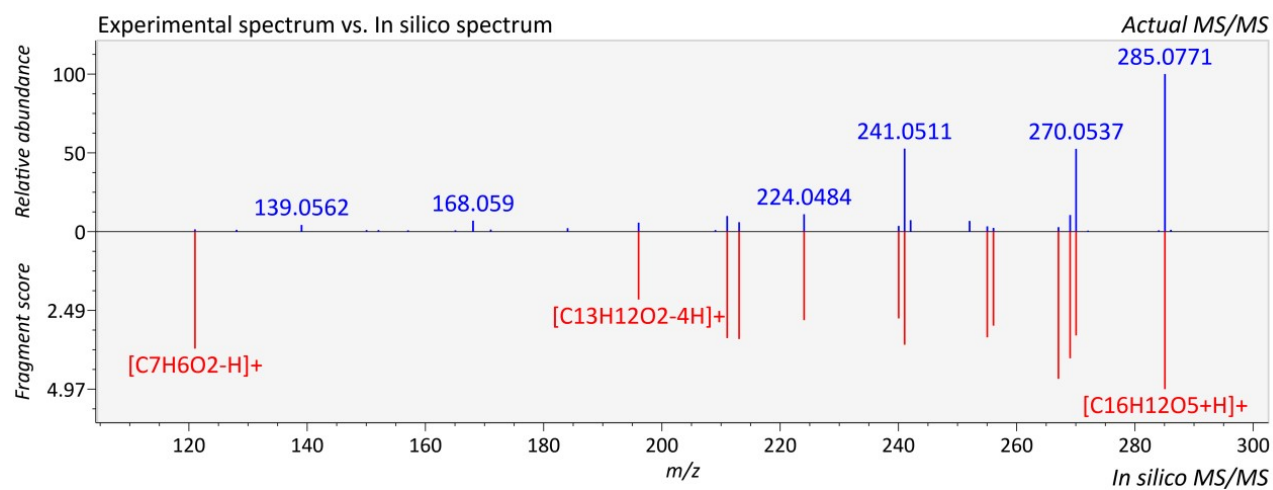

No.121 Clethric acid

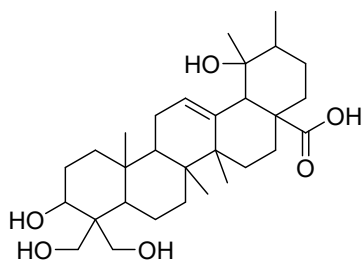

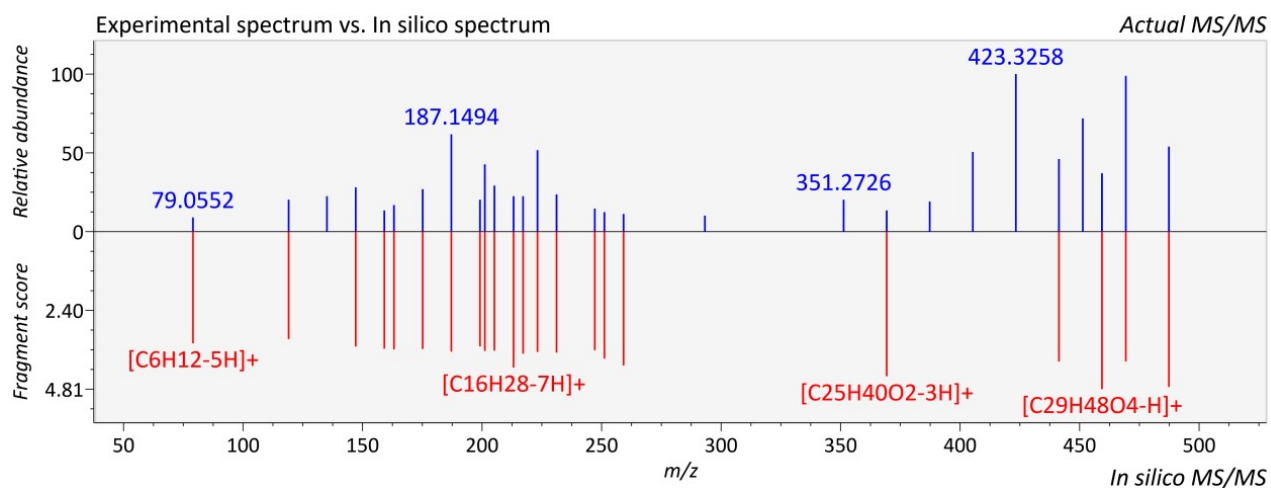

No.122 7-Hydroxyanthra[1,2-*d*]-1,3-dioxole-6,11-dione

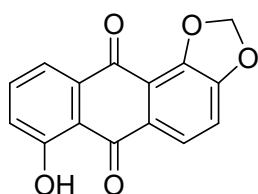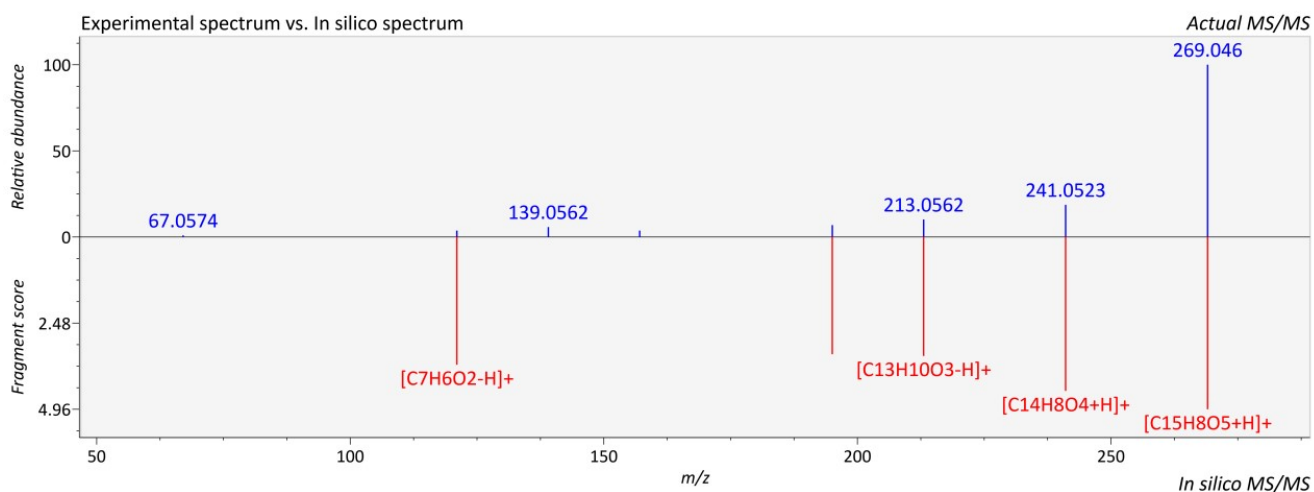

No.123 1,5-Dimethoxyl-2-methyl-anthraquinone

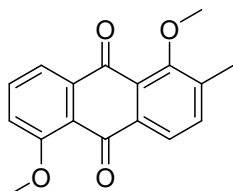

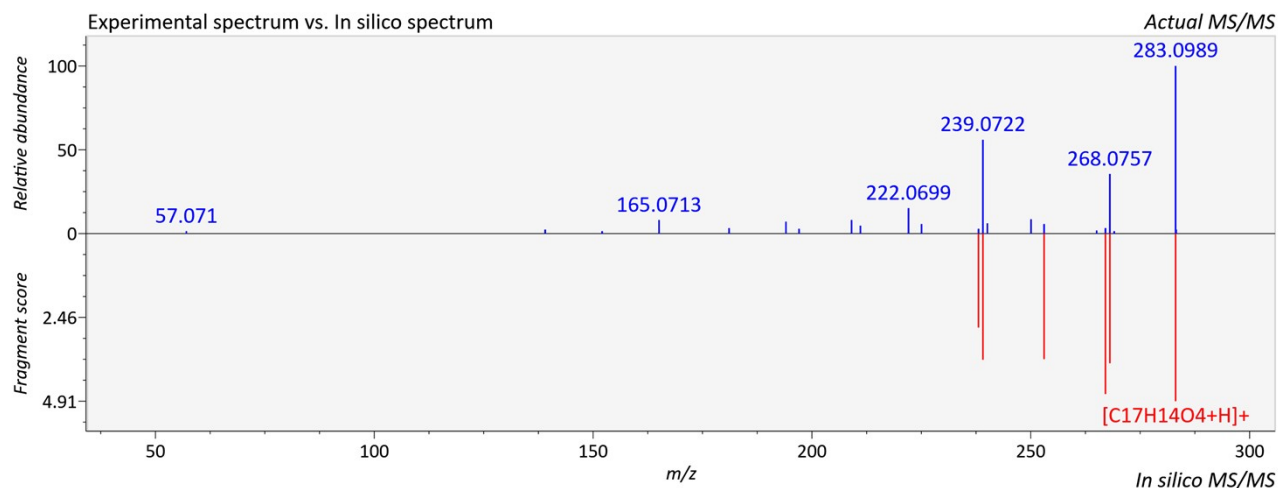

No.124 Morindaparvin A

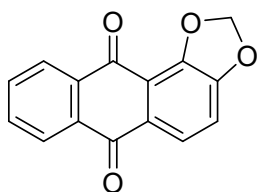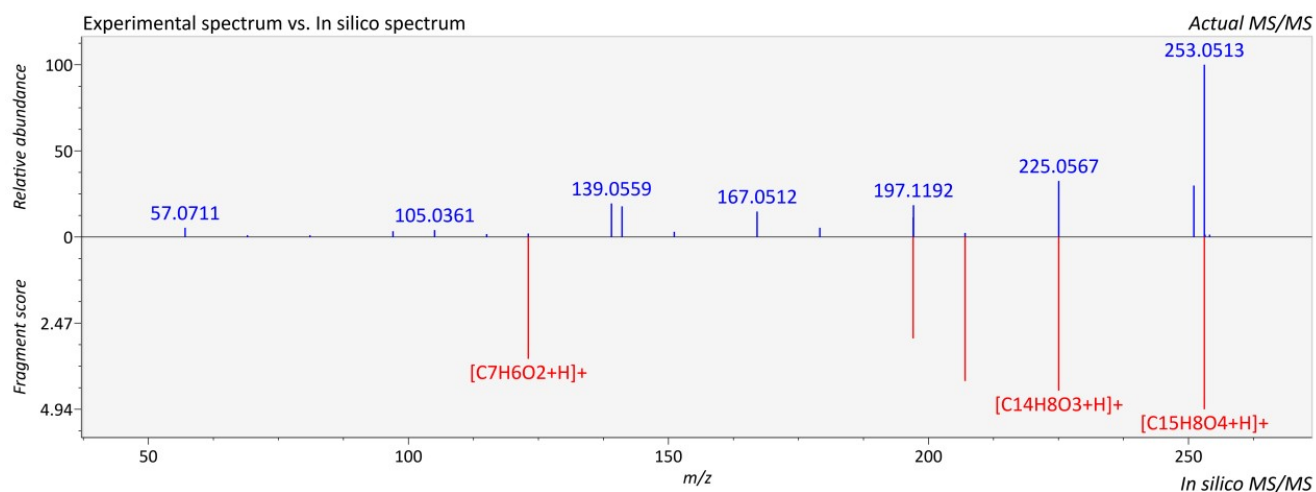

No.125  $\beta$ -Apo-13-carotenone 5,6-epoxide

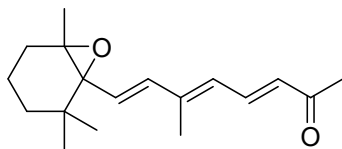

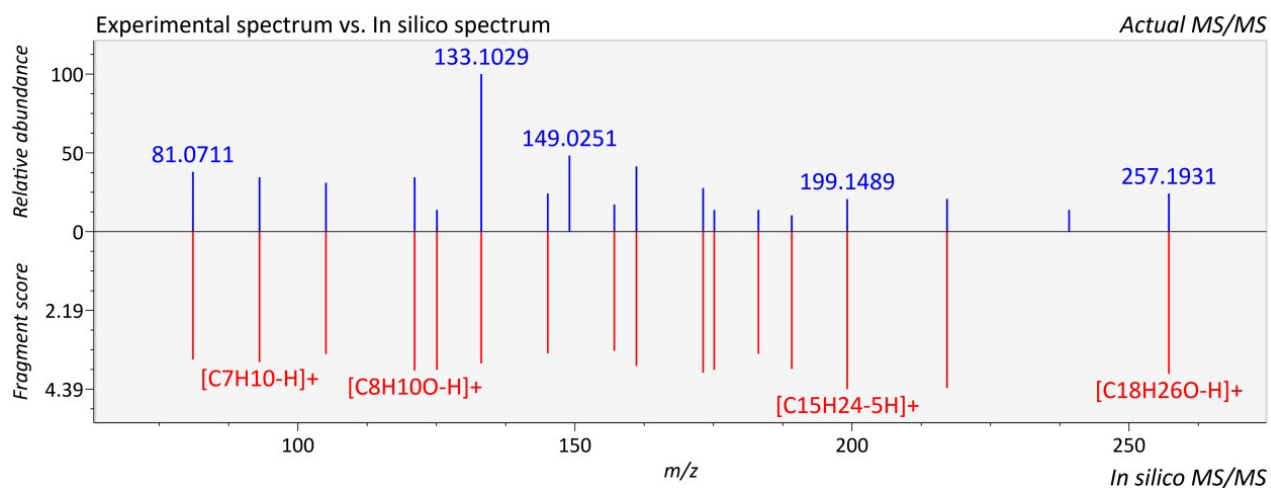

No.126 1,3-Dihydroxyl-5,6-dimethoxyl-2-methyl-anthraquinone

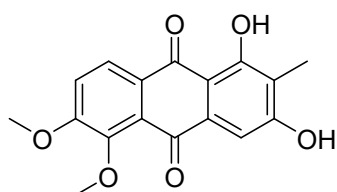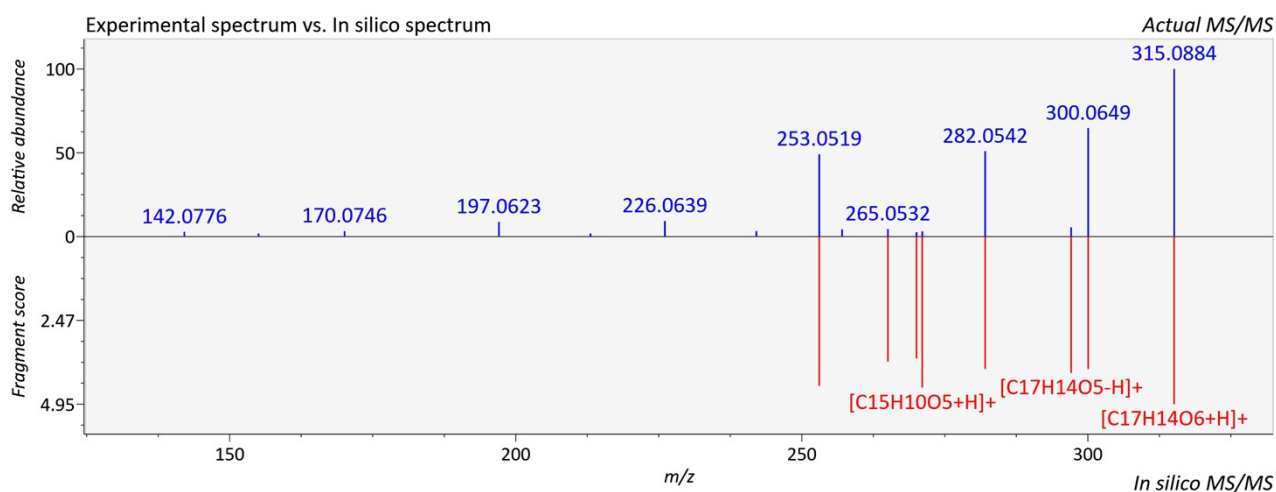

No.127 1-Methoxyl-2-methyl-anthraquinone

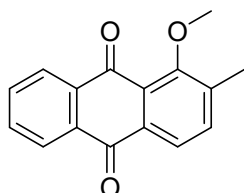

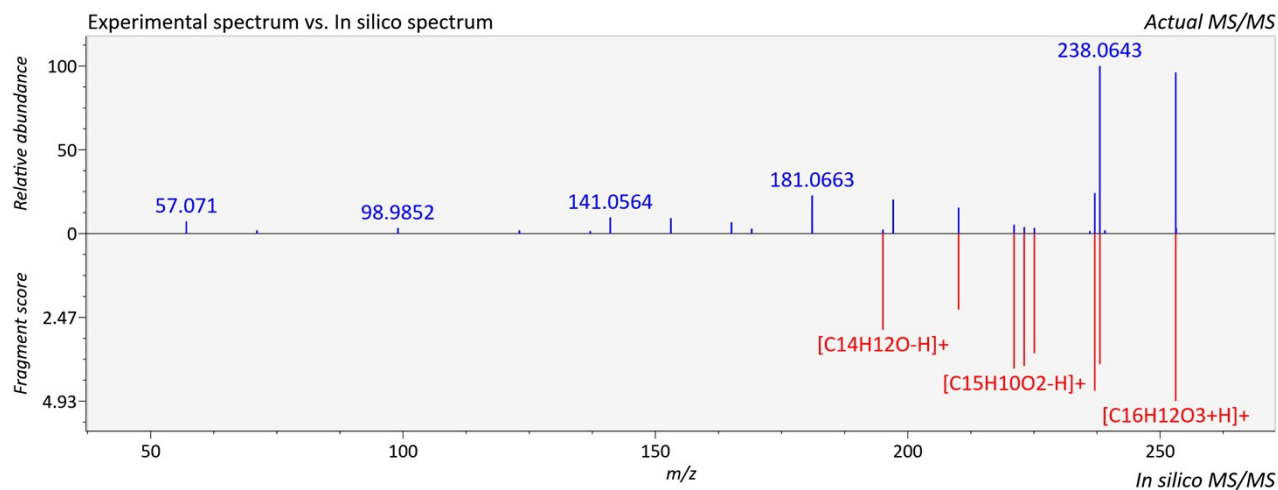

No.128 Rubiadin

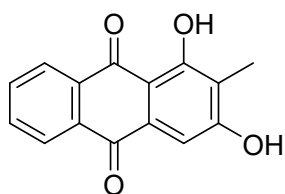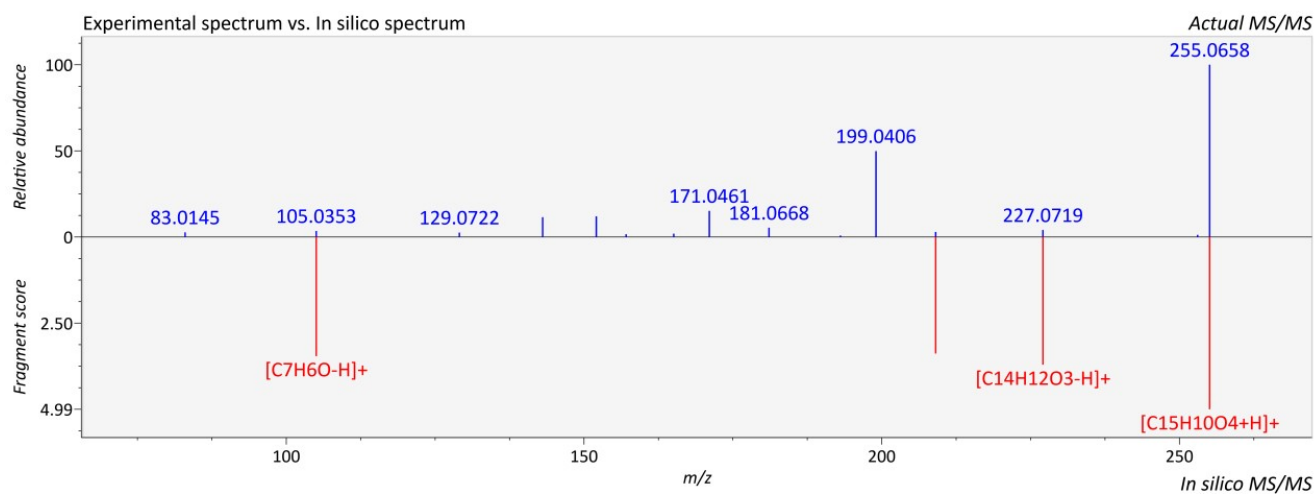

No.129 Retinoic acid

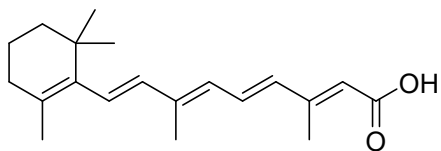

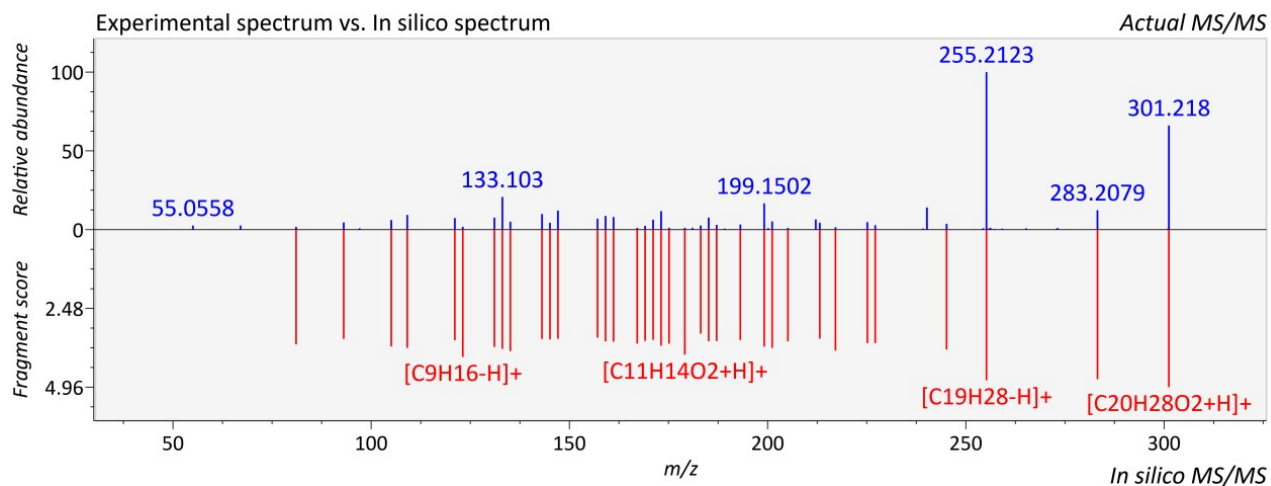

### No.130 Siameaquinones-A

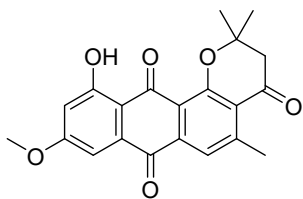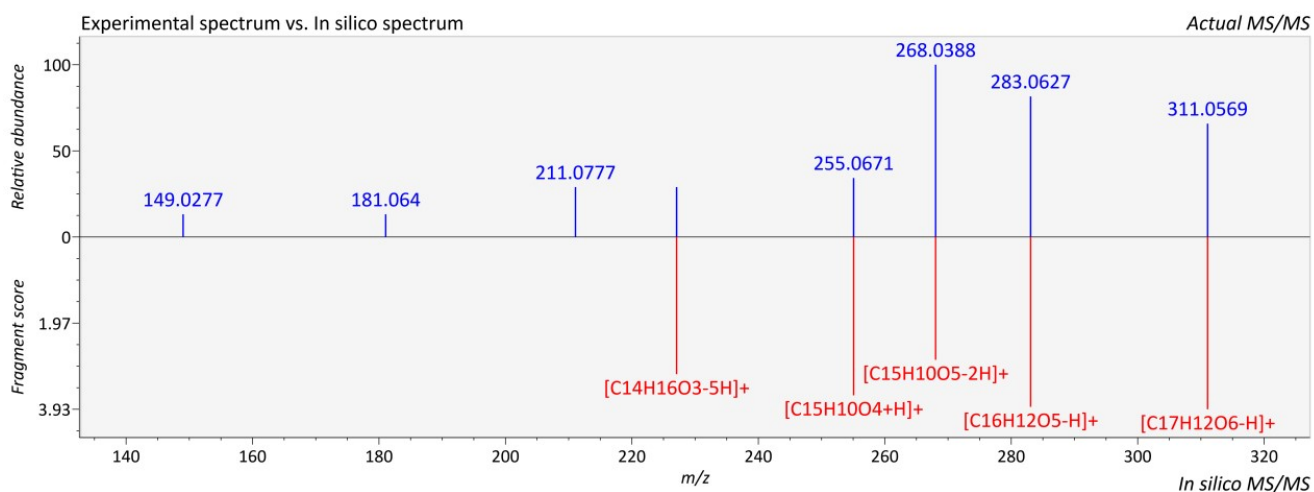

### No.131 Aspirin

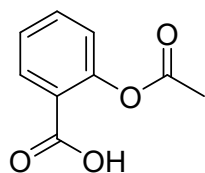

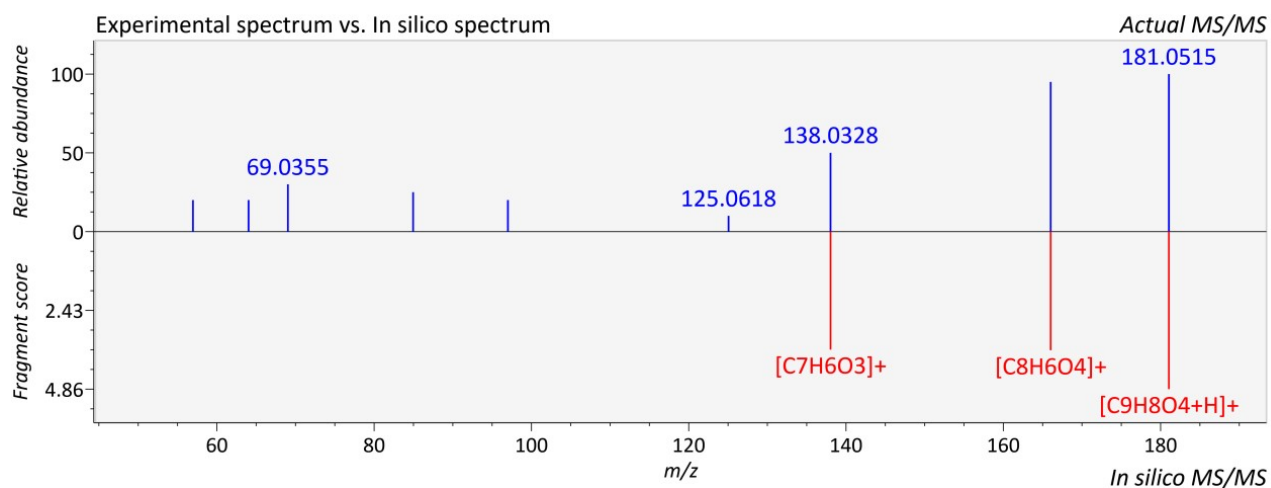

No.132 3-Hydroxyl-1-methoxyl-2-carboxy-anthraquinone

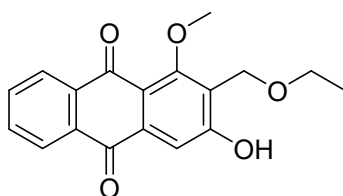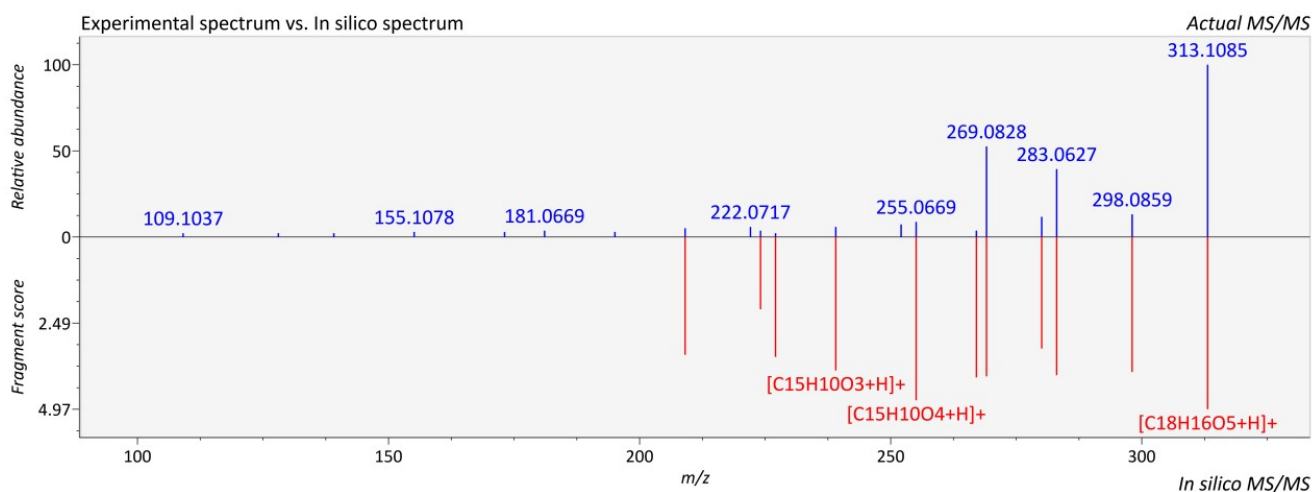

No.133 Digitolutein-5-hydroxyl

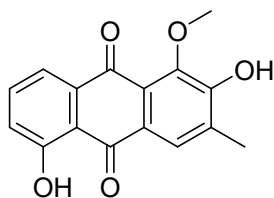

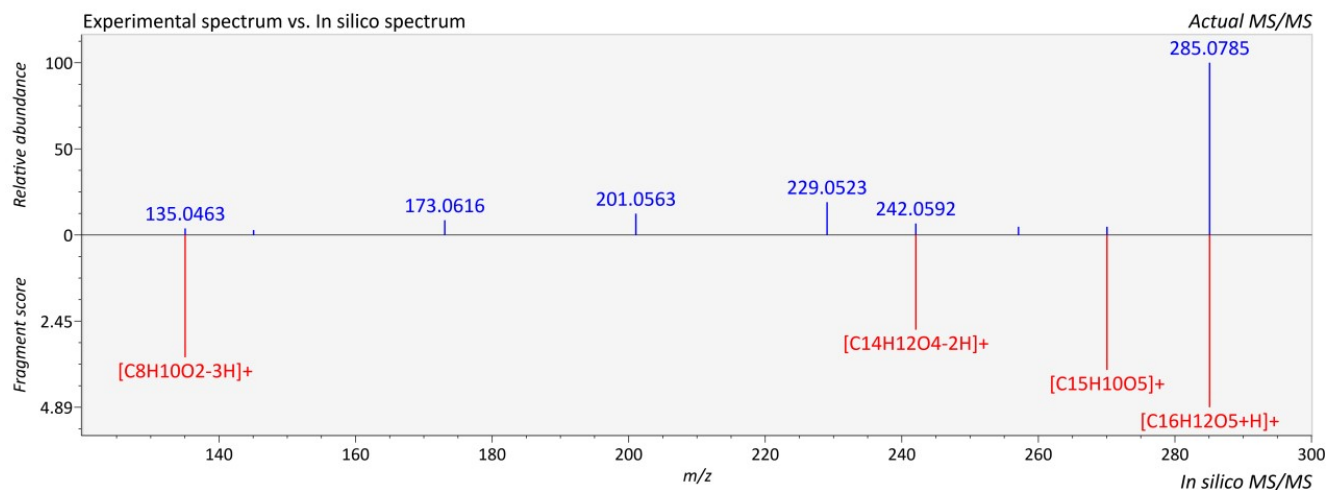

No.134 1-Hydroxyl-2-ethoxy-anthraquinone

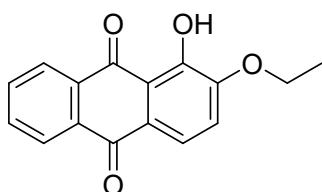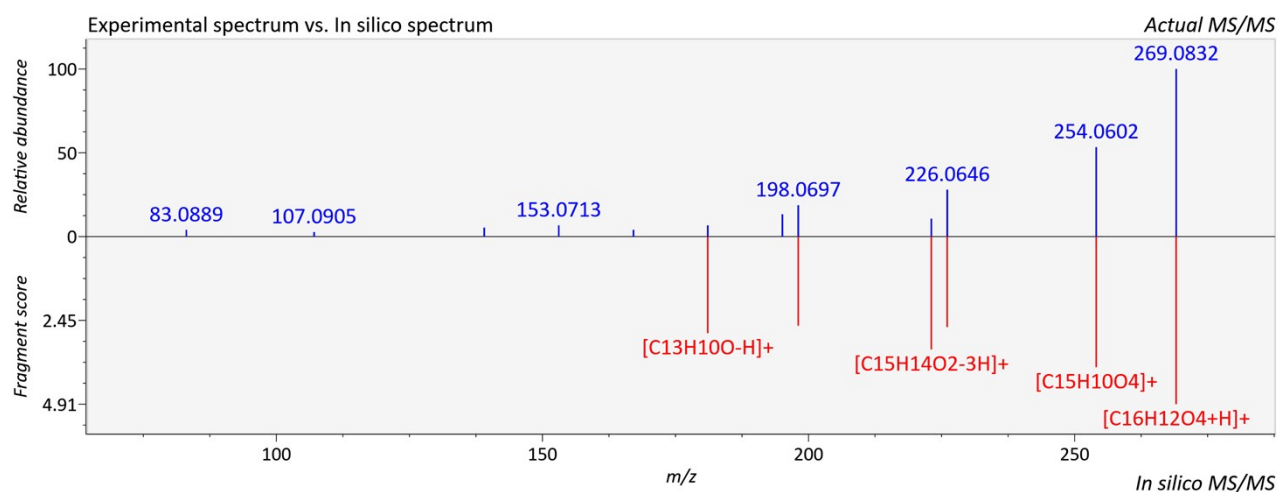

No.135 2-Formylanthraquinone

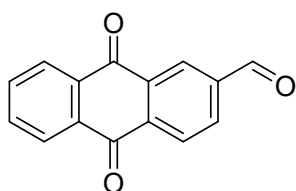

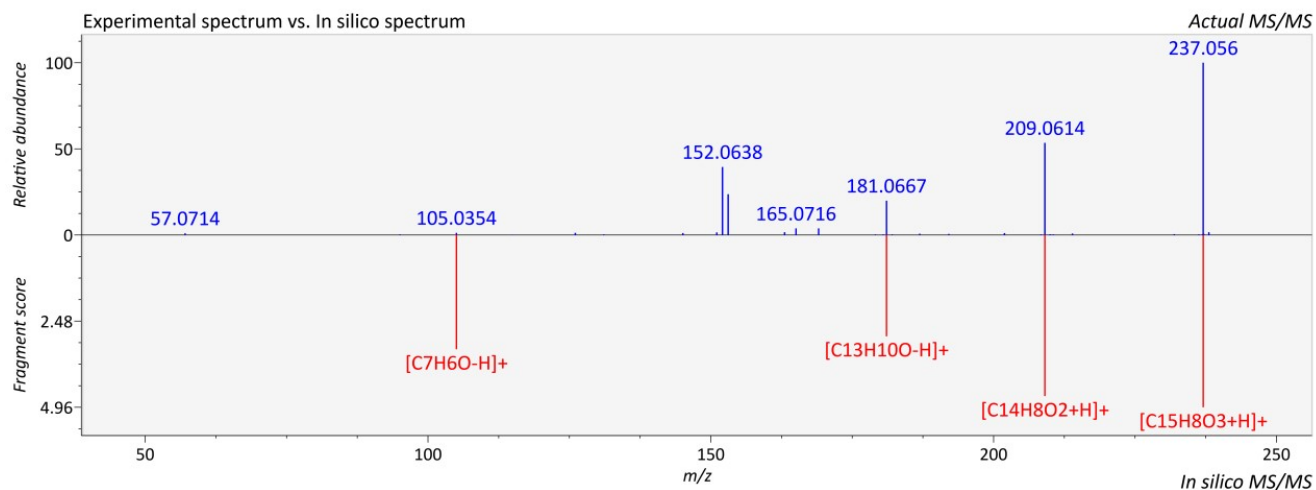

No.136 4-Oxo-β-ionylideneacetaldehyde

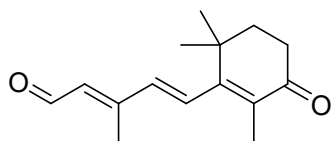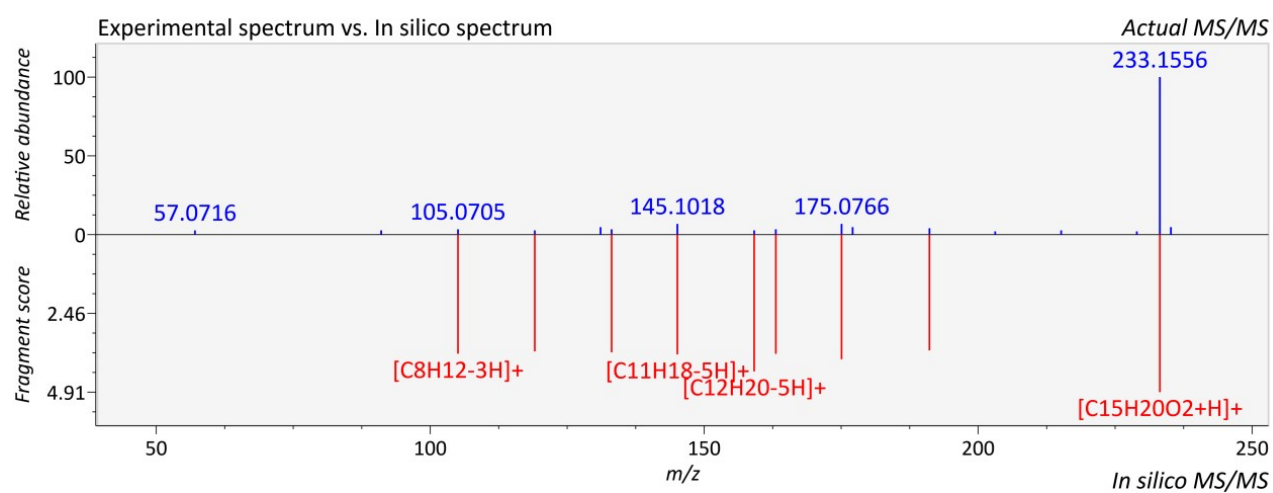

No.137 1,3-Dihydroxyl-5-methoxyl-2,6-dismethoxymethyl-anthraquinone

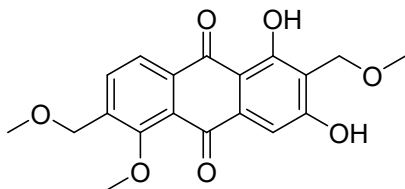

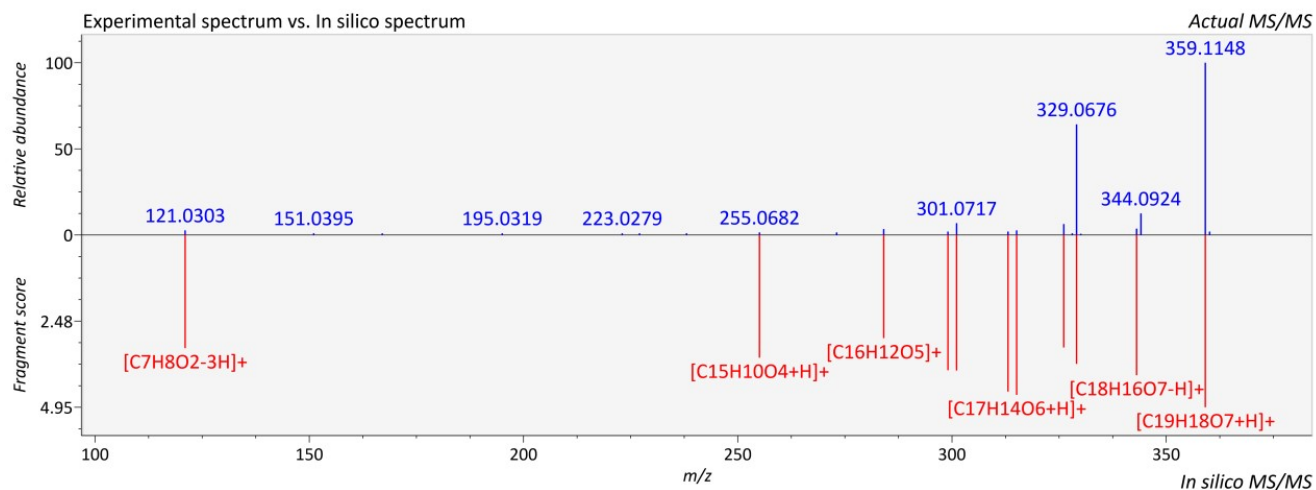

No.138 7-Methoxyanthra[1,2-*d*]-1,3-dioxole-6,11-dione

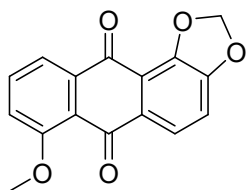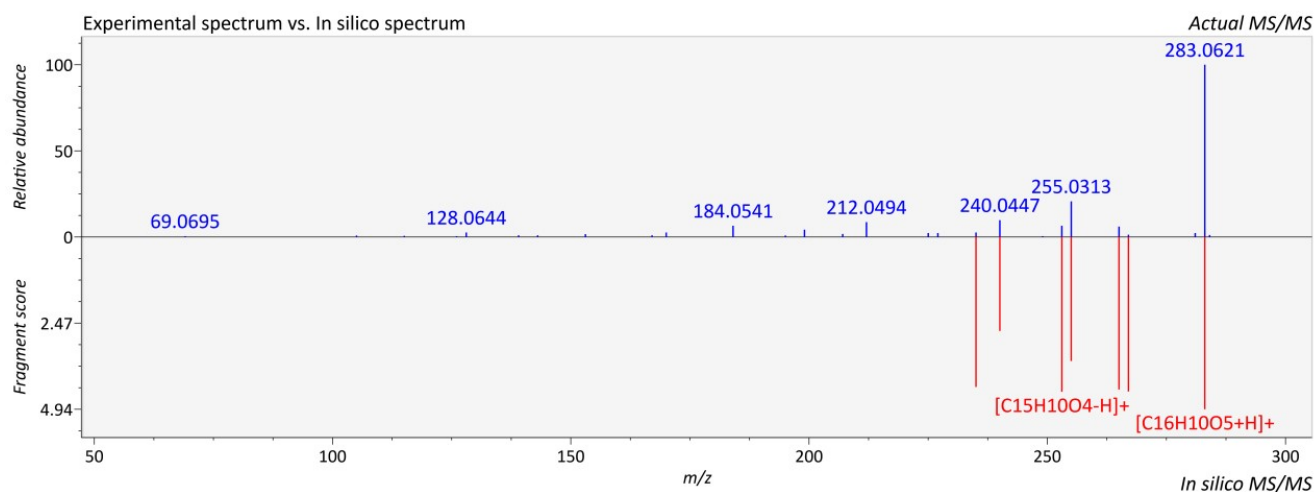

No.139 Chrysophanol-1,8-dimethoxyl

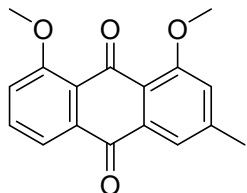

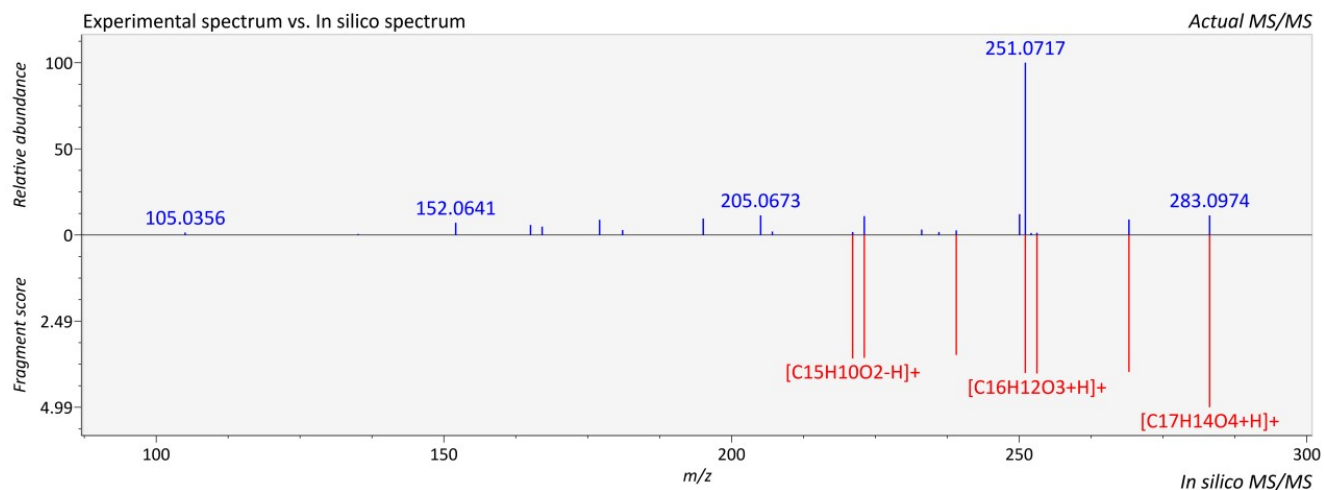

No.140  $\beta$ -Ionylideneacetaldehyde

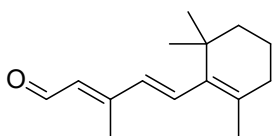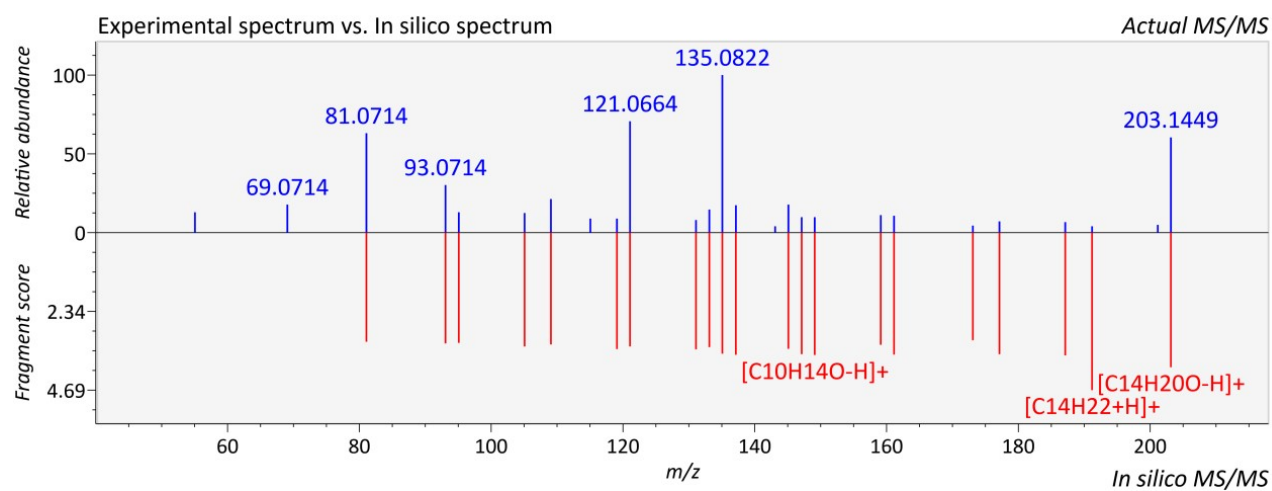

No.141 Stearidonic acid

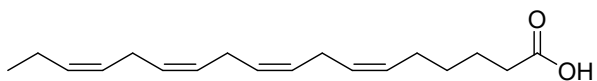

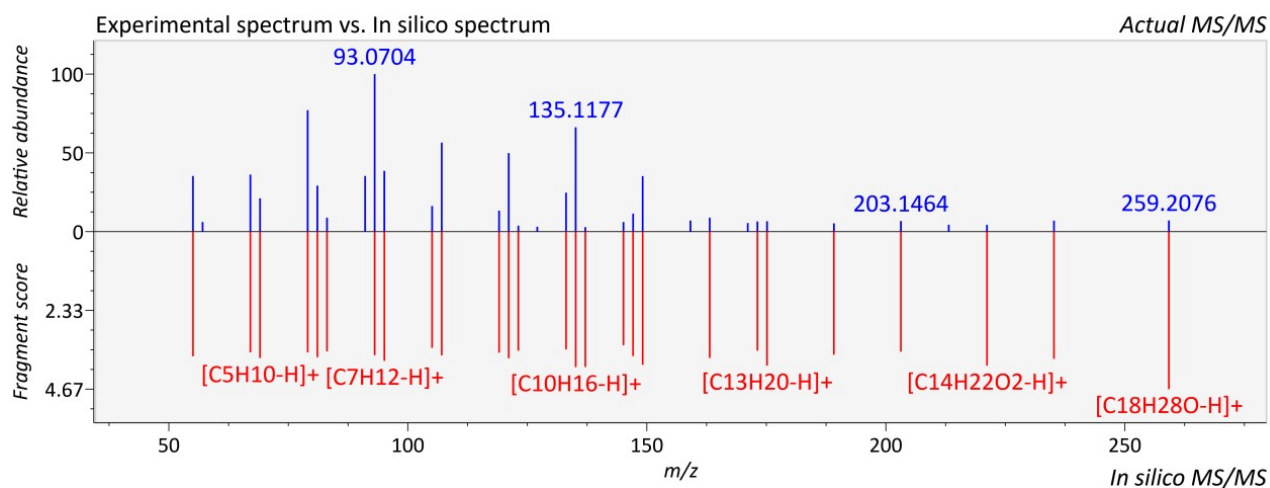

No.142 4-(2,2-Dimethyl-6-methylenecyclohexylidene)-2-butanone

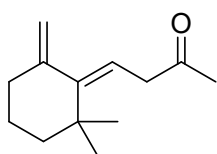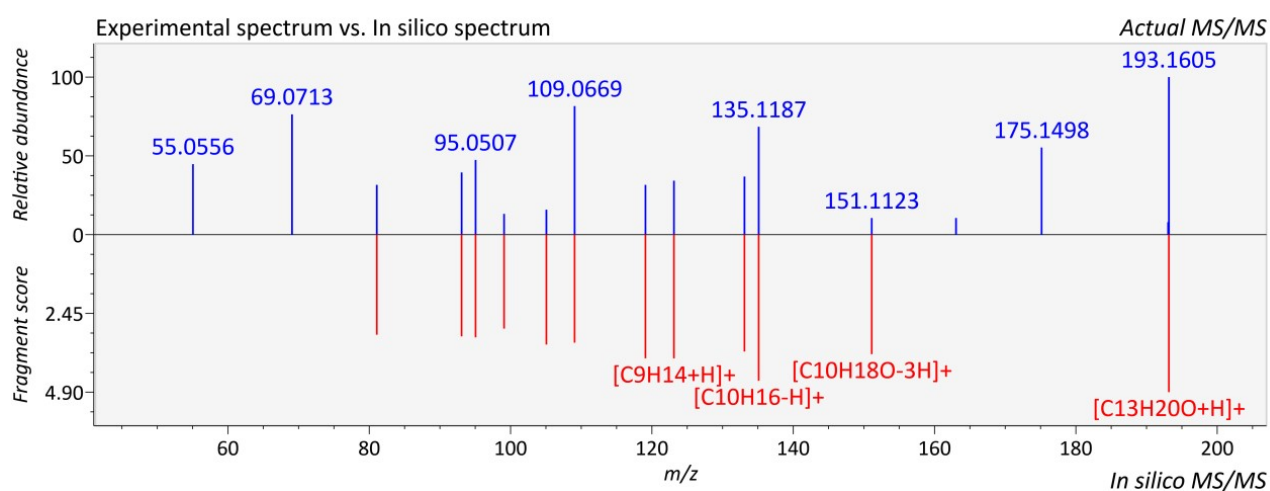

No.143 1-Hydroxy-2-methylantraquinone

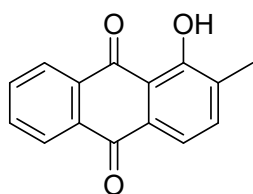

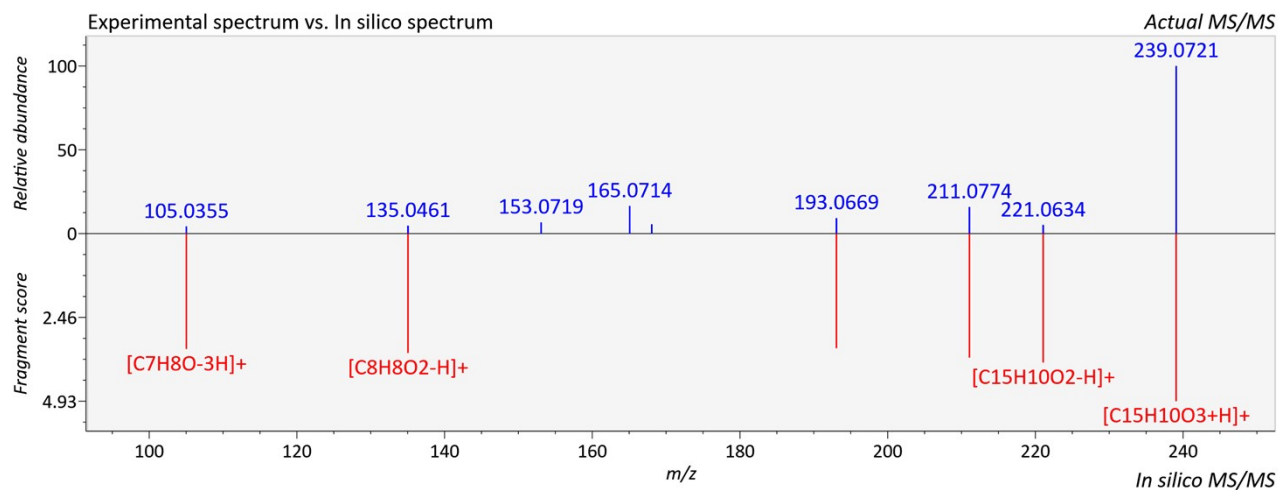

No.144 Damnacanthol

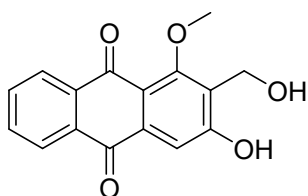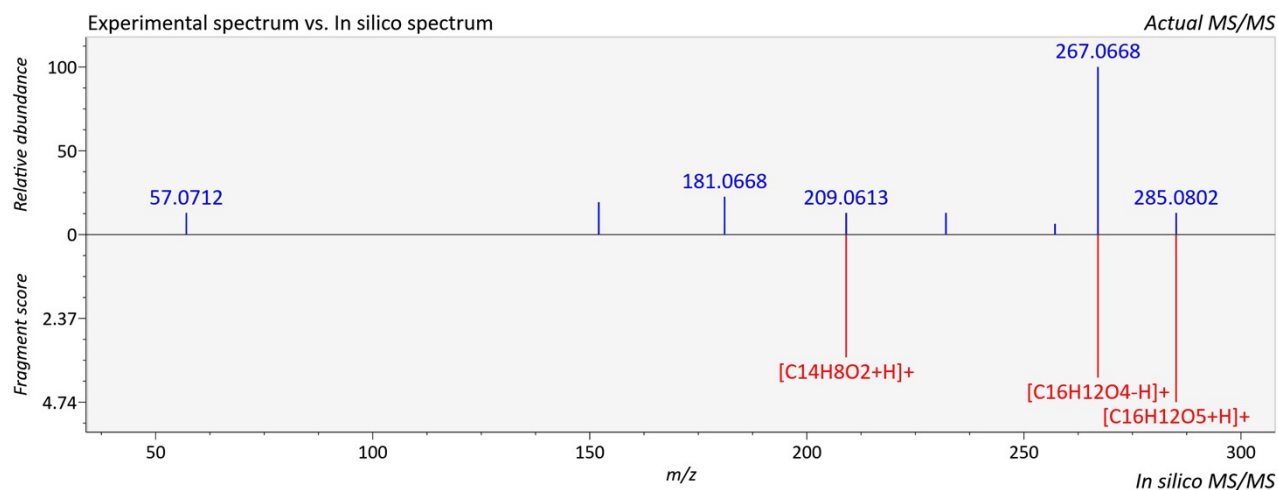

No.145 5,6-Epoxyretinal

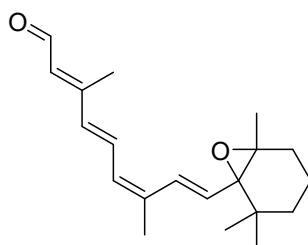

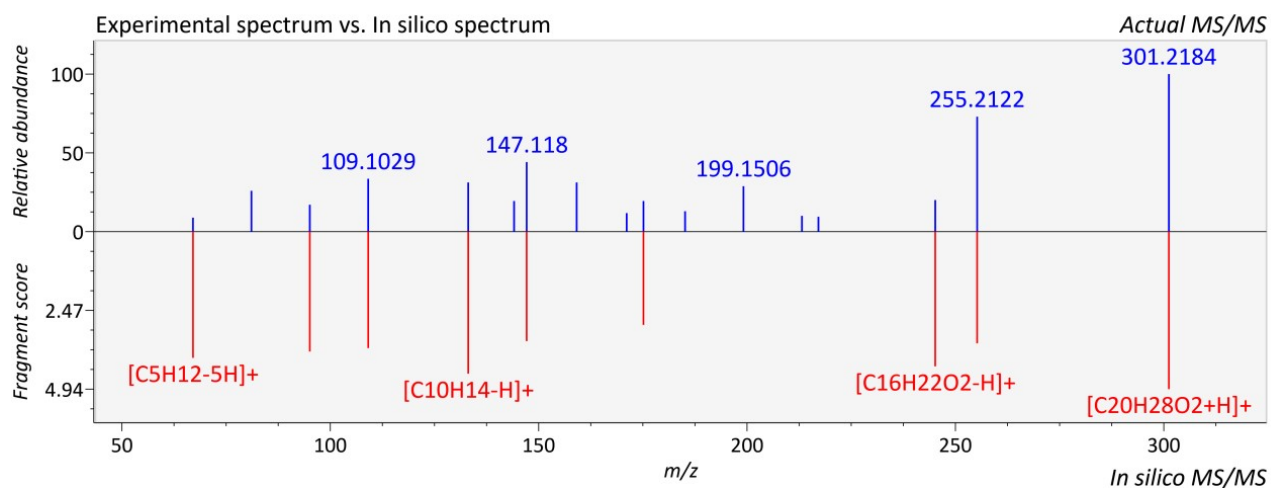

No.146 Retinal

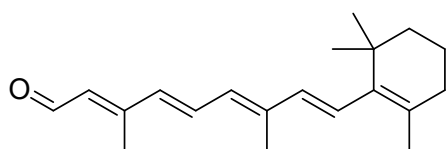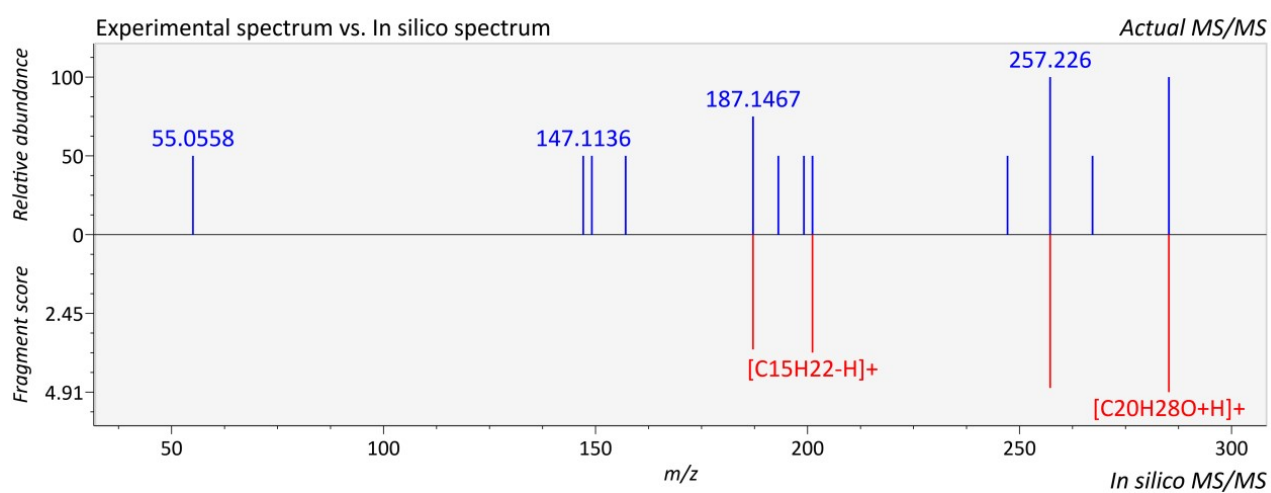

No.147 Timnodonic acid

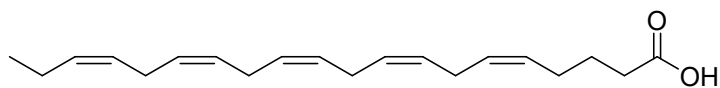

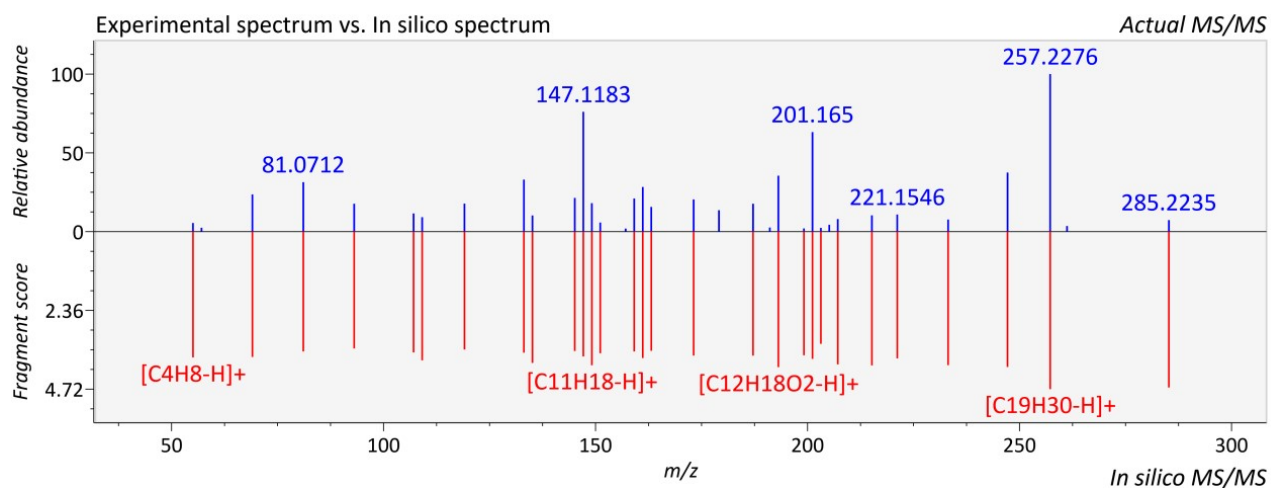

No.148 Linoleic acid

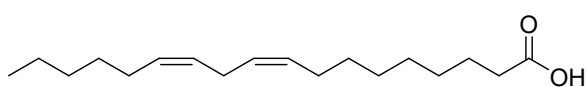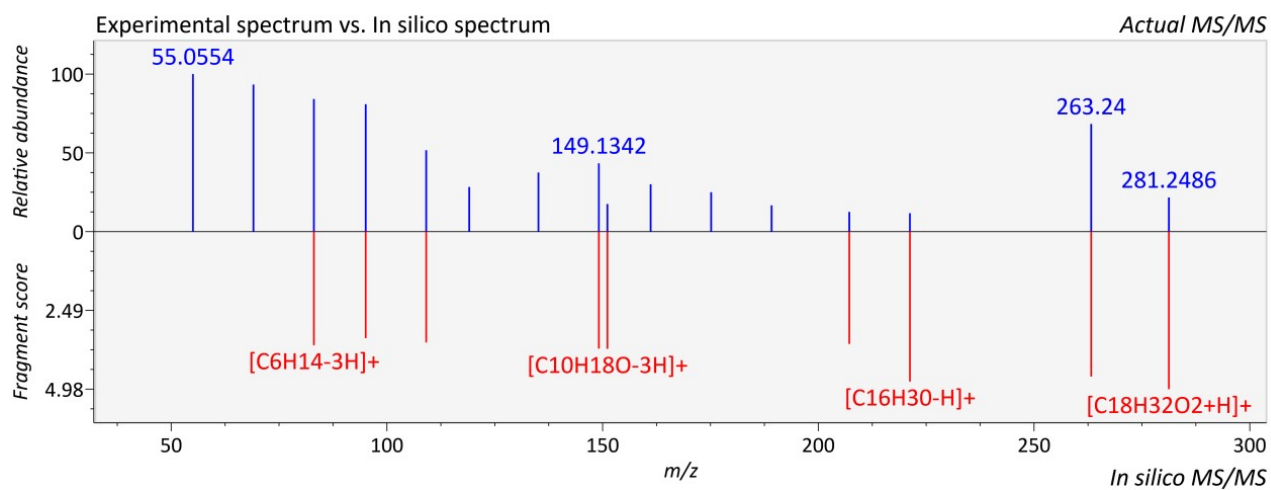

No.149 13-KODE

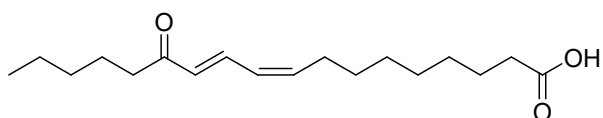

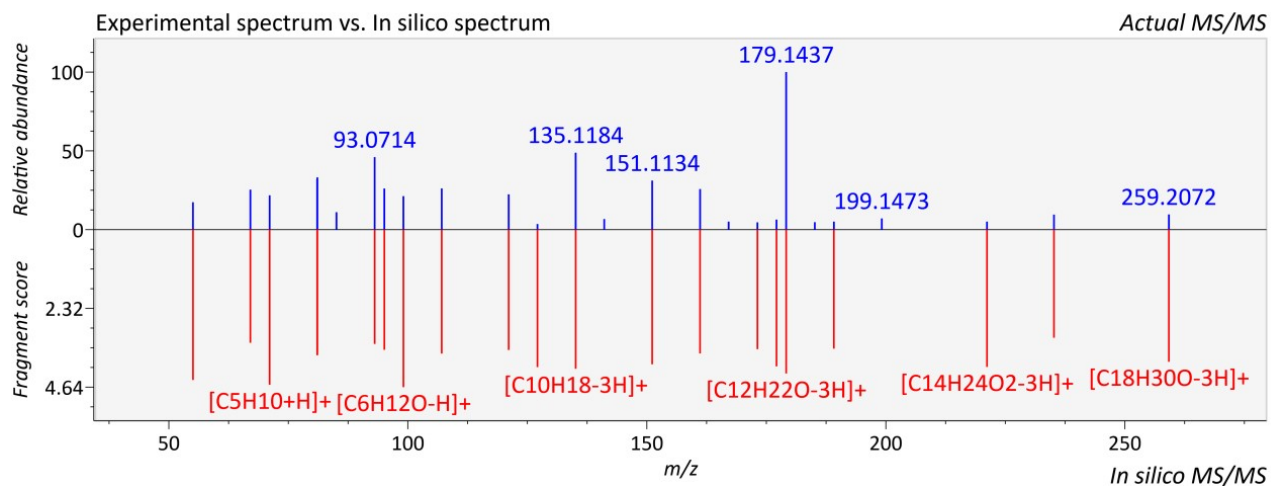

No.150 Phycion

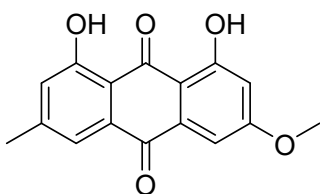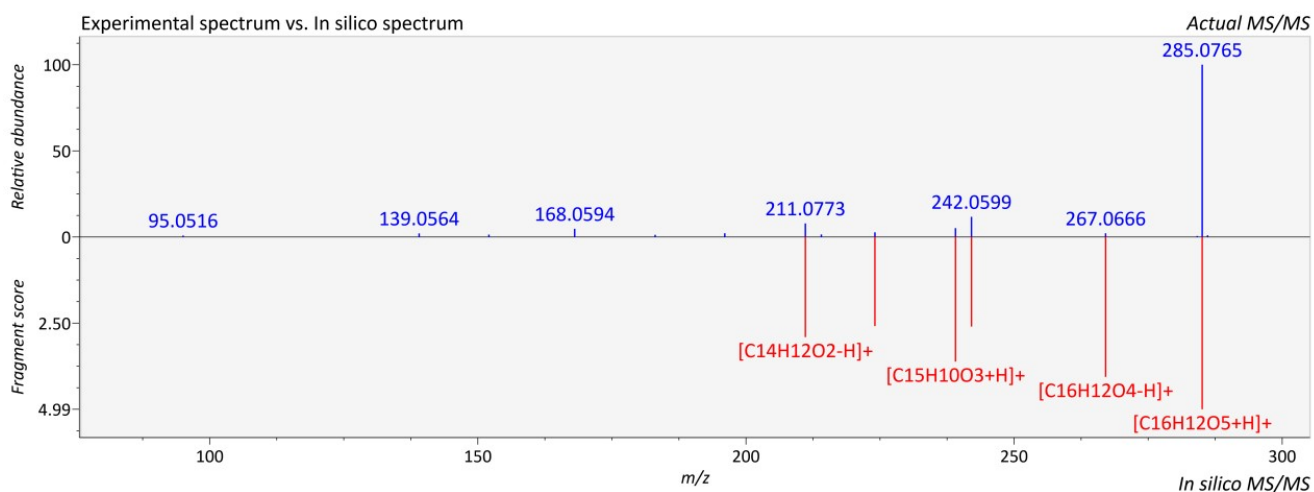

No.151 1-Hydroxyl-8-methoxyl-2-methyl-anthraquinone

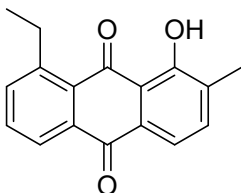

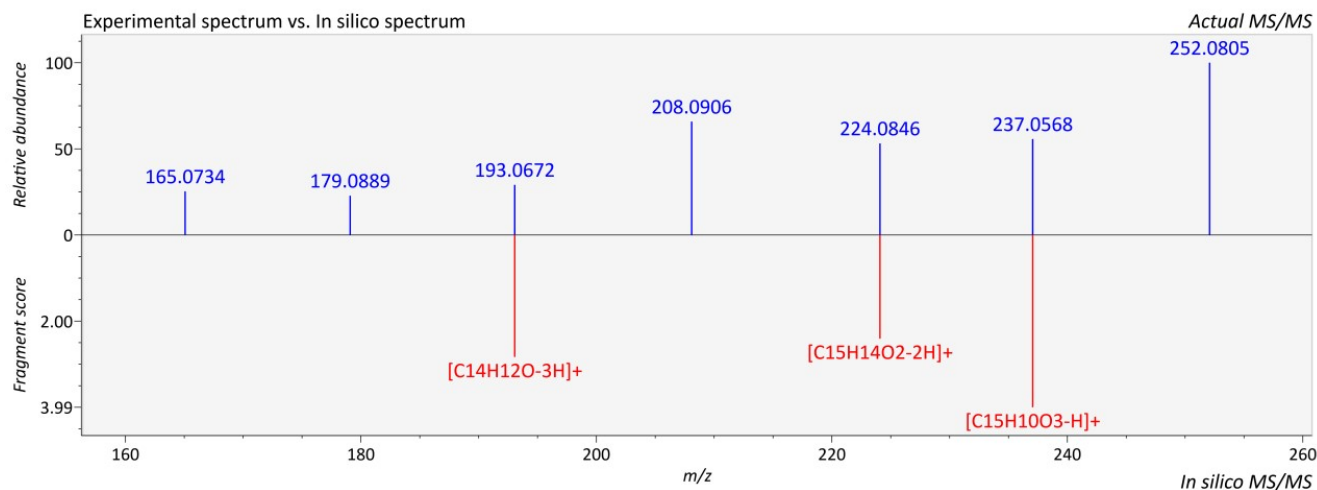

No.152 13-HOTE

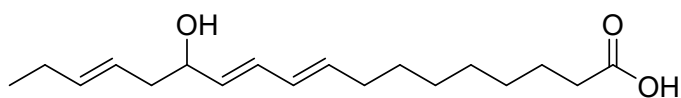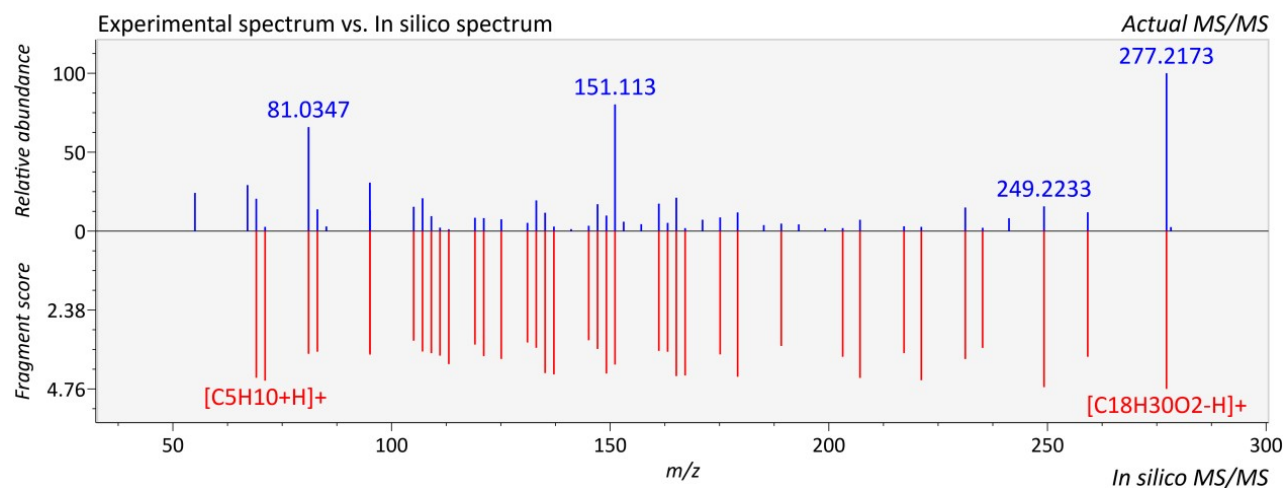

No.153 Phthalandione

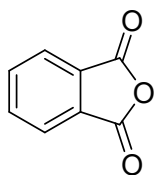

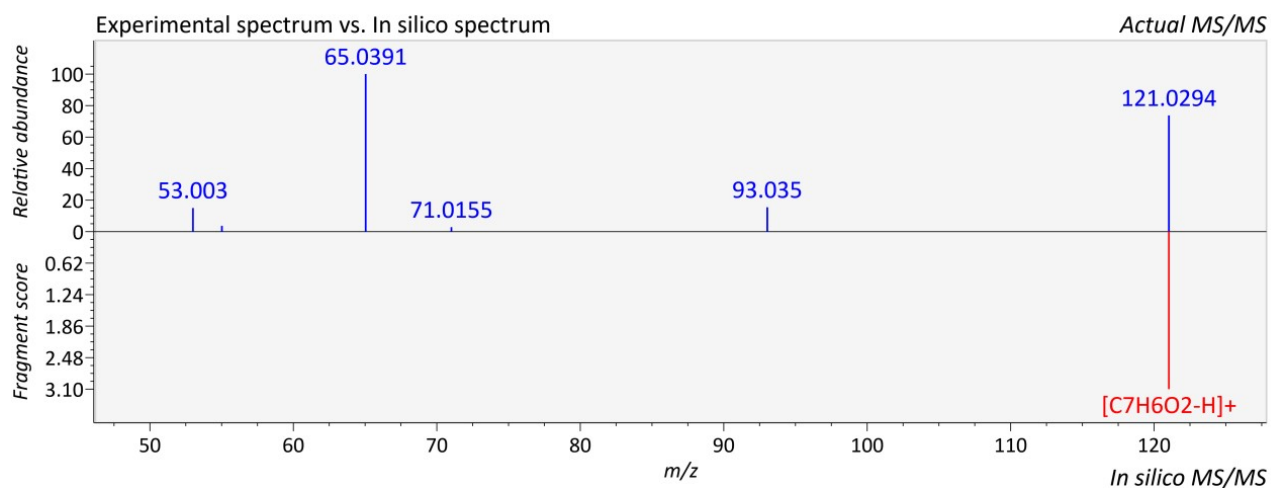

No.154 Obtusin-6-hydroxyl-2-methoxyl

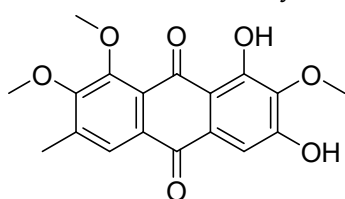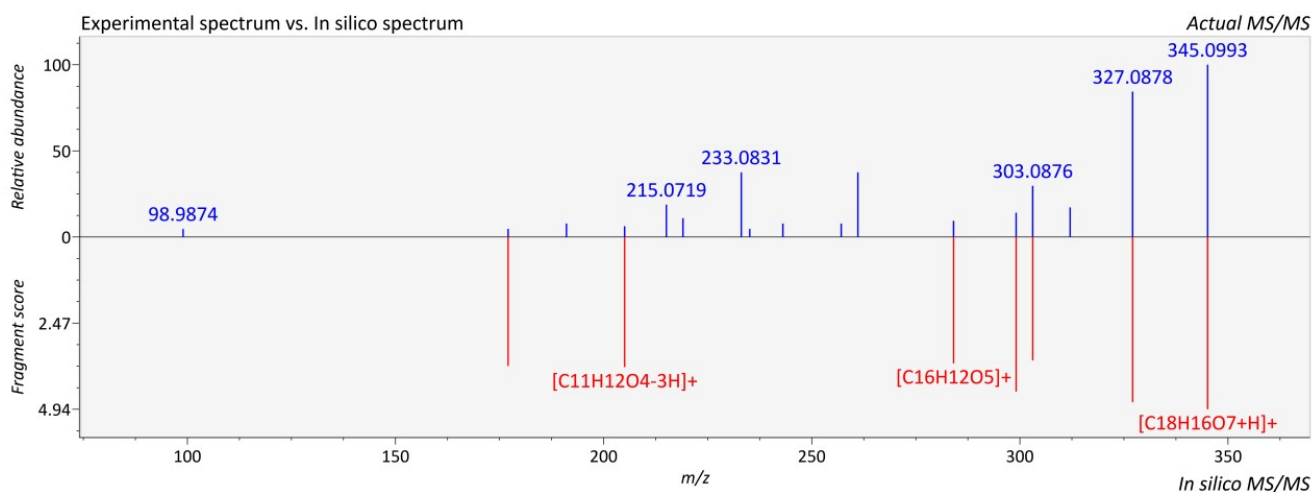

No.155 Barbinervic acid

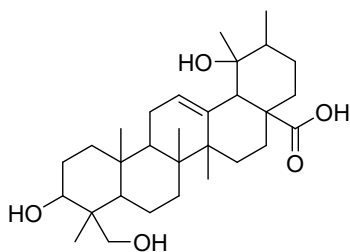

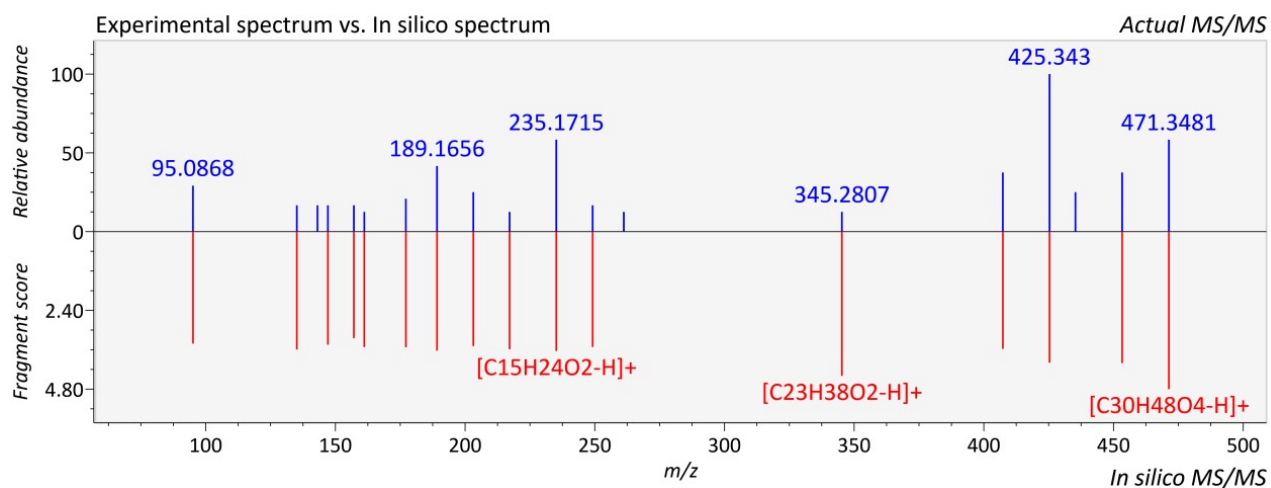

No.156 Aurantio-obtusin-1-hydroxyl

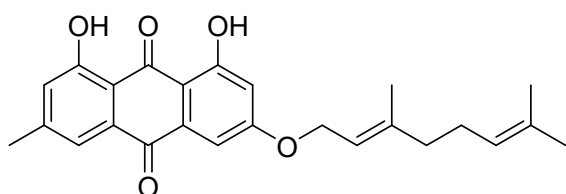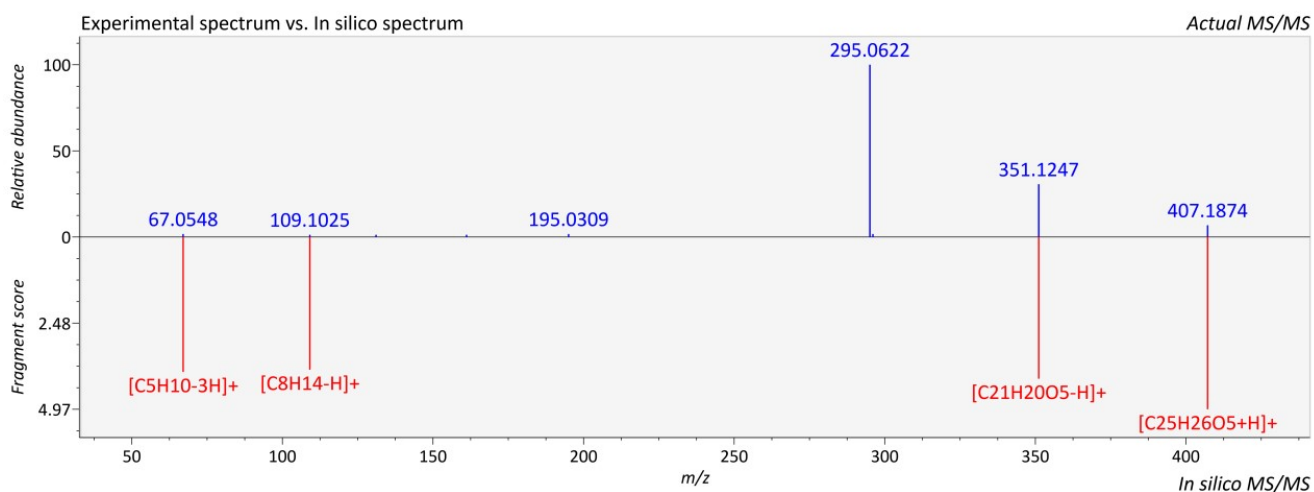

No.157 5,7-Dihydroxychromone

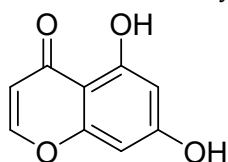

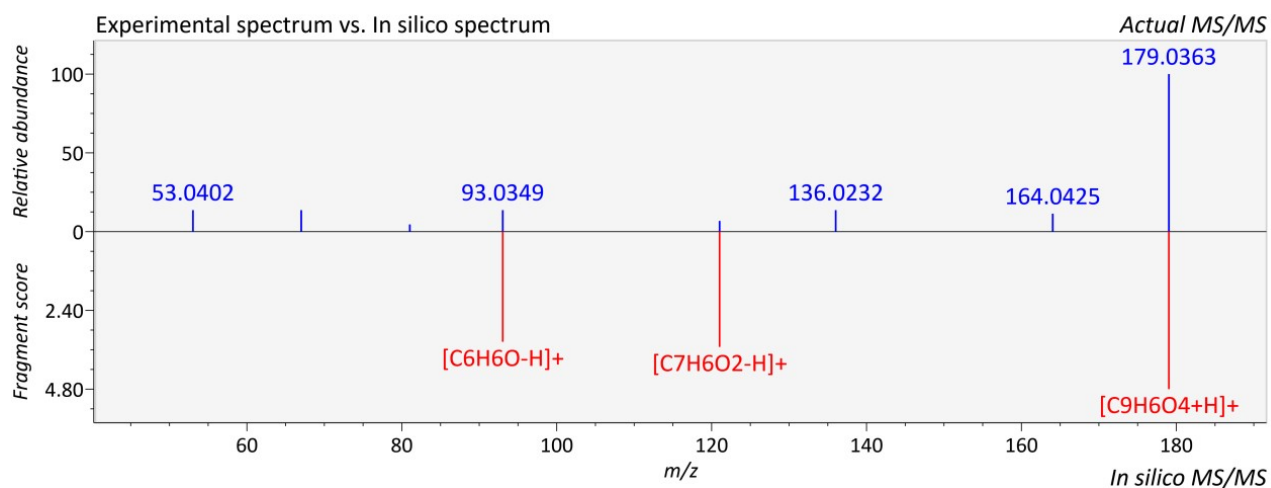

No.158 Dihomo- $\gamma$ -linolenic acid

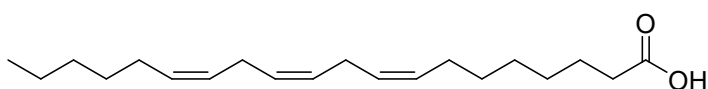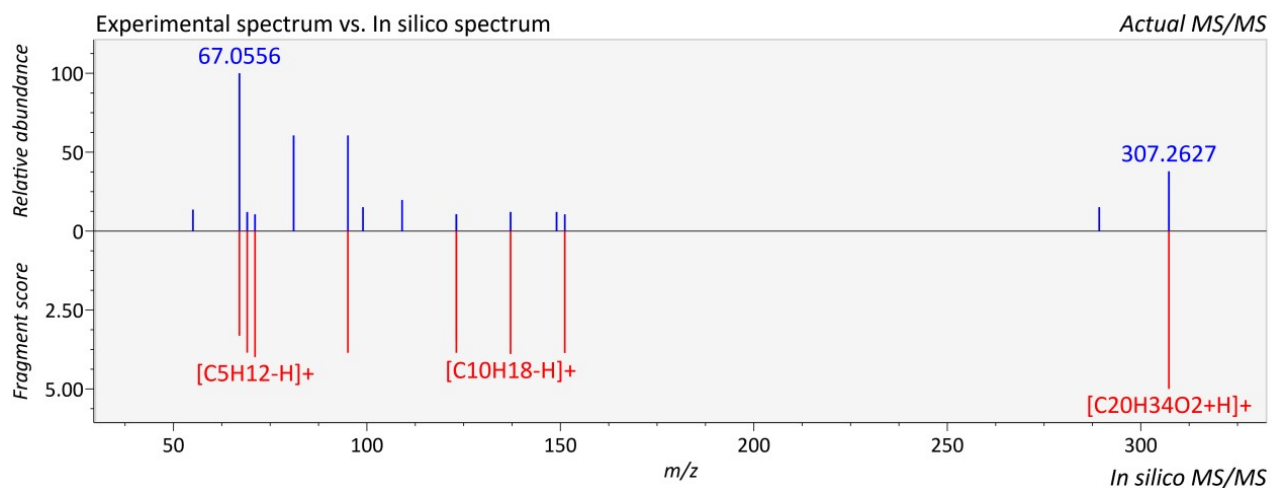

No.159 Betulin

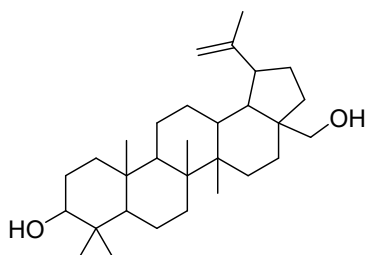

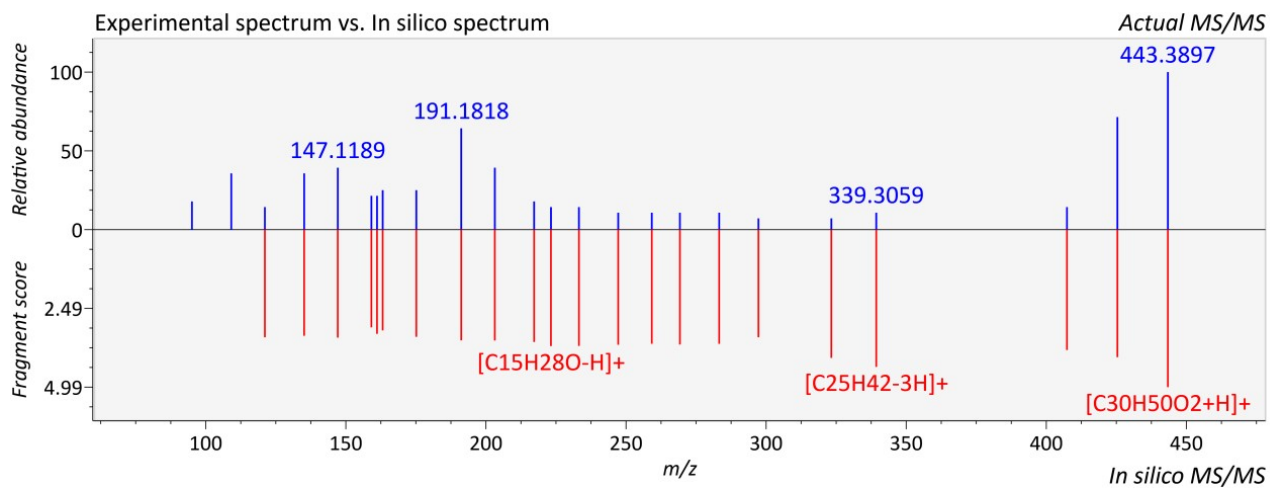

No.160 3-hydroxyl-1,2-dimethyl-anthraquinone

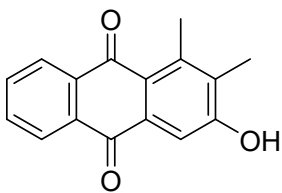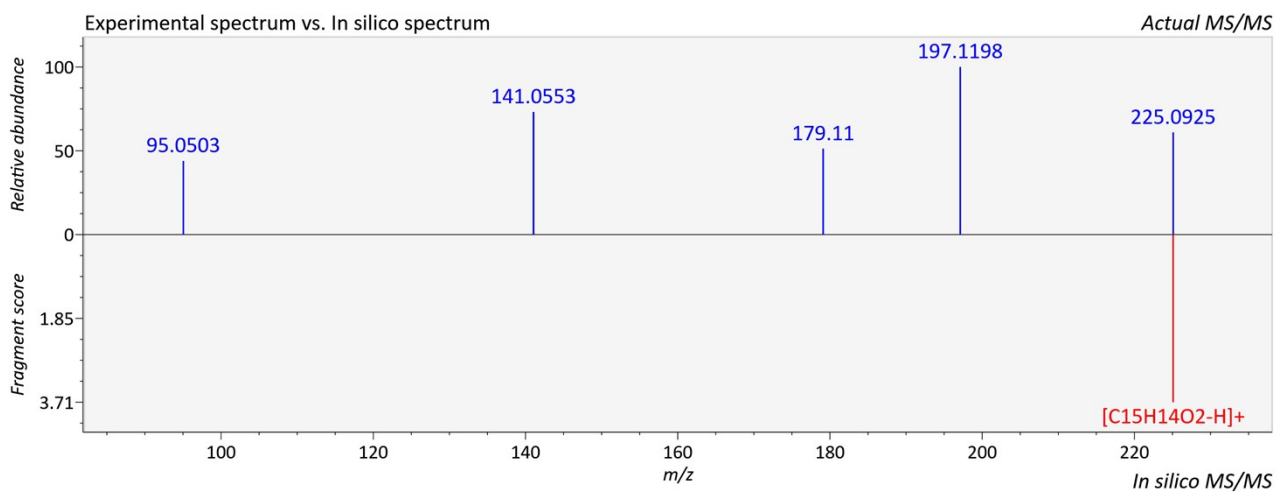

No.161 Oleanolic acid

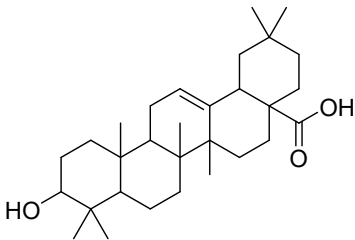

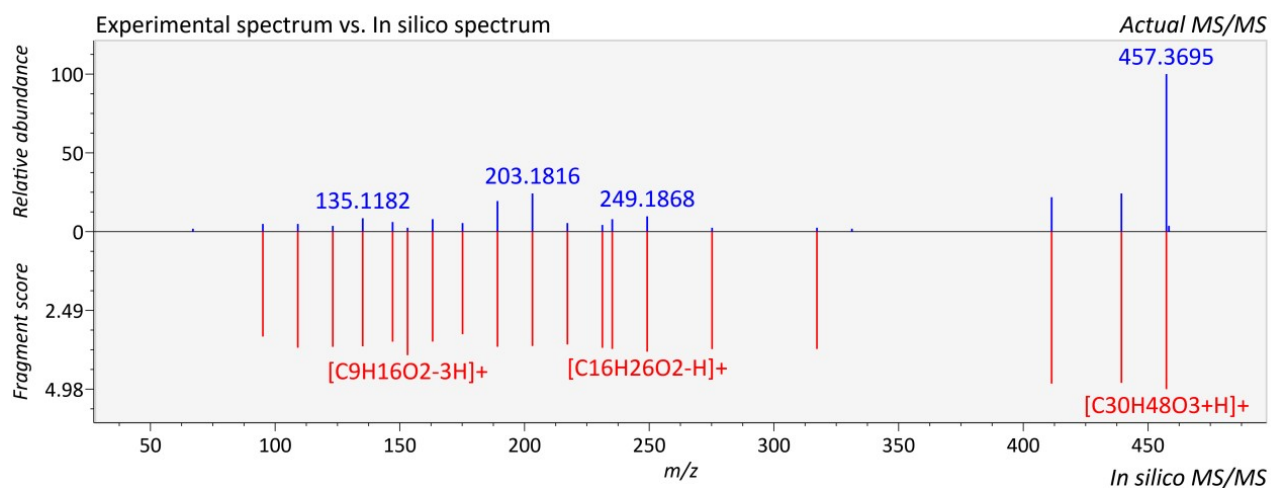

No.162  $\beta$ -Apo-12'-Carotenal

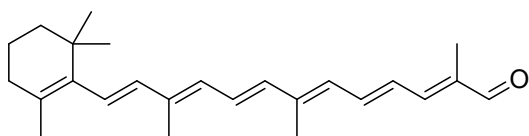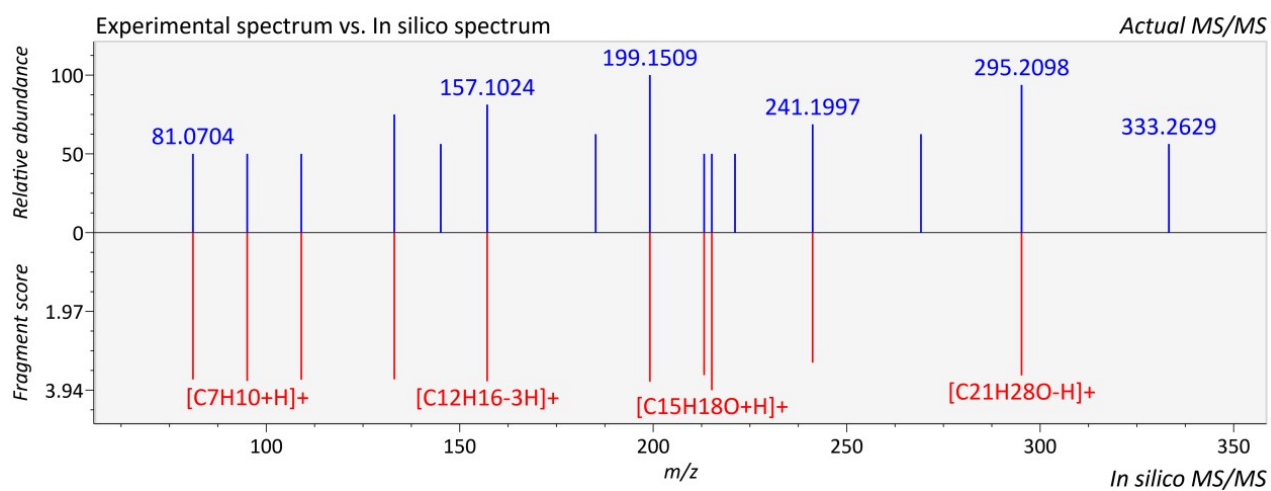

No.163 Ursolic acid

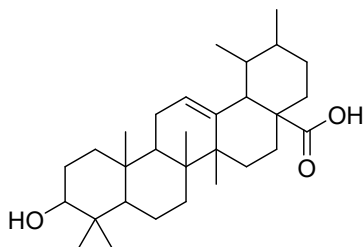

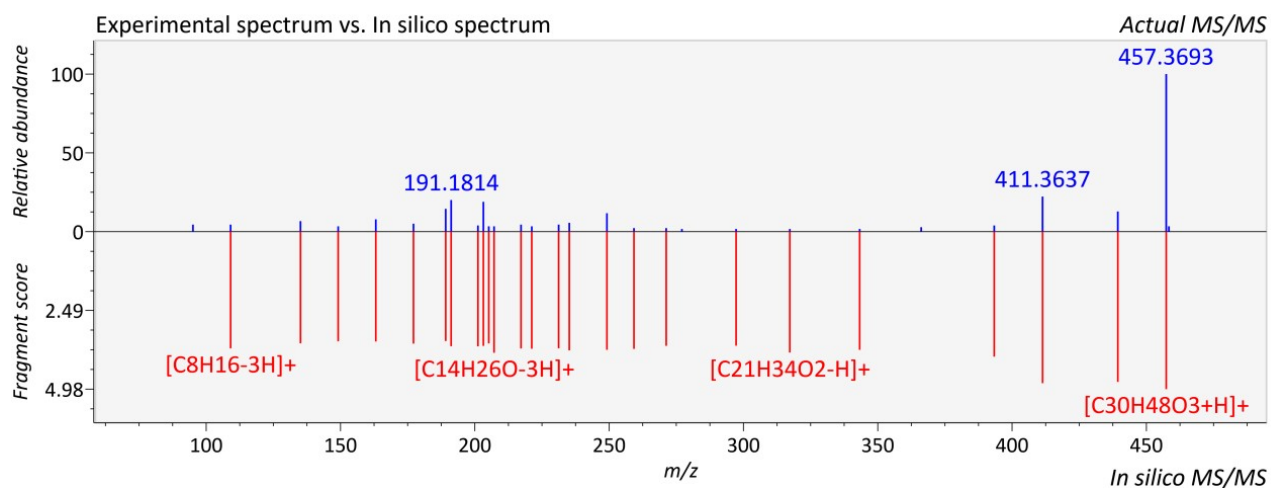

No.164 Linolenic acid

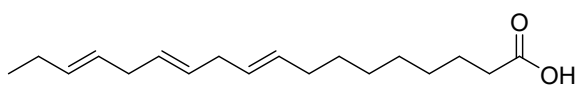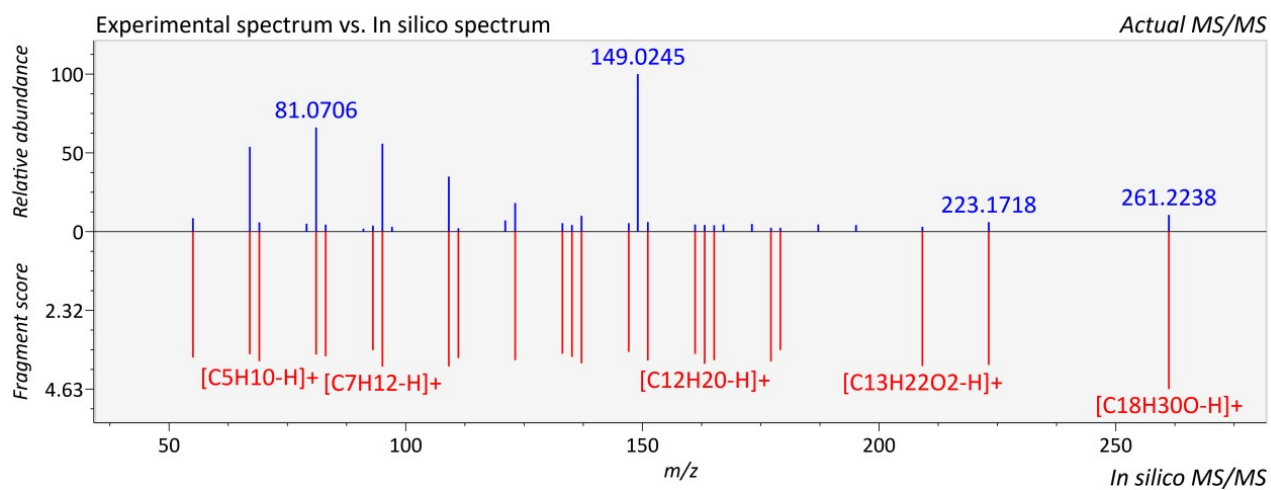

No.165  $\beta$ -Apo-13-carotenone

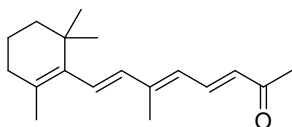

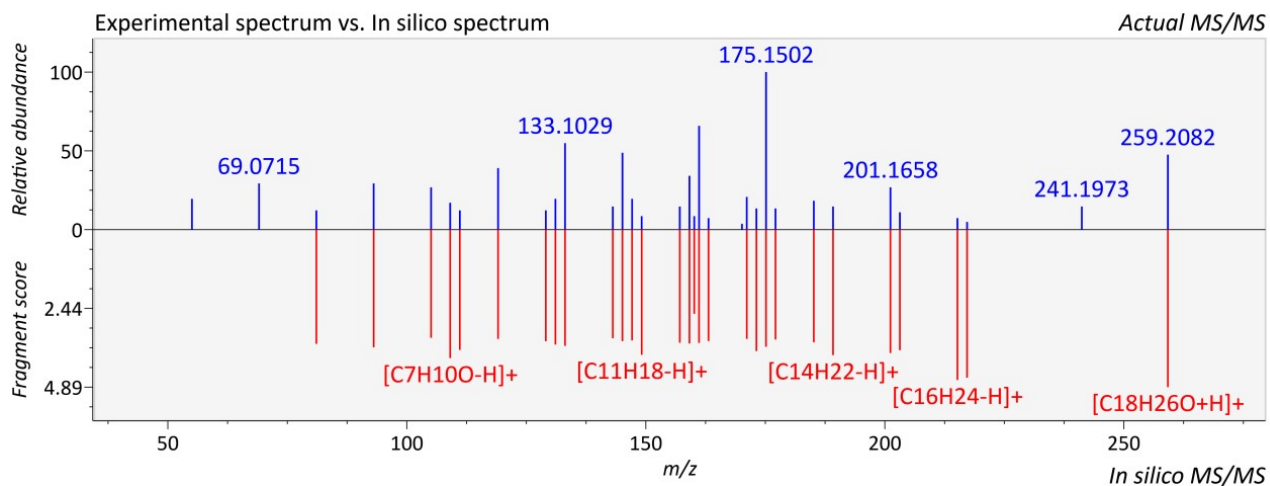

No.166 (3 $\beta$ )-3-(Acetyloxy)-19-hydroxyurs-12-en-28-oic acid

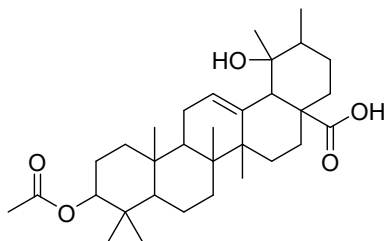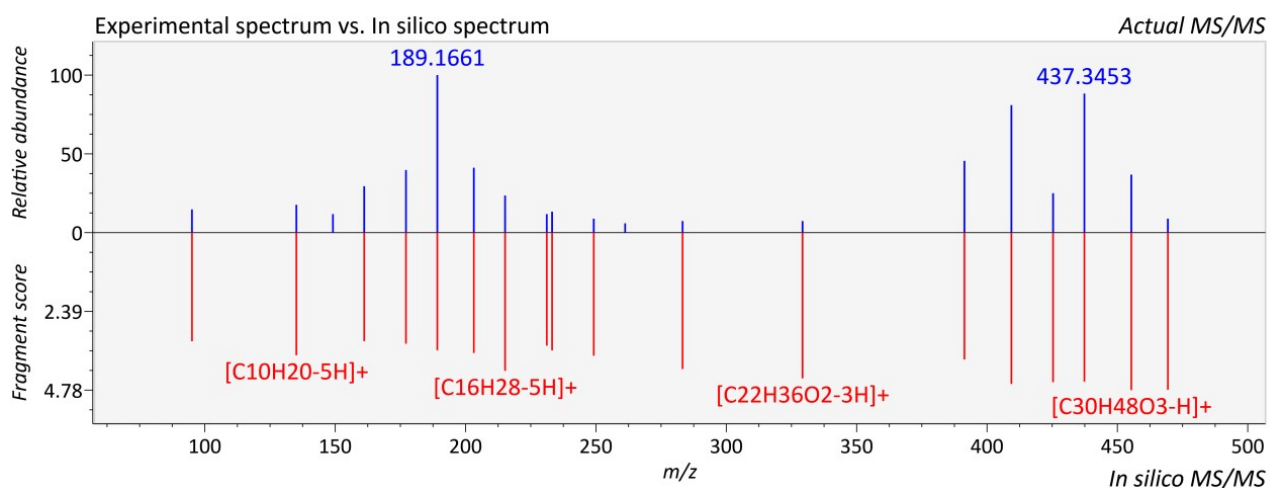

No.167  $\beta$ -Carotenone

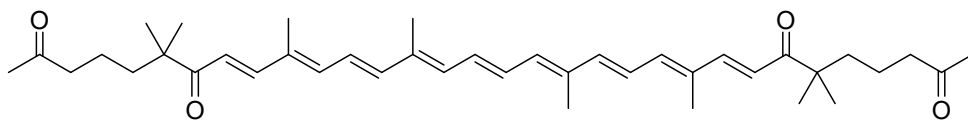

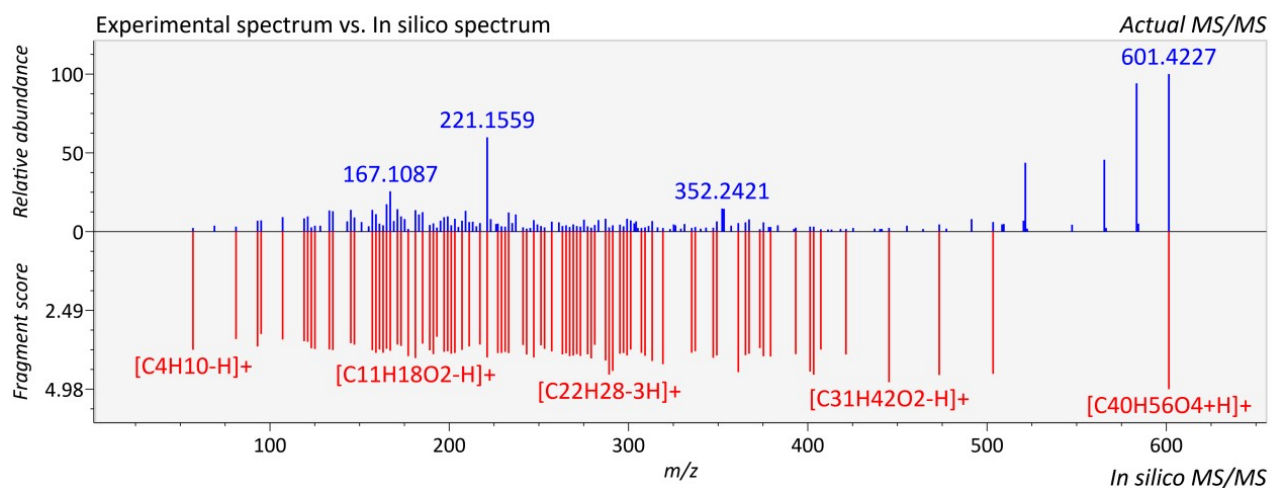

## No.168 1-Monopalmitin

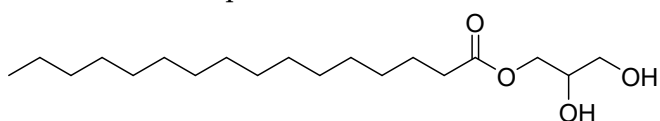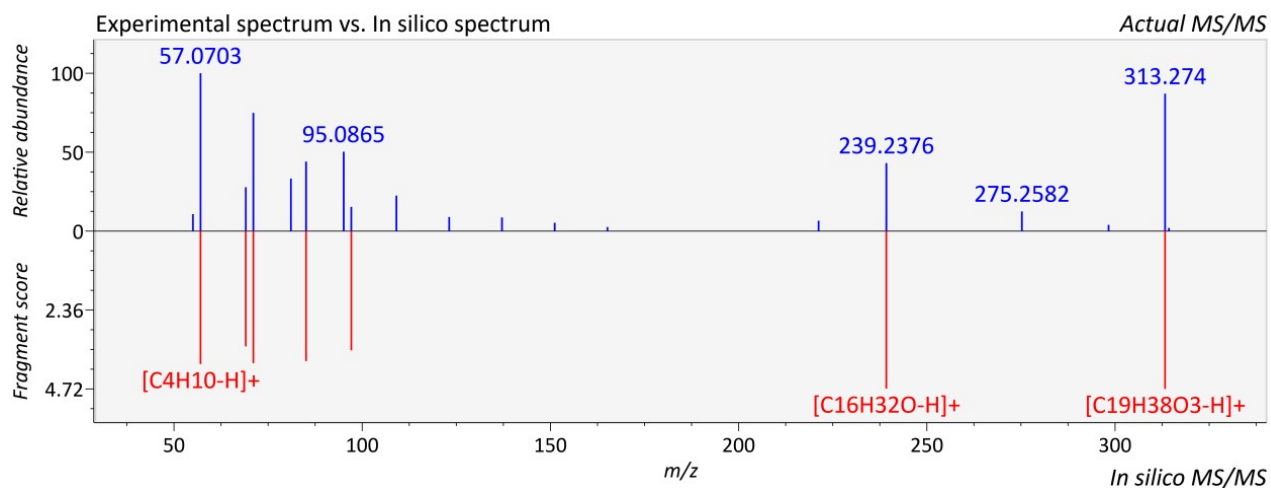No.169  $\alpha$ -Amyrin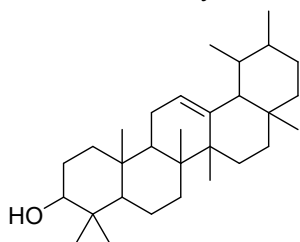

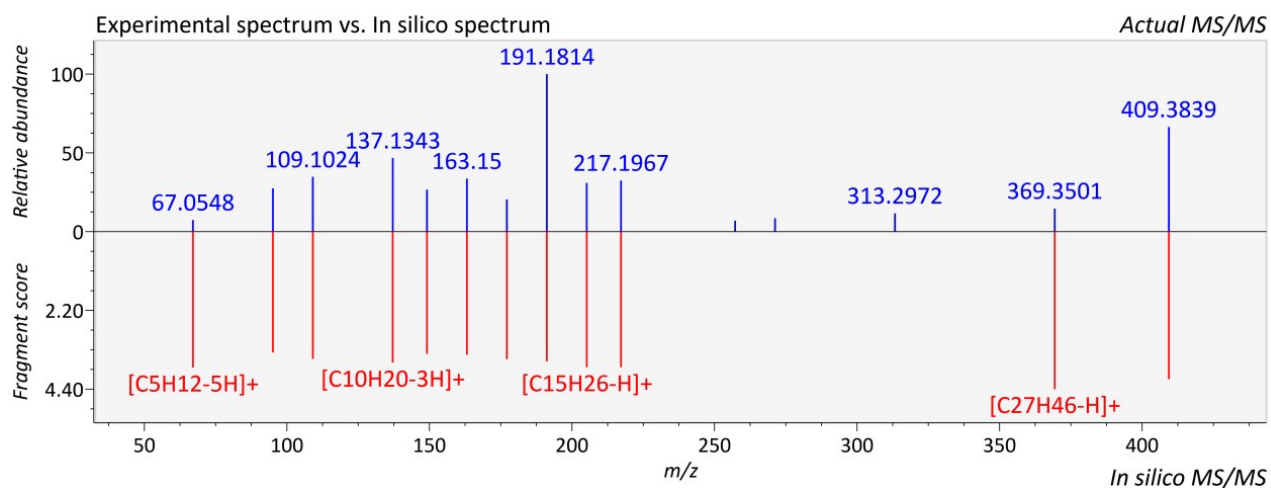

No.170 5 $\alpha$ ,8 $\alpha$ -Epidioxy-24-methylcholesta-6,22-dien-3 $\beta$ -ol

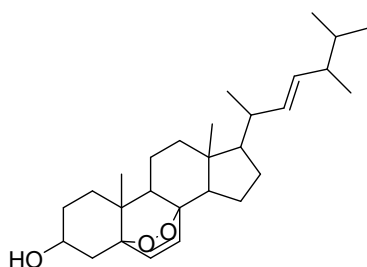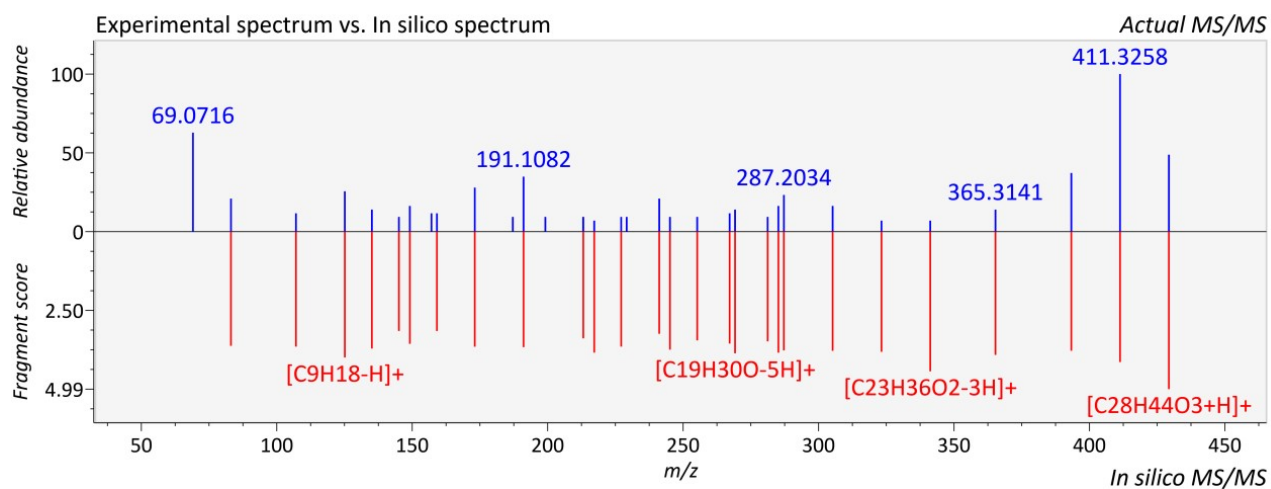

No.171 Pheophorbide a

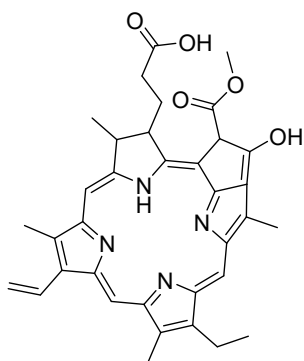

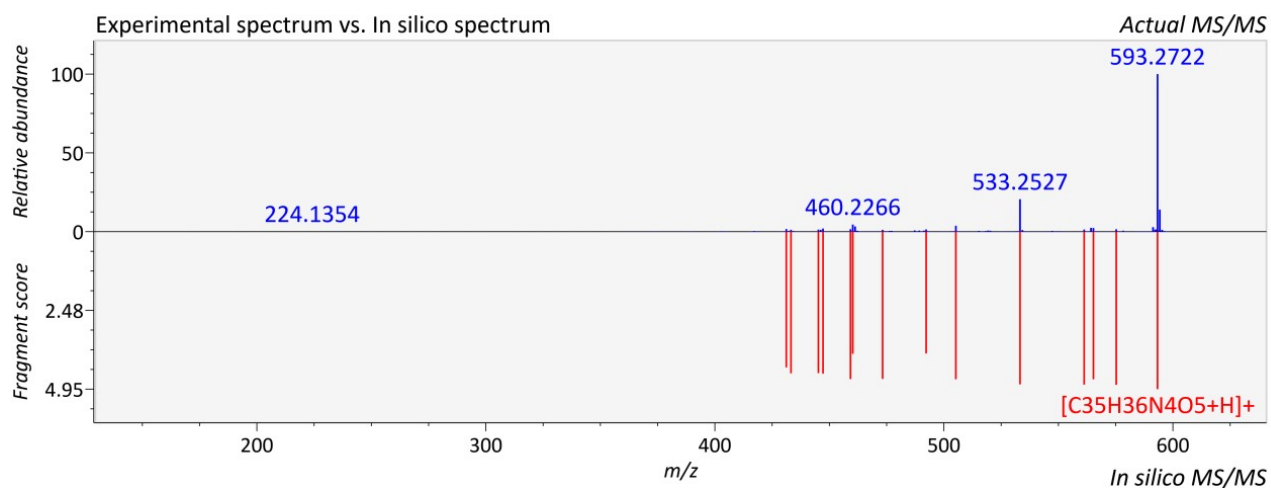

No.172 Hederagenin

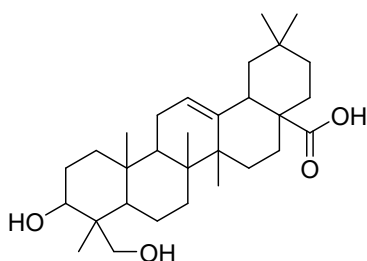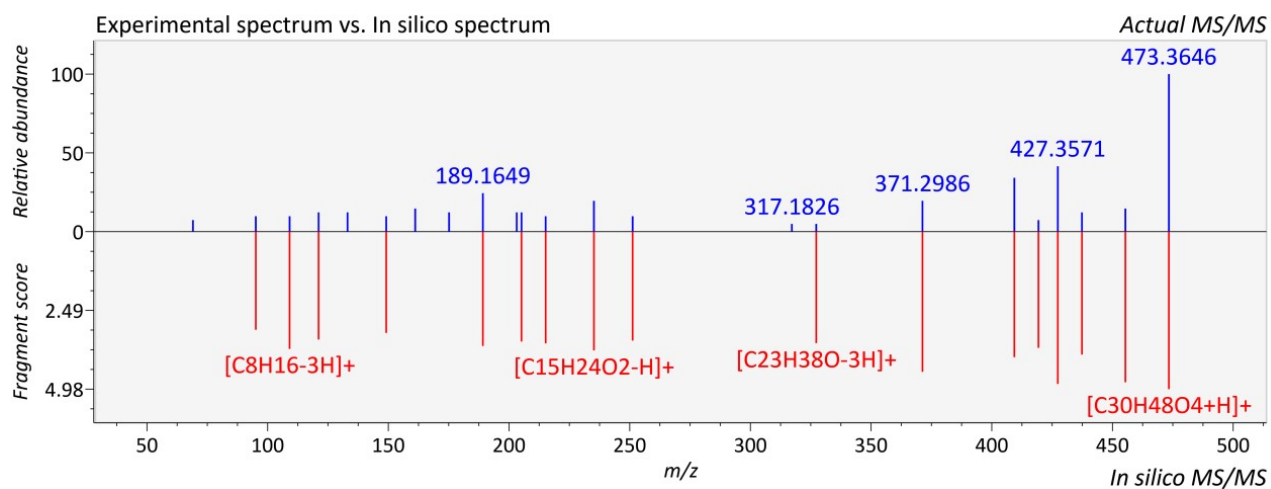

No.173 Stigmasta-4,22-dien-3-one

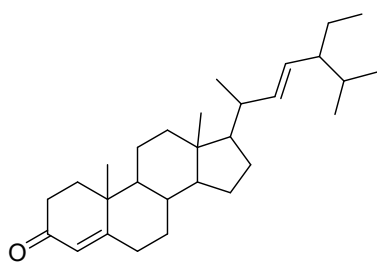

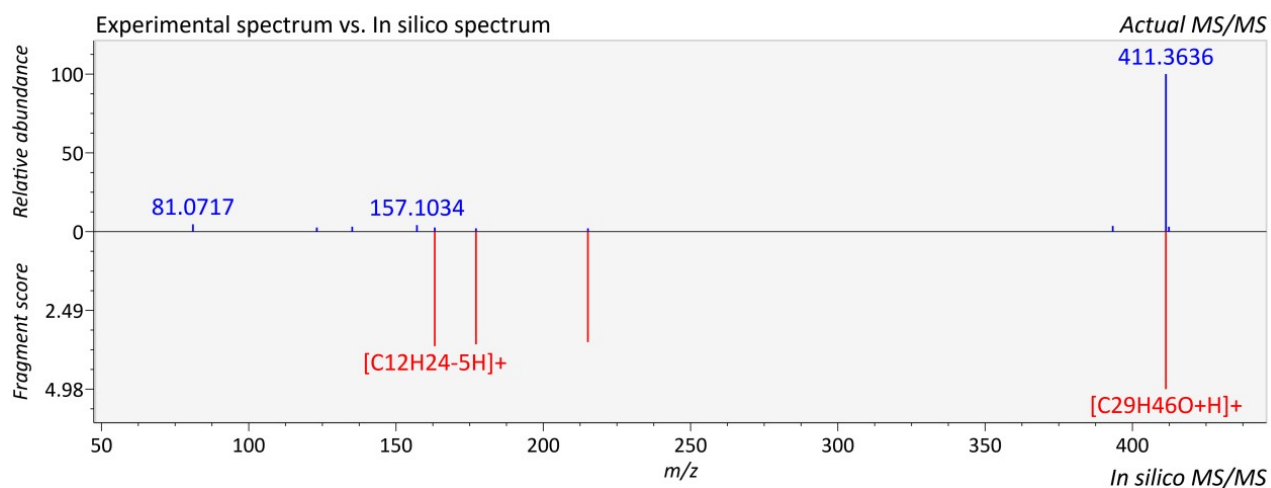

No.174 Oleanolic acid acetate

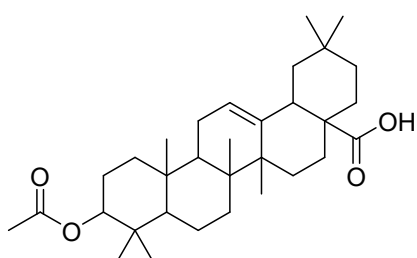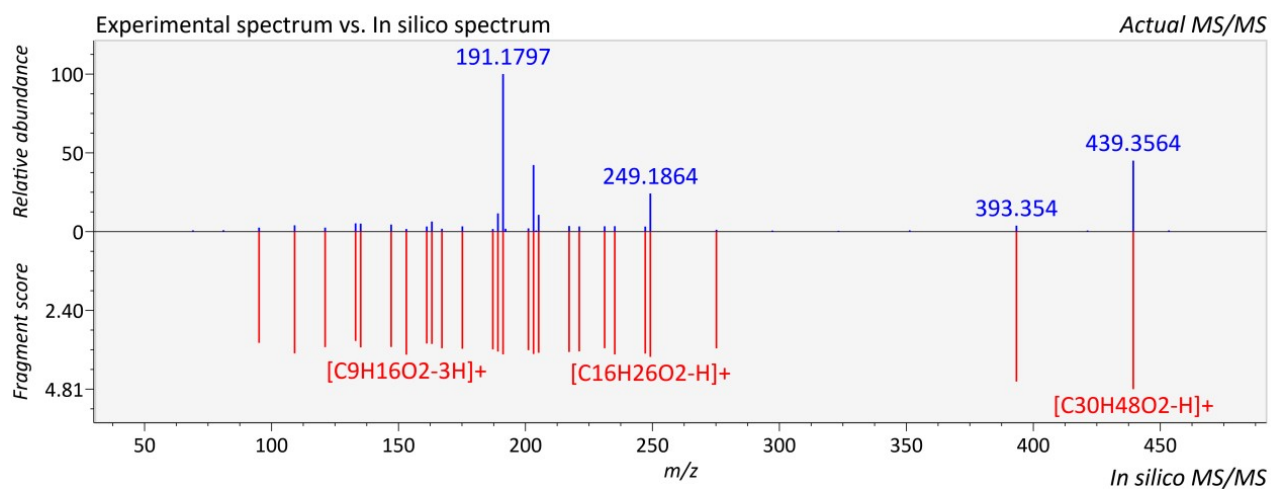

No.175 Emodin-6-geranyloxy

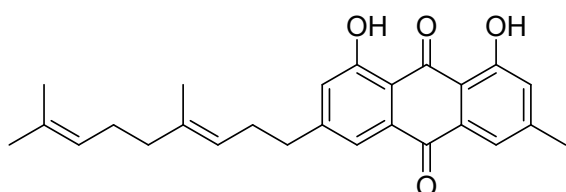

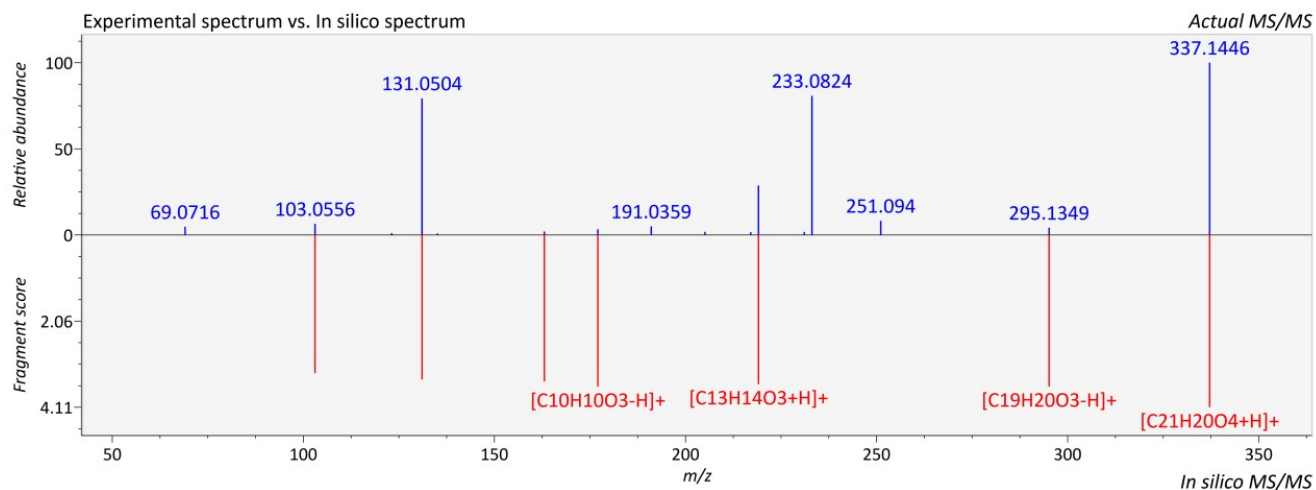

No.176 Methyl -21-hydroxypheophorbide a

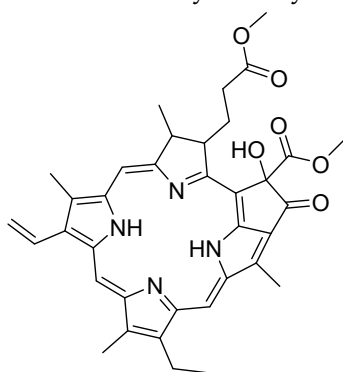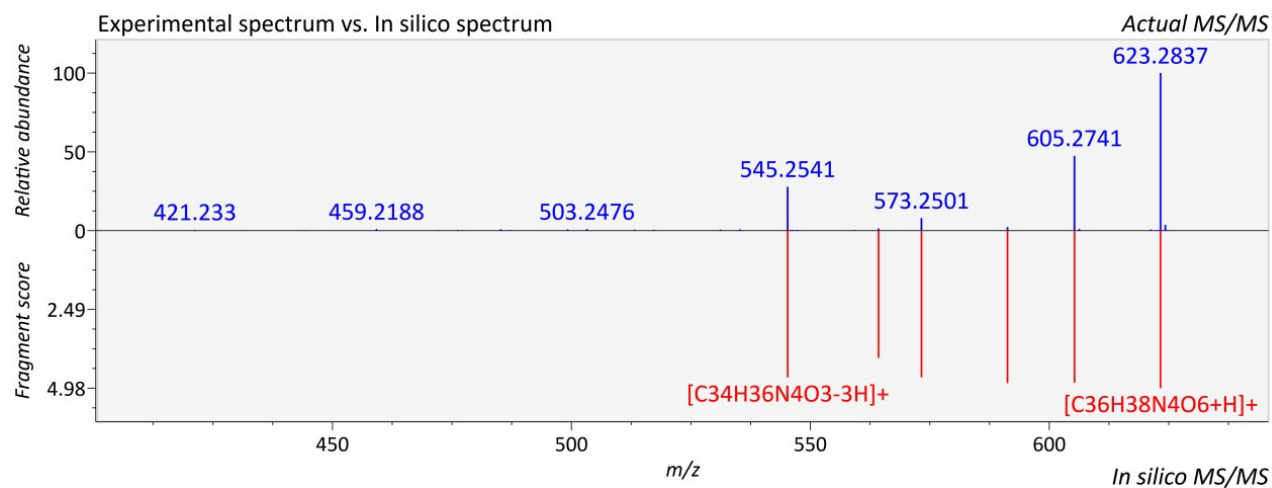

No.177 Morinol A acetate

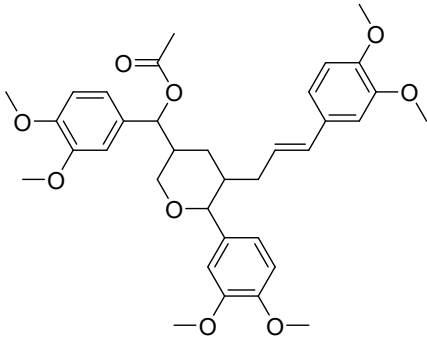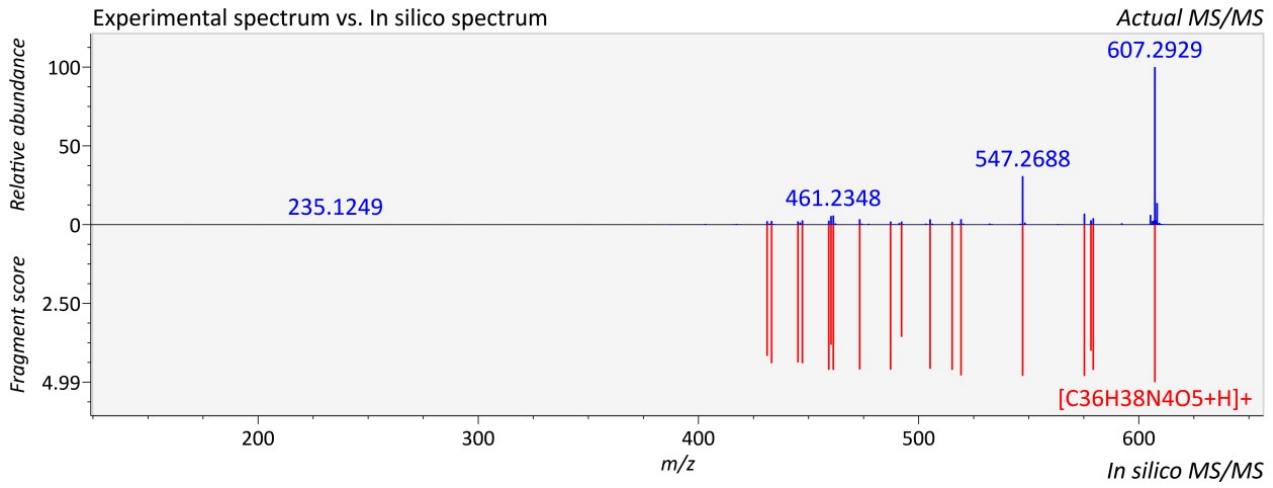

# No.178 Stigmasterol

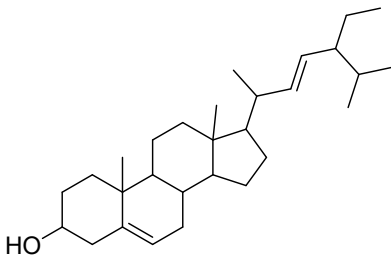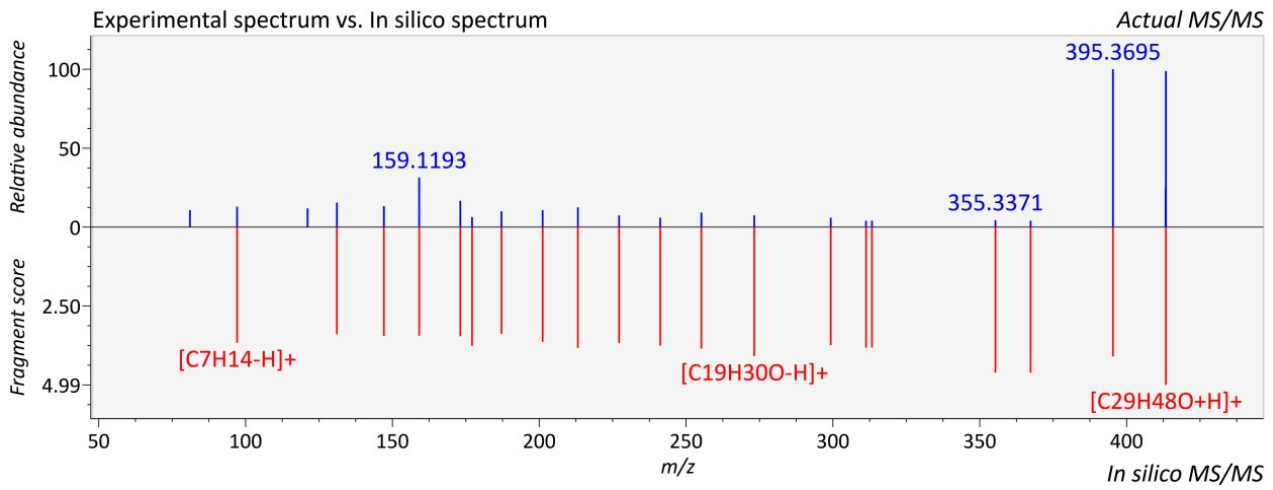

**Table S3.** Content comparison of identified chemical markers in *Damnacanthus indicus* from seven different provinces.

| Compound name                                          | Hunan          | Guangxi        | Zhejiang       | Yunnan         | Guizhou        | Guangdong      | Jiangxi        |
|--------------------------------------------------------|----------------|----------------|----------------|----------------|----------------|----------------|----------------|
| <i>p</i> -Coumaric acid                                | 50.45 ± 0.02 * | 28.15 ± 0.00   | 44.23 ± 0.00   | 5.95 ± 0.00    | 3.80 ± 0.00    | 60.15 ± 0.00   | 35.95 ± 0.01   |
| 4-Oxo-β-ionone                                         | 30.08 ± 0.01   | 66.58 ± 0.02   | 48.45 ± 0.03   | 10.39 ± 0.01   | 16.39 ± 0.01   | 78.09 ± 0.01   | 43.70 ± 0.01   |
| Methyl ferulate                                        | 100.79 ± 0.04  | 268.46 ± 0.13  | 174.68 ± 0.02  | 497.13 ± 0.02  | 377.02 ± 0.02  | 152.63 ± 0.01  | 78.89 ± 0.02   |
| 1-Formylanthraquinone                                  | 838.62 ± 0.30  | 2509.75 ± 0.25 | 1466.29 ± 0.75 | 6472.98 ± 0.45 | 5474.22 ± 0.15 | 576.43 ± 0.03  | 535.73 ± 0.08  |
| Xanthopurpurin                                         | 168.09 ± 0.11  | 18.70 ± 0.01   | 187.82 ± 0.06  | 41.70 ± 0.01   | 65.88 ± 0.01   | 40.86 ± 0.00   | 186.27 ± 0.16  |
| 1-Hydroxyl-2-carbaldehyde-anthraquinone                | 197.95 ± 0.02  | 452.43 ± 0.04  | 294.21 ± 0.09  | 2024.47 ± 0.22 | 1601.61 ± 0.10 | 220.68 ± 0.02  | 182.81 ± 0.07  |
| Rubiadin                                               | 502.15 ± 0.25  | 1294.60 ± 0.35 | 759.44 ± 0.20  | 229.09 ± 0.05  | 279.12 ± 0.01  | 926.51 ± 0.02  | 565.23 ± 0.42  |
| Digiferruginol                                         | 53.73 ± 0.02   | 243.19 ± 0.08  | 50.41 ± 0.01   | 3.06 ± 0.00    | 31.05 ± 0.02   | 98.77 ± 0.00   | 67.07 ± 0.03   |
| 1-Hydroxyl-8-methoxyl-2-methyl-anthraquinone           | 0.35 ± 0.00    | 0.94 ± 0.00    | 1.47 ± 0.00    | 77.00 ± 0.08   | 322.30 ± 0.01  | 2.81 ± 0.00    | 0.55 ± 0.00    |
| Rubiadin 1-methyl ether                                | 1500.73 ± 0.36 | 3880.43 ± 1.66 | 2158.73 ± 0.31 | 360.85 ± 0.13  | 515.07 ± 0.01  | 3291.70 ± 0.08 | 1929.43 ± 1.28 |
| 1,5-Dihydroxy-2-methoxy-9,10-anthracenedione           | 27.03 ± 0.00   | 113.85 ± 0.07  | 44.25 ± 0.01   | 293.65 ± 0.05  | 213.34 ± 0.01  | 43.61 ± 0.02   | 34.10 ± 0.01   |
| 7-Methoxyanthra[1,2- <i>d</i> ]-1,3-dioxole-6,11-dione | 5.81 ± 0.00    | 216.97 ± 0.10  | 8.13 ± 0.00    | 15.65 ± 0.00   | 16.35 ± 0.00   | 22.36 ± 0.00   | 7.91 ± 0.00    |
| 1,5-Dimethoxyl-2-methyl-anthraquinone                  | 29.30 ± 0.05   | 14.80 ± 0.01   | 2.21 ± 0.01    | 89.80 ± 0.04   | 77.05 ± 0.00   | 2.65 ± 0.00    | 2.06 ± 0.00    |
| Munjistin                                              | 20.36 ± 0.00   | 50.72 ± 0.00   | 29.67 ± 0.01   | 149.27 ± 0.05  | 84.16 ± 0.00   | 18.09 ± 0.00   | 14.45 ± 0.01   |
| 1,5-Dihydroxyl-3-carboxy-anthraquinone                 | 14.59 ± 0.01   | 44.75 ± 0.01   | 15.44 ± 0.00   | 94.60 ± 0.01   | 58.25 ± 0.00   | 13.84 ± 0.00   | 14.24 ± 0.01   |
| Norjuzunal                                             | 4.22 ± 0.00    | 34.12 ± 0.02   | 9.89 ± 0.01    | 1.16 ± 0.00    | 0.71 ± 0.00    | 10.66 ± 0.00   | 6.67 ± 0.01    |
| Ophiohayatone A                                        | 1822.61 ± 0.97 | 3048.91 ± 0.43 | 1600.47 ± 0.28 | 824.79 ± 0.13  | 719.88 ± 0.02  | 2182.09 ± 0.05 | 1602.21 ± 0.89 |
| 13-HOTE                                                | 428.07 ± 0.13  | 1419.12 ± 0.10 | 621.19 ± 0.33  | 1128.85 ± 0.08 | 1332.91 ± 0.05 | 1503.18 ± 0.09 | 751.27 ± 0.05  |
| 1,6-Dihydroxyl-2,5-dimethoxyl-                         | 1910.87 ± 0.85 | 4854.35 ± 0.15 | 2034.16 ± 0.12 | 223.07 ± 0.07  | 243.95 ± 0.01  | 3067.70 ± 0.09 | 1712.52 ± 1.02 |

| Compound name                                           | Hunan          | Guangxi       | Zhejiang      | Yunnan         | Guizhou        | Guangdong      | Jiangxi       |
|---------------------------------------------------------|----------------|---------------|---------------|----------------|----------------|----------------|---------------|
| anthraquinone                                           |                |               |               |                |                |                |               |
| 2,7,8-Trihydroxyl-1-methoxyl-3-methyl-anthraquinone     | 418.91 ± 0.15  | 705.68 ± 0.07 | 555.91± 0.10  | 31.10 ± 0.00   | 30.89 ± 0.00   | 435.53 ± 0.01  | 511.19 ± 0.11 |
| Obtusifolin-6-hydroxyl                                  | 311.37 ± 0.12  | 573.26 ± 0.09 | 384.57 ± 0.11 | 13.59 ± 0.01   | 29.28 ± 0.00   | 372.94 ± 0.03  | 278.18 ± 0.08 |
| 3,6-Dihydroxyl-1-methoxyl-2-hydroxymethyl-anthraquinone | 15.42 ± 0.01   | 105.50 ± 0.08 | 29.88 ± 0.01  | 3.95 ± 0.00    | 4.63 ± 0.00    | 24.08 ± 0.00   | 11.48 ± 0.01  |
| 1,3-Dihydroxyl-5,6-dimethoxyl-2-methyl-anthraquinone    | 107.08 ± 0.73  | 263.45 ± 0.07 | 156.90 ± 0.07 | 20.51 ± 0.01   | 23.30 ± 0.01   | 152.96 ± 0.01  | 131.52 ± 0.09 |
| Deacetylasperuloside                                    | 1066.17 ± 0.22 | 543.37 ± 0.28 | 1059.24± 0.32 | 1464.64 ± 0.19 | 1200.41 ± 0.02 | 1054.44 ± 0.04 | 964.07 ± 0.06 |
| Franguloside                                            | 15.32 ± 0.01   | 48.65 ± 0.02  | 22.56 ± 0.00  | 67.71 ± 0.01   | 63.28 ± 0.00   | 22.84 ± 0.00   | 7.84 ± 0.01   |
| Betulin                                                 | 2.67 ± 0.00    | 37.32 ± 0.01  | 5.03± 0.00    | 9.04 ± 0.01    | 8.59 ± 0.00    | 21.72 ± 0.00   | 1.99 ± 0.00   |
| 1-O-Glucoside-2,6,8-trihydroxyl-3-methyl-anthraquinone  | 111.47 ± 0.05  | 69.43 ± 0.02  | 141.22 ± 0.05 | 9.06 ± 0.01    | 5.05 ± 0.00    | 126.95 ± 0.02  | 103.86 ± 0.02 |

\* Content (ng/mL) was calculated by comparing the peak areas of compound with that of internal standard (average± standard deviation).

**Table S4.** The screening criteria for 27 identified chemical markers.

| Compound name                                          | VIP  | p-value  | Compound name                                           | VIP  | p-value  |
|--------------------------------------------------------|------|----------|---------------------------------------------------------|------|----------|
| <i>p</i> -Coumaric acid                                | 1.20 | 1.62E-07 | 1,5-Dihydroxyl-3-carboxy-anthraquinone                  | 1.45 | 5.30E-16 |
| 4-Oxo- $\beta$ -ionone                                 | 1.24 | 1.03E-07 | Norjuzunal                                              | 1.20 | 2.73E-07 |
| Methyl ferulate                                        | 1.45 | 2.40E-16 | Ophiohayatone A                                         | 1.18 | 1.00E-06 |
| 1-Formylanthraquinone                                  | 1.54 | 2.60E-22 | 13-HOTE                                                 | 1.39 | 1.30E-14 |
| Xanthopurpurin                                         | 1.02 | 5.50E-05 | 1,6-Dihydroxyl-2,5-dimethoxyl-anthraquinone             | 1.46 | 1.30E-13 |
| 1-Hydroxyl-2-carbaldehyde-anthraquinone                | 1.61 | 1.00E-27 | 2,7,8-Trihydroxyl-1-methoxyl-3-methyl-anthraquinone     | 1.43 | 1.70E-12 |
| Rubiadin                                               | 1.22 | 2.33E-07 | Obtusifolin-6-hydroxyl                                  | 1.38 | 3.00E-11 |
| Digiferruginol                                         | 1.39 | 2.20E-11 | 3,6-Dihydroxyl-1-methoxyl-2-hydroxymethyl-anthraquinone | 1.07 | 4.10E-05 |
| 1-Hydroxyl-8-methoxyl-2-methyl-anthraquinone           | 1.20 | 1.40E-07 | 1,3-Dihydroxyl-5,6-dimethoxyl-2-methyl-anthraquinone    | 1.18 | 4.00E-06 |
| Rubiadin 1-methyl ether                                | 1.31 | 3.15E-09 | Deacetylasperuloside                                    | 1.12 | 8.00E-06 |
| 1,5-Dihydroxy-2-methoxy-9,10-anthracenedione           | 1.52 | 2.50E-21 | Franguloside                                            | 1.39 | 2.90E-14 |
| 7-Methoxyanthra[1,2- <i>d</i> ]-1,3-dioxole-6,11-dione | 1.24 | 2.43E-08 | Betulin                                                 | 1.44 | 1.80E-15 |
| 1,5-Dimethoxyl-2-methyl-anthraquinone                  | 1.12 | 2.00E-06 | 1-O-Glucoside-2,6,8-trihydroxyl-3-methyl-anthraquinone  | 1.24 | 8.44E-09 |
| Munjistin                                              | 1.47 | 3.00E-16 |                                                         |      |          |
